# Supplementary material for: Structural and vibrational properties of lanthanide Lindqvist polyoxometalate complexes
Source: Royal Society of Chemistry journal article supplement (doi:10.1039/d4dt00786g), 2024-01-01
Supplement: d4dt00786g1.pdf [file d4dt00786g1.pdf]

## Structural and Vibrational Properties of Lanthanide Lindqvist Polyoxometalate Complexes

Primadi J. Subintoro<sup>1</sup> and Korey P. Carter<sup>1\*</sup>

<sup>1</sup>Department of Chemistry, University of Iowa, Iowa City, IA 52242, United States

### Table of Contents

|                                                                                                                                                                                                                                                                   |                |
|-------------------------------------------------------------------------------------------------------------------------------------------------------------------------------------------------------------------------------------------------------------------|----------------|
| Crystallographic parameters for complexes <b>1-14</b> (LaW <sub>10</sub> – LuW <sub>10</sub> )                                                                                                                                                                    | <b>S1</b>      |
| MIR spectra of sodium paratungstate                                                                                                                                                                                                                               | <b>S2</b>      |
| Polyhedral representation and crystallographic parameters for sodium paratungstate                                                                                                                                                                                | <b>S3</b>      |
| Ball and stick representation of complex <b>10</b> (HoW <sub>10</sub> )                                                                                                                                                                                           | <b>S4</b>      |
| Distortion parameters scheme and methodological details                                                                                                                                                                                                           | <b>S4-S5</b>   |
| Polyhedral representations of complexes <b>1</b> and <b>2</b> that highlight differences in lattice packing                                                                                                                                                       | <b>S6</b>      |
| Polyhedral representation of cell packing for complexes <b>1, 4, 7, and 10</b>                                                                                                                                                                                    | <b>S7</b>      |
| Plots of LnW <sub>10</sub> structural distortion parameters versus lanthanide ionic radii                                                                                                                                                                         | <b>S8-S10</b>  |
| Plot of d <sub>Ln-Na</sub> versus lanthanide ionic radii                                                                                                                                                                                                          | <b>S11</b>     |
| Fitted far IR spectra of complexes <b>1-14</b>                                                                                                                                                                                                                    | <b>S12-S25</b> |
| Summary table of fitted FIR modes in complexes <b>1-14</b>                                                                                                                                                                                                        | <b>S26</b>     |
| Comparison of Raman peak intensities in spectra from different crystals of complex <b>2</b>                                                                                                                                                                       | <b>S27</b>     |
| Fitted Raman spectra of complexes <b>1-14</b>                                                                                                                                                                                                                     | <b>S28-S41</b> |
| Summary table of fitted Raman modes in complexes <b>1-14</b>                                                                                                                                                                                                      | <b>S42</b>     |
| Representative example of fitted MIR spectra for LnW <sub>10</sub> series                                                                                                                                                                                         | <b>S43</b>     |
| Plots of FIR and Raman vibrational mode [ $\nu(\text{WO}_5)_2$ , $\rho(\text{LnO}_8)$ , $\nu/\rho(\text{LnO}_8)$ , $\delta(\text{W-O-W}/\text{W=O}/\text{Ln-O-W})$ , $\nu(\text{Ln-O-W})$ ] frequencies versus LnW <sub>10</sub> structural distortion parameters | <b>S44-S58</b> |
| Partial least squares (PLS) analysis methodological details                                                                                                                                                                                                       | <b>S59-S60</b> |
| Partial least squares (PLS) analysis plots                                                                                                                                                                                                                        | <b>S61-S71</b> |
| References                                                                                                                                                                                                                                                        | <b>S72</b>     |

### Supporting Information

**Table S1.** Crystallographic parameters for complexes **1-14** (LaW<sub>10</sub> – LuW<sub>10</sub>).

| Formula                      | Na <sub>9</sub> LaW <sub>10</sub> O <sub>36</sub><br>•34H <sub>2</sub> O ( <b>1</b> ) | Na <sub>9</sub> CeW <sub>10</sub> O <sub>36</sub><br>•28H <sub>2</sub> O ( <b>2</b> ) | Na <sub>9</sub> PrW <sub>10</sub> O <sub>36</sub><br>•29H <sub>2</sub> O ( <b>3</b> ) | Na <sub>9</sub> NdW <sub>10</sub> O <sub>36</sub><br>•32H <sub>2</sub> O ( <b>4</b> ) | Na <sub>9</sub> SmW <sub>10</sub> O <sub>36</sub><br>•36H <sub>2</sub> O ( <b>5</b> ) | Na <sub>9</sub> EuW <sub>10</sub> O <sub>36</sub><br>•36H <sub>2</sub> O ( <b>6</b> ) | Na <sub>9</sub> GdW <sub>10</sub> O <sub>36</sub><br>•36H <sub>2</sub> O ( <b>7</b> ) |
|------------------------------|---------------------------------------------------------------------------------------|---------------------------------------------------------------------------------------|---------------------------------------------------------------------------------------|---------------------------------------------------------------------------------------|---------------------------------------------------------------------------------------|---------------------------------------------------------------------------------------|---------------------------------------------------------------------------------------|
| Mr                           | 3304.32                                                                               | 3209.53                                                                               | 3228.72                                                                               | 3269.65                                                                               | 3347.76                                                                               | 3349.37                                                                               | 3354.66                                                                               |
| SG                           | P-1                                                                                   |
| a (Å)                        | 12.8892 (13)                                                                          | 12.8331 (6)                                                                           | 12.8137 (6)                                                                           | 12.7722 (5)                                                                           | 12.9063 (17)                                                                          | 12.9037 (5)                                                                           | 12.8985 (5)                                                                           |
| b (Å)                        | 12.9526 (12)                                                                          | 12.9660 (6)                                                                           | 12.9517 (7)                                                                           | 13.0343 (6)                                                                           | 13.1156 (15)                                                                          | 13.1129 (5)                                                                           | 13.1035 (3)                                                                           |
| c (Å)                        | 20.1296 (19)                                                                          | 20.1117 (10)                                                                          | 20.0978 (12)                                                                          | 19.6802 (8)                                                                           | 20.911 (3)                                                                            | 20.8991 (7)                                                                           | 20.9180 (8)                                                                           |
| α (°)                        | 102.062 (4)                                                                           | 101.615 (2)                                                                           | 101.581 (2)                                                                           | 98.160 (2)                                                                            | 76.931 (5)                                                                            | 77.072 (1)                                                                            | 77.025 (1)                                                                            |
| β (°)                        | 97.834 (4)                                                                            | 98.179 (2)                                                                            | 98.253 (2)                                                                            | 102.820 (2)                                                                           | 83.975 (5)                                                                            | 83.923 (2)                                                                            | 83.922 (1)                                                                            |
| γ (°)                        | 101.546 (4)                                                                           | 101.864 (2)                                                                           | 101.755 (2)                                                                           | 101.538 (2)                                                                           | 77.418 (5)                                                                            | 77.463 (2)                                                                            | 77.519 (1)                                                                            |
| V (Å <sup>3</sup> )          | 3163.8 (5)                                                                            | 3148.5 (3)                                                                            | 3139.3 (3)                                                                            | 3070.0 (2)                                                                            | 3359.4 (7)                                                                            | 3358.3 (2)                                                                            | 3357.7 (2)                                                                            |
| R <sub>int</sub>             | 0.0839                                                                                | 0.0969                                                                                | 0.0878                                                                                | 0.1081                                                                                | 0.0945                                                                                | 0.0861                                                                                | 0.0703                                                                                |
| R1                           | 0.0512                                                                                | 0.0489                                                                                | 0.0451                                                                                | 0.0339                                                                                | 0.0361                                                                                | 0.0426                                                                                | 0.0412                                                                                |
| wR2                          | 0.1202                                                                                | 0.1264                                                                                | 0.1181                                                                                | 0.0899                                                                                | 0.0865                                                                                | 0.1012                                                                                | 0.0882                                                                                |
| GooF                         | 1.200                                                                                 | 1.075                                                                                 | 1.115                                                                                 | 1.041                                                                                 | 1.121                                                                                 | 1.100                                                                                 | 1.148                                                                                 |
| Mu (mm <sup>-1</sup> )       | 18.947                                                                                | 19.071                                                                                | 19.18                                                                                 | 19.670                                                                                | 18.086                                                                                | 18.151                                                                                | 18.208                                                                                |
| F000                         | 2912                                                                                  | 2818                                                                                  | 2838                                                                                  | 2878                                                                                  | 2954                                                                                  | 2956                                                                                  | 2958                                                                                  |
| Z                            | 2                                                                                     | 2                                                                                     | 2                                                                                     | 2                                                                                     | 2                                                                                     | 2                                                                                     | 2                                                                                     |
| Density (g/cm <sup>3</sup> ) | 3.469                                                                                 | 3.385                                                                                 | 3.416                                                                                 | 3.537                                                                                 | 3.310                                                                                 | 3.312                                                                                 | 3.318                                                                                 |
| Temperature (K)              | 100 (2)                                                                               | 100 (2)                                                                               | 100 (2)                                                                               | 100 (2)                                                                               | 100 (2)                                                                               | 100 (2)                                                                               | 100 (2)                                                                               |
| Wavelength (Å)               | 0.71073                                                                               | 0.71073                                                                               | 0.71073                                                                               | 0.71073                                                                               | 0.71073                                                                               | 0.71073                                                                               | 0.71073                                                                               |

  

| Formula                      | Na <sub>9</sub> TbW <sub>10</sub> O <sub>36</sub><br>•37H <sub>2</sub> O ( <b>8</b> ) | Na <sub>9</sub> DyW <sub>10</sub> O <sub>36</sub><br>•35H <sub>2</sub> O ( <b>9</b> ) | Na <sub>9</sub> HoW <sub>10</sub> O <sub>36</sub><br>•35H <sub>2</sub> O ( <b>10</b> ) | Na <sub>9</sub> ErW <sub>10</sub> O <sub>36</sub><br>•35H <sub>2</sub> O ( <b>11</b> ) | Na <sub>9</sub> TmW <sub>10</sub> O <sub>36</sub><br>•35H <sub>2</sub> O ( <b>12</b> ) | Na <sub>9</sub> YbW <sub>10</sub> O <sub>36</sub><br>•37H <sub>2</sub> O ( <b>13</b> ) | Na <sub>9</sub> LuW <sub>10</sub> O <sub>36</sub><br>•32H <sub>2</sub> O ( <b>14</b> ) |
|------------------------------|---------------------------------------------------------------------------------------|---------------------------------------------------------------------------------------|----------------------------------------------------------------------------------------|----------------------------------------------------------------------------------------|----------------------------------------------------------------------------------------|----------------------------------------------------------------------------------------|----------------------------------------------------------------------------------------|
| Mr                           | 3372.33                                                                               | 3343.91                                                                               | 3346.34                                                                                | 3364.67                                                                                | 3350.34                                                                                | 3387.25                                                                                | 3356.38                                                                                |
| SG                           | P-1                                                                                   | P-1                                                                                   | P-1                                                                                    | P-1                                                                                    | P-1                                                                                    | P-1                                                                                    | P-1                                                                                    |
| a (Å)                        | 12.8721 (6)                                                                           | 12.7414 (5)                                                                           | 12.727 (3)                                                                             | 12.7343 (9)                                                                            | 12.8752 (9)                                                                            | 12.8747 (6)                                                                            | 12.7347 (7)                                                                            |
| b (Å)                        | 13.0881 (7)                                                                           | 13.0651 (5)                                                                           | 13.063 (5)                                                                             | 13.0518 (8)                                                                            | 13.0761 (9)                                                                            | 13.0649 (6)                                                                            | 13.0458 (7)                                                                            |
| c (Å)                        | 20.8876 (11)                                                                          | 20.4611 (9)                                                                           | 20.465 (7)                                                                             | 20.4813 (15)                                                                           | 20.8761 (12)                                                                           | 20.9095 (9)                                                                            | 20.4697 (12)                                                                           |
| α (°)                        | 77.102 (2)                                                                            | 82.874 (2)                                                                            | 82.848 (7)                                                                             | 82.805 (3)                                                                             | 77.097 (2)                                                                             | 77.190 (2)                                                                             | 82.887 (2)                                                                             |
| β (°)                        | 83.865 (2)                                                                            | 74.520 (2)                                                                            | 74.548 (8)                                                                             | 74.496 (3)                                                                             | 83.853 (2)                                                                             | 83.860 (2)                                                                             | 74.479 (2)                                                                             |
| γ (°)                        | 77.384 (2)                                                                            | 88.910 (2)                                                                            | 88.878 (11)                                                                            | 88.750 (3)                                                                             | 77.351 (3)                                                                             | 77.461 (2)                                                                             | 88.659 (2)                                                                             |
| V (Å <sup>3</sup> )          | 3341.1 (3)                                                                            | 3256.8 (2)                                                                            | 3253.4 (18)                                                                            | 3254.2 (4)                                                                             | 3336.5 (4)                                                                             | 3341.3 (3)                                                                             | 3251.3 (3)                                                                             |
| R <sub>int</sub>             | 0.1072                                                                                | 0.0933                                                                                | 0.0898                                                                                 | 0.0967                                                                                 | 0.0953                                                                                 | 0.0608                                                                                 | 0.0895                                                                                 |
| R1                           | 0.0471                                                                                | 0.0267                                                                                | 0.0326                                                                                 | 0.0758                                                                                 | 0.0359                                                                                 | 0.0315                                                                                 | 0.0360                                                                                 |
| wR2                          | 0.1143                                                                                | 0.0585                                                                                | 0.0764                                                                                 | 0.1600                                                                                 | 0.0848                                                                                 | 0.0745                                                                                 | 0.0807                                                                                 |
| GooF                         | 1.1129                                                                                | 1.021                                                                                 | 1.111                                                                                  | 1.230                                                                                  | 1.105                                                                                  | 1.135                                                                                  | 1.100                                                                                  |
| Mu (mm <sup>-1</sup> )       | 18.366                                                                                | 18.899                                                                                | 18.986                                                                                 | 19.058                                                                                 | 18.657                                                                                 | 18.706                                                                                 | 19.300                                                                                 |
| F000                         | 2976                                                                                  | 2946                                                                                  | 2948                                                                                   | 2966                                                                                   | 2952                                                                                   | 2987                                                                                   | 2956                                                                                   |
| Z                            | 2                                                                                     | 2                                                                                     | 2                                                                                      | 2                                                                                      | 2                                                                                      | 2                                                                                      | 2                                                                                      |
| Density (g/cm <sup>3</sup> ) | 3.352                                                                                 | 3.410                                                                                 | 3.416                                                                                  | 3.434                                                                                  | 3.335                                                                                  | 3.367                                                                                  | 3.428                                                                                  |
| Temperature (K)              | 100 (2)                                                                               | 100 (2)                                                                               | 100 (2)                                                                                | 100 (2)                                                                                | 100 (2)                                                                                | 100 (2)                                                                                | 100 (2)                                                                                |
| Wavelength (Å)               | 0.71073                                                                               | 0.71073                                                                               | 0.71073                                                                                | 0.71073                                                                                | 0.71073                                                                                | 0.71073                                                                                | 0.71073                                                                                |

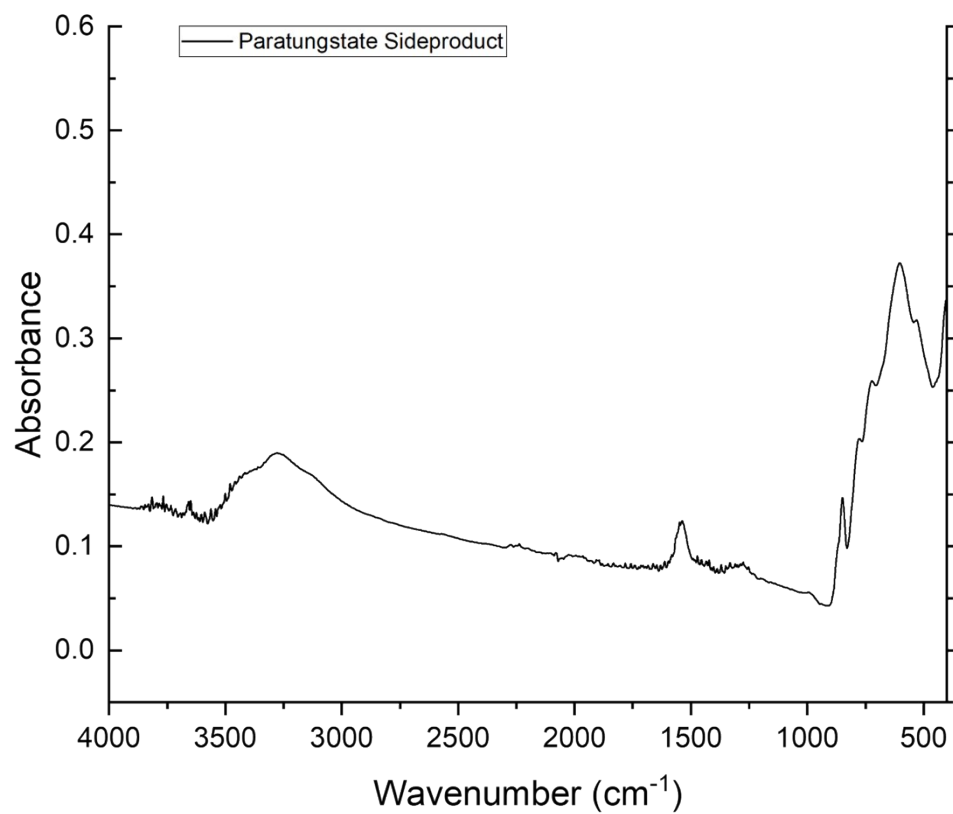

**Figure S1.** MIR spectra of sodium paratungstate ( $\text{Na}_{10}\text{H}_2\text{W}_{12}\text{O}_{40}\cdot\text{XH}_2\text{O}$ ) side product formed during synthesis of  $\text{LnW}_{10}$  complexes using method from Peacock and Weakly.

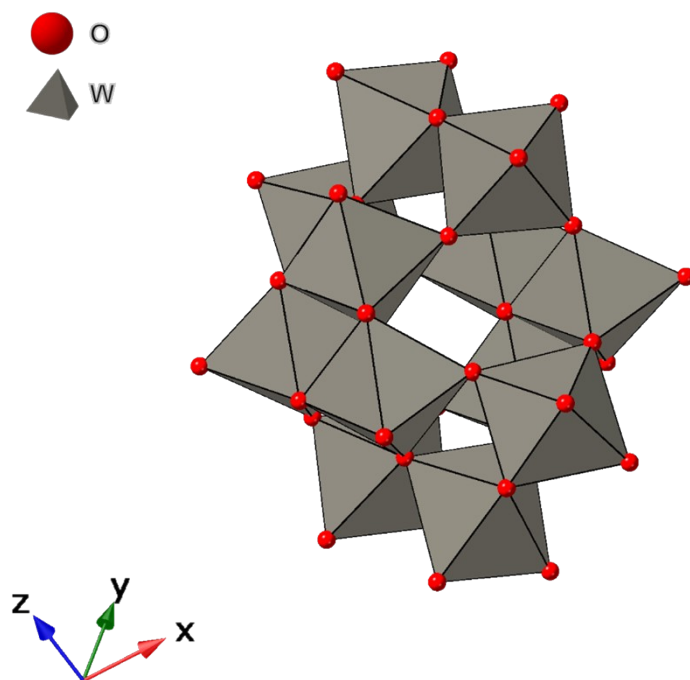

**Figure S2.** Polyhedral representation of sodium paratungstate ( $\text{Na}_{10}\text{W}_{12}\text{O}_{40}\cdot 21\text{H}_2\text{O}$ ), the byproduct of the  $\text{LnW}_{10}$  synthesis formed when using the protocol from Peacock and Weakley. Sodium cations and lattice water molecules have been excluded for clarity.

**Table S2.** Crystallographic parameters for sodium paratungstate.

| Formula                 | $\text{Na}_{10}\text{W}_{12}\text{O}_{40}\cdot 21\text{H}_2\text{O}$ |
|-------------------------|----------------------------------------------------------------------|
| Mr                      | 3411.98                                                              |
| SG                      | P-1                                                                  |
| a(Å)                    | 11.772                                                               |
| b(Å)                    | 12.428                                                               |
| c(Å)                    | 22.015                                                               |
| $\alpha$                | 86.357                                                               |
| $\beta$                 | 86.659                                                               |
| $\gamma$                | 66.438                                                               |
| V(Å <sup>3</sup> )      | 2944.4                                                               |
| Rint                    | 0.0505                                                               |
| R1                      | 0.1153                                                               |
| wR2                     | 0.2852                                                               |
| GooF                    | 1.182                                                                |
| Mu                      | 23.525                                                               |
| F000                    | 2972                                                                 |
| Z                       | 2                                                                    |
| Dx (g/cm <sup>3</sup> ) | 3.848                                                                |

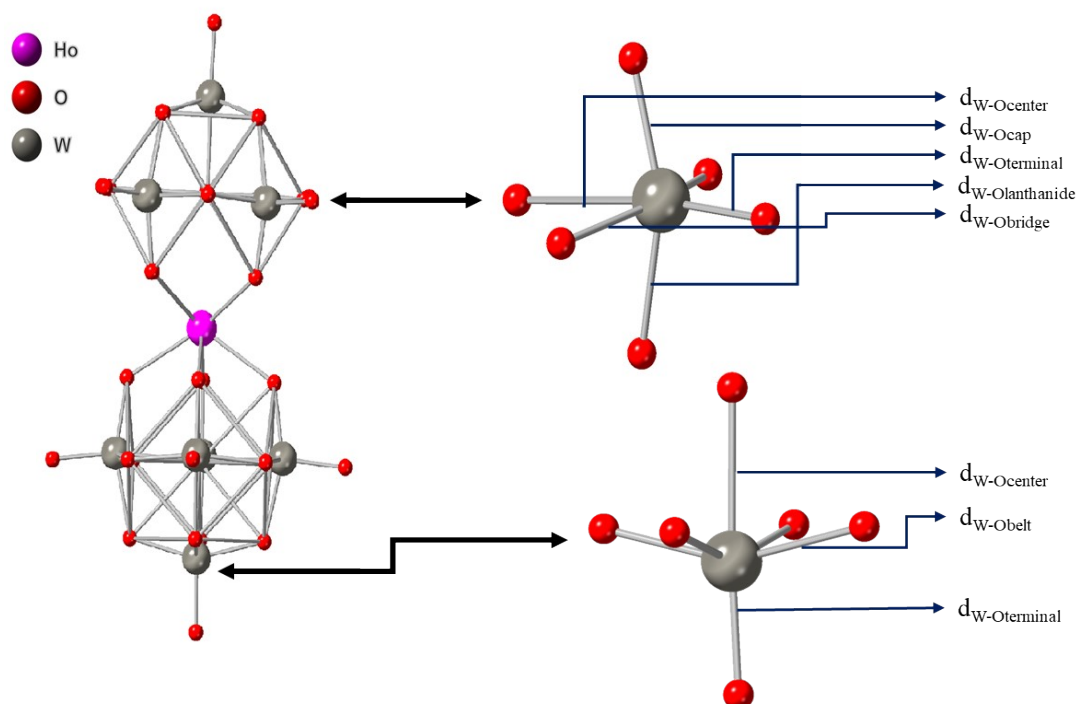

**Figure S3.** Ball and stick representation of complex **10** ( $\text{HoW}_{10}$ ) highlighting  $\text{WO}_6$  belt and cap moieties. The  $\text{WO}_6$  belt moiety possesses five different types of W-O bonds:  $\text{W-O}_{\text{center}}$ ,  $\text{W-O}_{\text{cap}}$ ,  $\text{W-O}_{\text{terminal}}$ ,  $\text{W-O}_{\text{lanthanide}}$ , and  $\text{W-O}_{\text{bridge}}$  whereas the  $\text{WO}_6$  cap moiety includes three unique types of W-O bonds:  $\text{W-O}_{\text{center}}$ ,  $\text{W-O}_{\text{belt}}$ , and  $\text{W-O}_{\text{terminal}}$ .

### Methodology for Acquiring Structural Distortion Parameters.

The plane angle (PA) is the angle between the two coordinating planes (red planes) as shown in **Figure S4 (Top)**. The plane distance (PD) is the difference in distance between the top coordinating plane with the metal center and the bottom coordinating plane with the metal center (**Figure S4, Top**). The skew angle (SA) is calculated by measuring the angle between a perpendicular plane constructed out of the metal center and two oxygen atoms that are approximately  $180^\circ$  from one another from the top coordinating plane (black planes—**Figure S4, Bottom**) and a perpendicular plane constructed out of the metal center and two oxygen atoms that are approximately  $180^\circ$  from one another from the bottom coordinating plane (blue planes—**Figure S4, Bottom**). This method produces four different SAs which are then averaged and subtracted from  $45^\circ$ . The absolute value of this calculation produces the final SA values. Generation of coordinating planes as well as distance and angle measurements were done using the Mercury software package.

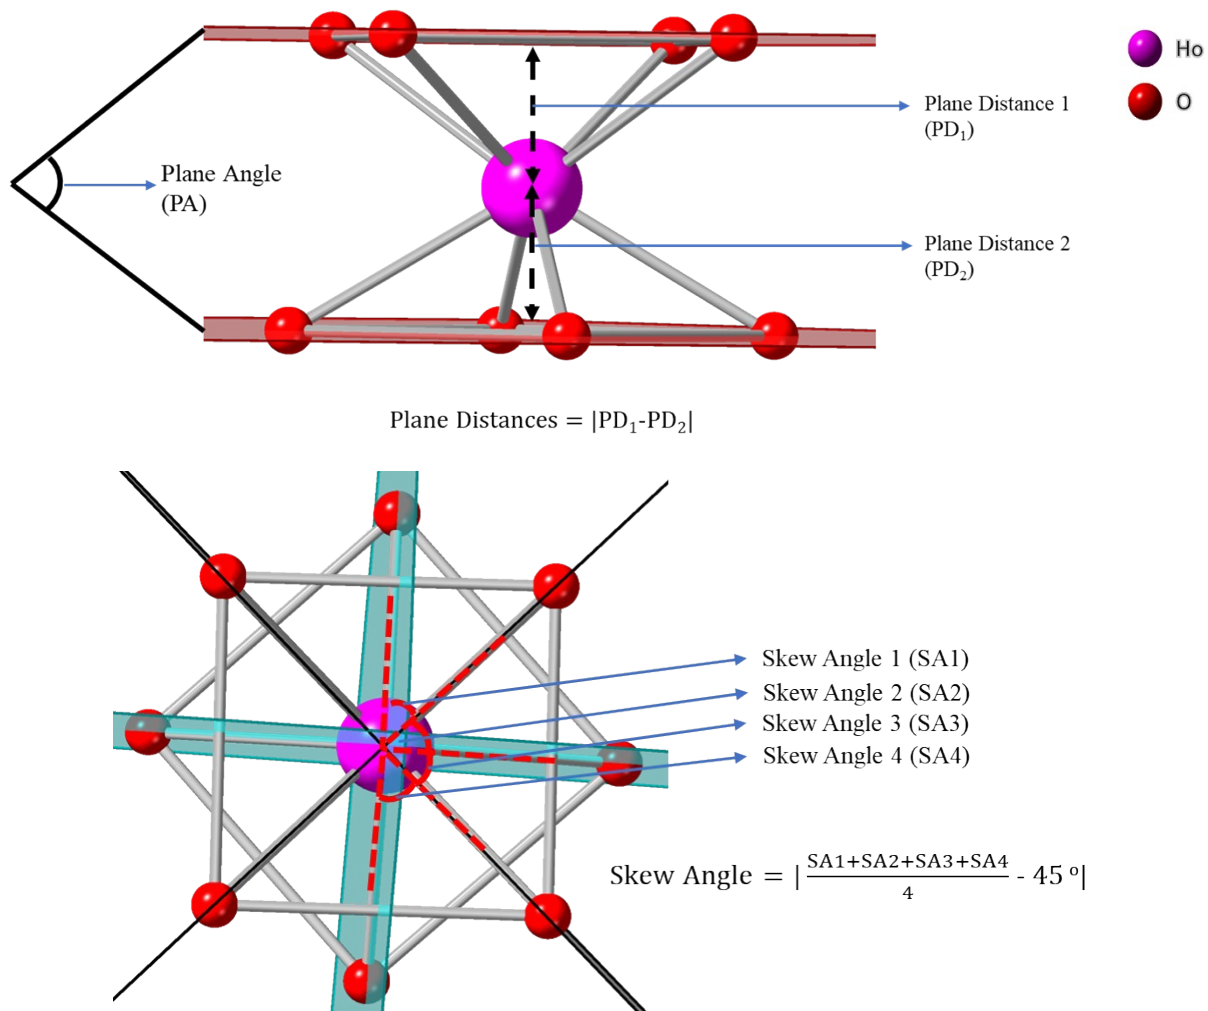

**Figure S4.** Ball and stick representation of the  $\text{HoO}_8$  moiety from the side (**Top**) and a top-down view (**Bottom**) along with calculated planes used to determine structural distortion parameters.

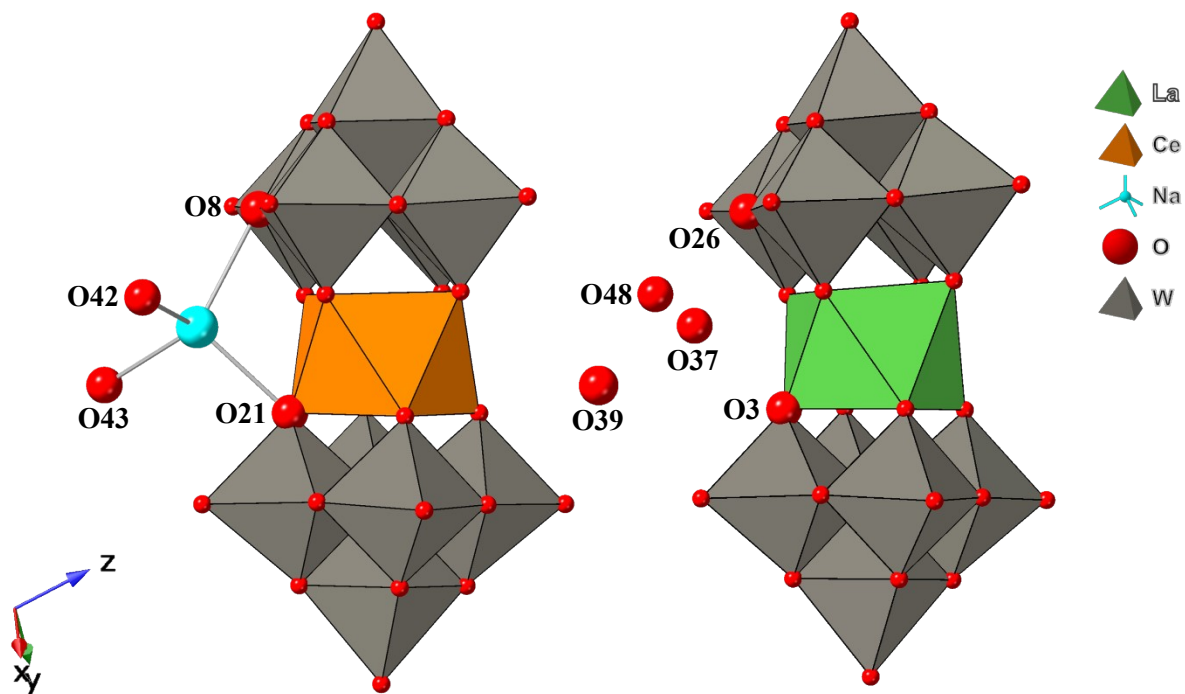

**Figure S5.** Polyhedral representations of complexes **2** ( $\text{CeW}_{10}$ ) and **1** ( $\text{LaW}_{10}$ ) that highlight the unusual tetrahedral coordination geometry of the  $\text{Na(I)}$  cation in **2** and the replacement of this  $\text{Na(I)}$  cation with a lattice water molecule in **1**.

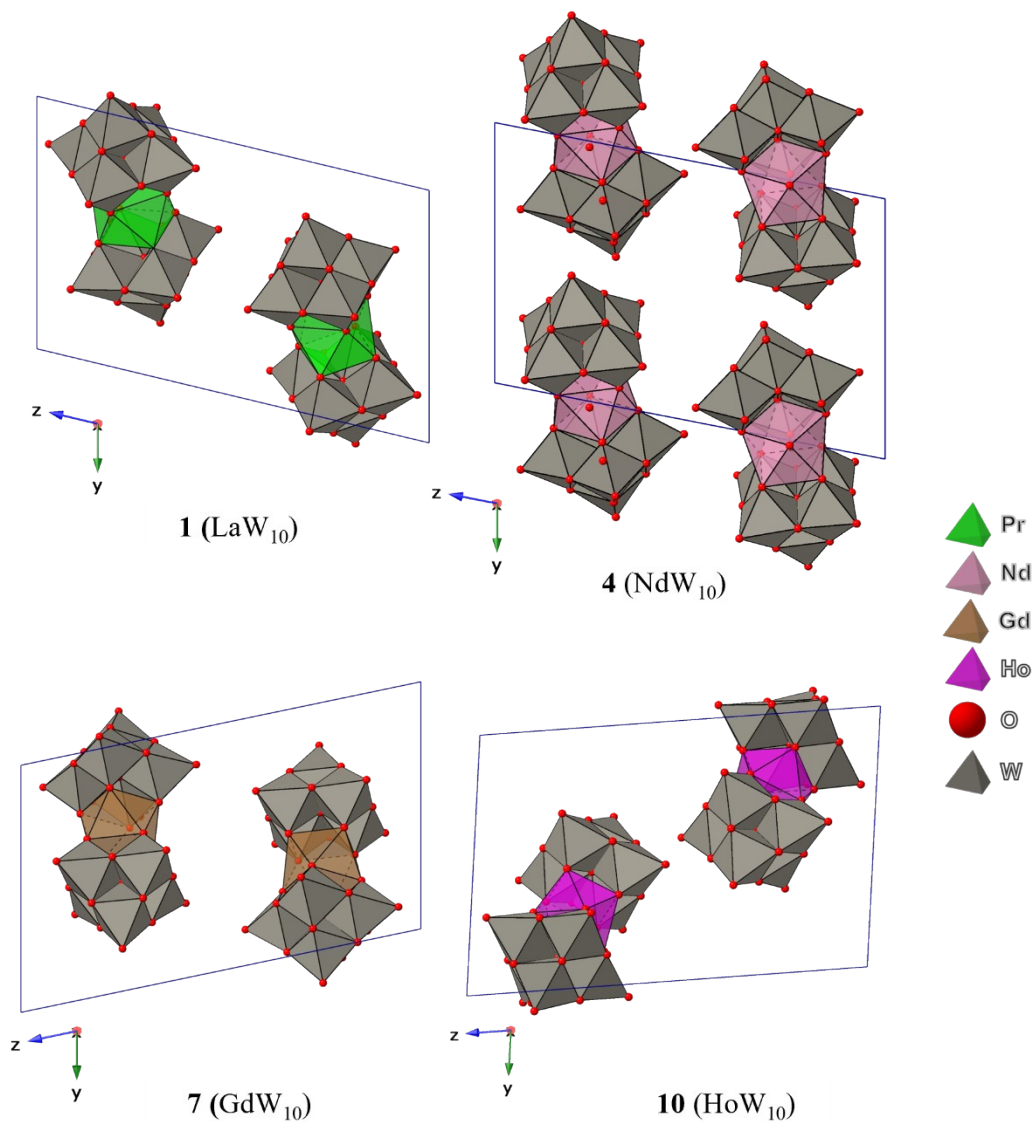

**Figure S6.** Polyhedral representations of **1** ( $\text{LaW}_{10}$ ), **4** ( $\text{NdW}_{10}$ ), **7** ( $\text{GdW}_{10}$ ), and **10** ( $\text{HoW}_{10}$ ) to illustrate cell packing in the different  $\text{LnW}_{10}$  polymorphs. Complex **1** is a representative example of polymorph 1, complex **4** is the only example of polymorph 2, complex **7** is a representative example of polymorph 3, and complex **10** is a representative example of polymorph 4.



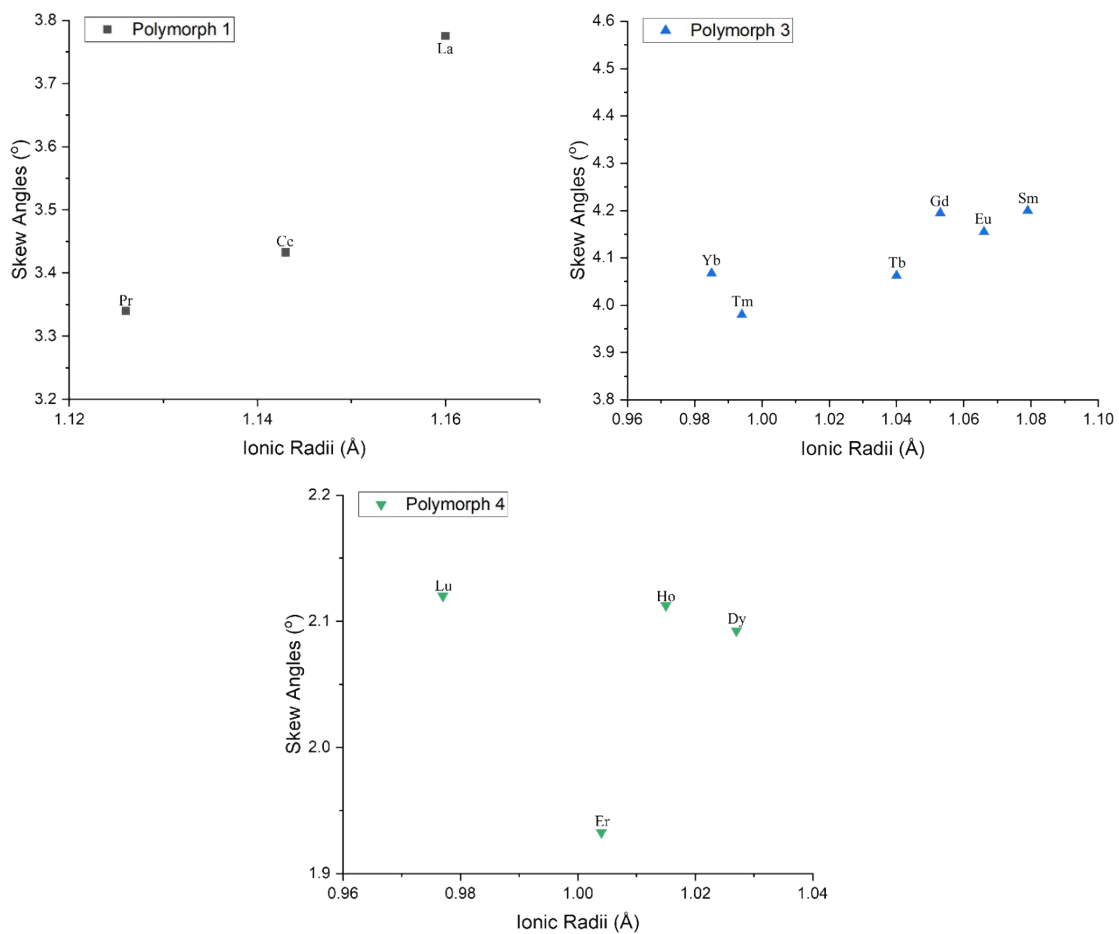

**Figure S7.** Plots of SAs vs. lanthanide ionic radii separated by LnW<sub>10</sub> structural polymorph.

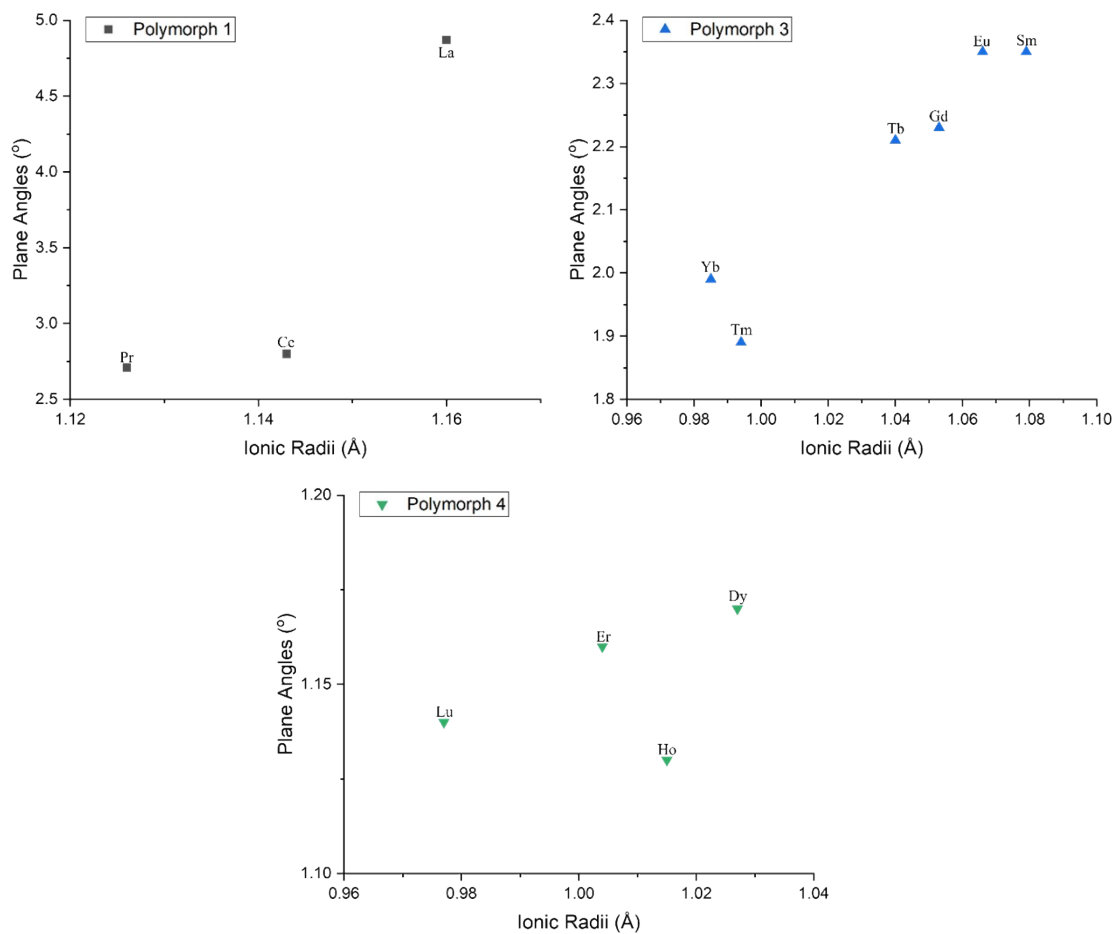

**Figure S8.** Plots of PAs vs. lanthanide ionic radii separated by LnW<sub>10</sub> structural polymorph.

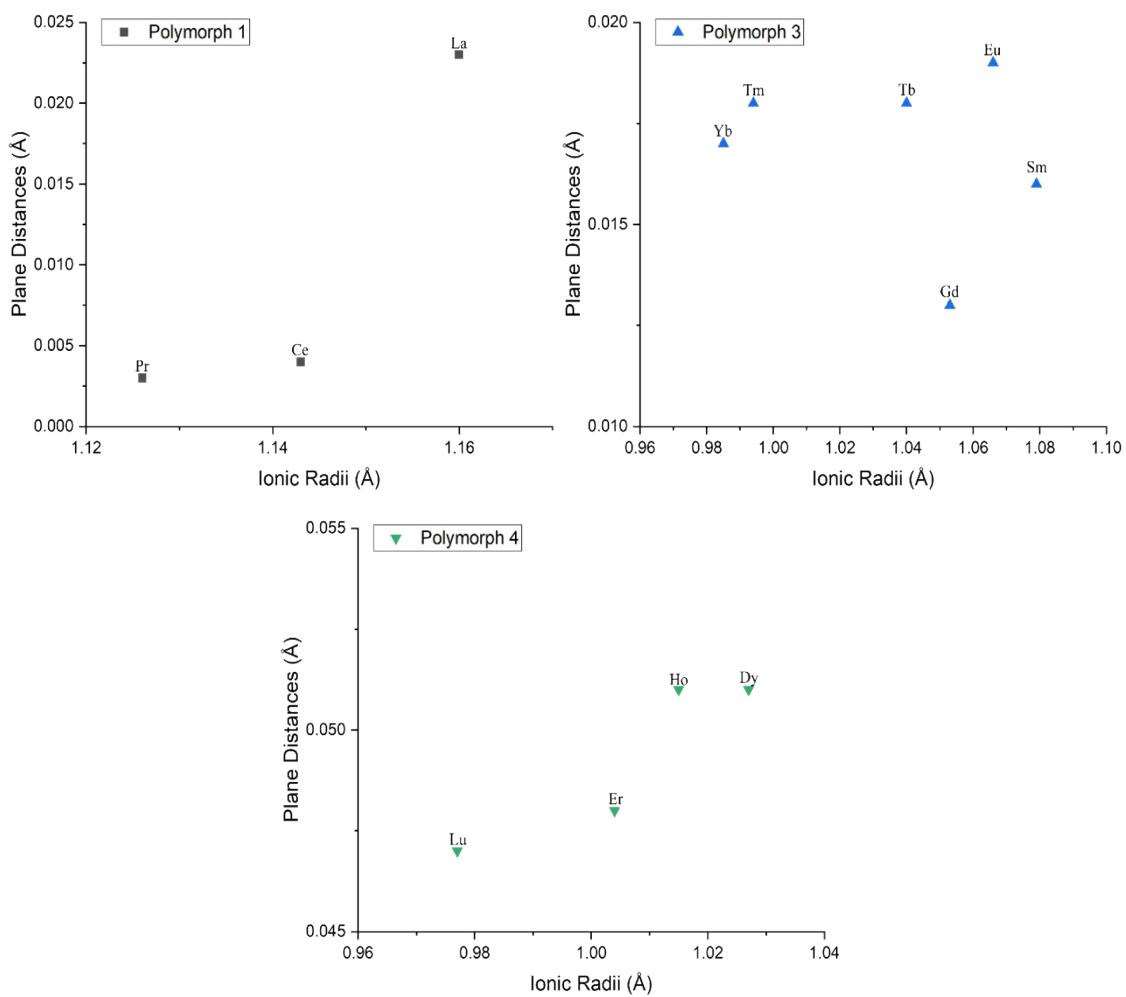

**Figure S9.** Plots of PDs vs. lanthanide ionic radii separated by LnW<sub>10</sub> structural polymorph.

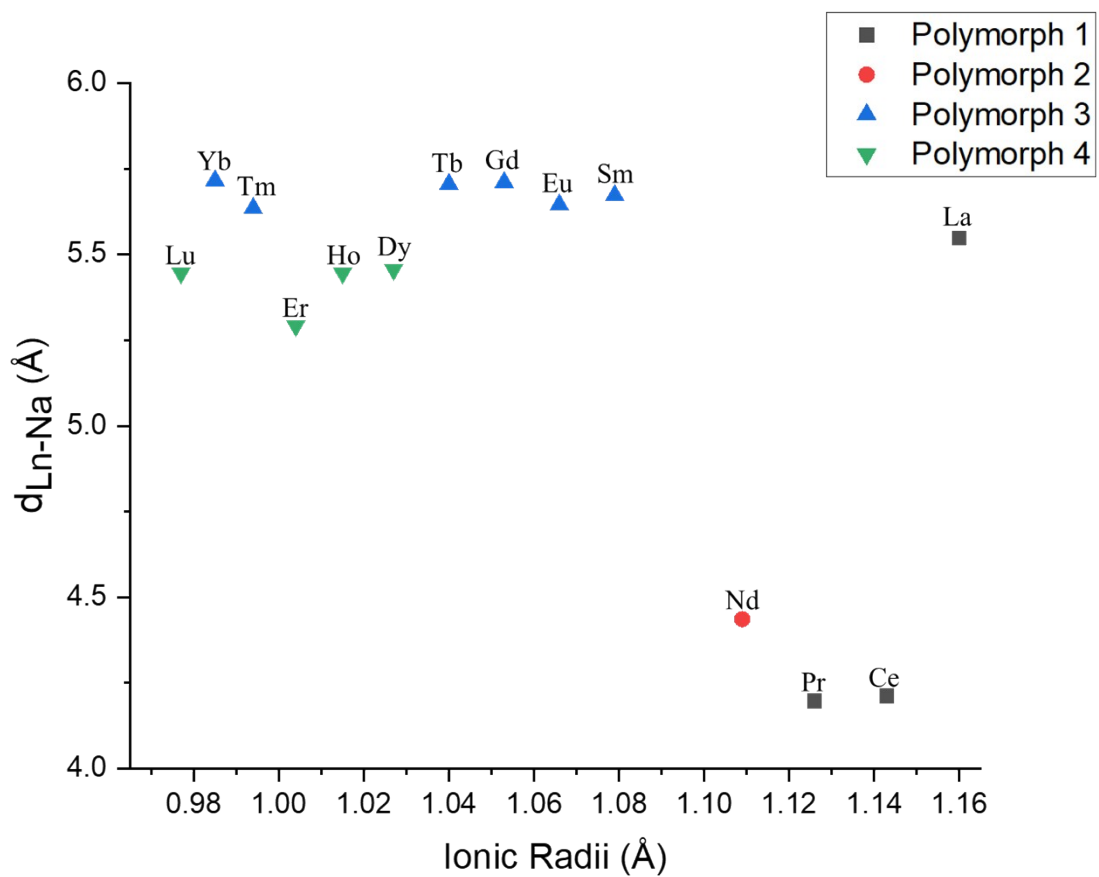

**Figure S10.** Plot of  $d_{\text{Ln-Na}}$  vs. lanthanide ionic radii depicting clear polymorph driven trends in Ln(III)-Na(I) distances.

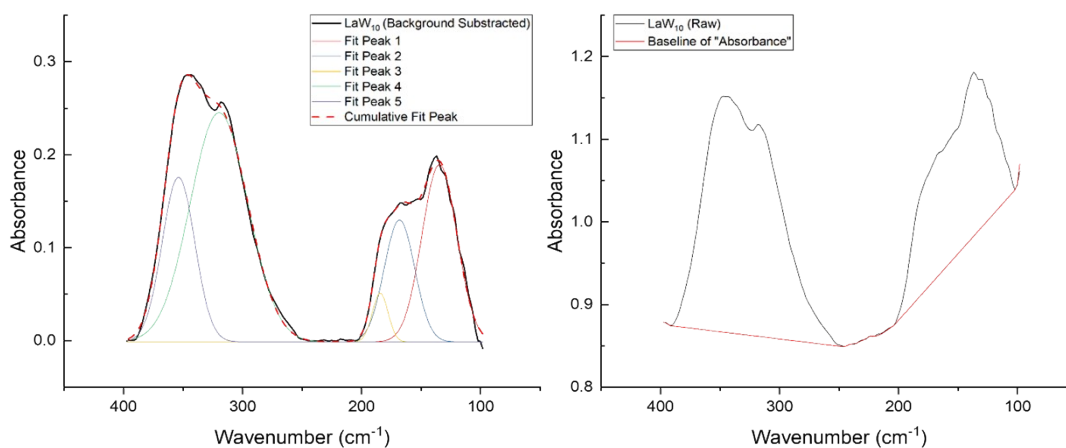

**Figure S11. (Left)** Background subtracted FIR spectrum of complex **1** (LaW<sub>10</sub>) fit to Gaussian functions. **(Right)** Raw FIR spectrum for complex **1** and baseline used for background subtraction.

**Table S3.** Peak fitting parameters for FIR spectrum of complex **1**.

| Model           | Gauss                                                |                         |                         |                         |                         |
|-----------------|------------------------------------------------------|-------------------------|-------------------------|-------------------------|-------------------------|
| Equation        | $y=y_0 + (A/(w*\sqrt{\pi/2}))*\exp(-2*((x-xc)/w)^2)$ |                         |                         |                         |                         |
| Plot            | Peak1<br>(Absorbance)                                | Peak2<br>(Absorbance)   | Peak3<br>(Absorbance)   | Peak4<br>(Absorbance)   | Peak5<br>(Absorbance)   |
| y0              | -0.0014 ±<br>8.84422E-4                              | -0.0014 ±<br>8.84422E-4 | -0.0014 ±<br>8.84422E-4 | -0.0014 ±<br>8.84422E-4 | -0.0014 ±<br>8.84422E-4 |
| xc              | 134.60314 ±<br>0.63564                               | 168.18858 ±<br>1.46285  | 184.39212 ±<br>0.60924  | 319.75397 ±<br>0.96246  | 353.85273 ±<br>0.36267  |
| w               | 29.3108 ±<br>0.80281                                 | 25.59368 ±<br>2.79547   | 13.24783 ±<br>2.32961   | 48.46464 ±<br>1.23053   | 27.46196 ±<br>0.76501   |
| A               | 7.00134 ±<br>0.28039                                 | 4.20582 ±<br>0.6668     | 0.8696 ±<br>0.45422     | 14.97735 ±<br>0.56918   | 6.09223 ±<br>0.50338    |
| Reduced Chi-Sqr | 2.13E-05                                             |                         |                         |                         |                         |
| R-Square (COD)  | 0.99789                                              |                         |                         |                         |                         |
| Adj. R-Square   | 0.99766                                              |                         |                         |                         |                         |

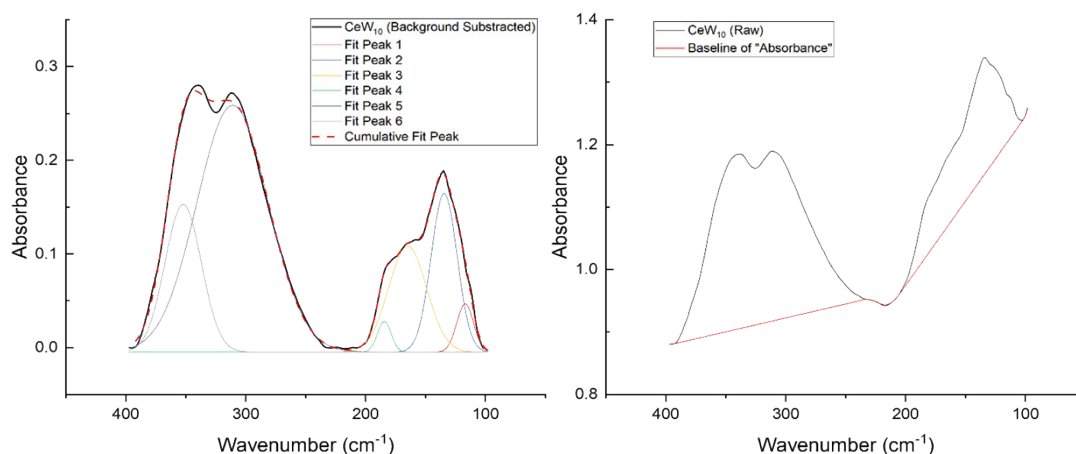

**Figure S12. (Left)** Background subtracted FIR spectrum of complex **2** (CeW<sub>10</sub>) fit to Gaussian functions. **(Right)** Raw FIR spectrum for complex **2** and baseline used for background subtraction.

**Table S4.** Peak fitting parameters for FIR spectrum of complex **2**.

| Model           | Gauss                                                |                        |                        |                        |                       |                        |
|-----------------|------------------------------------------------------|------------------------|------------------------|------------------------|-----------------------|------------------------|
| Equation        | $y=y_0 + (A/(w*\sqrt{\pi/2}))*\exp(-2*((x-xc)/w)^2)$ |                        |                        |                        |                       |                        |
| Plot            | Peak1<br>(Absorbance)                                | Peak2<br>(Absorbance)  | Peak3<br>(Absorbance)  | Peak4<br>(Absorbance)  | Peak5<br>(Absorbance) | Peak6<br>(Absorbance)  |
| y0              | -0.00474 ±<br>0.0012                                 | -0.00474 ±<br>0.0012   | -0.00474 ±<br>0.0012   | -0.00474 ±<br>0.0012   | -0.00474 ±<br>0.0012  | -0.00474 ±<br>0.0012   |
| xc              | 116.98744 ±<br>1.49648                               | 134.52474 ±<br>0.81322 | 164.95805 ±<br>2.04858 | 184.42907 ±<br>0.66011 | 311.03222 ±<br>0.7547 | 352.22405 ±<br>0.29375 |
| w               | 14.04169 ±<br>2.05722                                | 21.67149 ±<br>2.5111   | 31.80234 ±<br>2.45201  | 11.42623 ±<br>1.78541  | 59.51296 ±<br>1.16467 | 30.34262 ±<br>0.7528   |
| A               | 0.90283 ±<br>0.47704                                 | 4.59578 ±<br>0.8435    | 4.49624 ±<br>0.46849   | 0.46714 ±<br>0.14164   | 19.63896 ±<br>0.54136 | 5.99036 ±<br>0.4028    |
| Reduced Chi-Sqr | 1.64E-05                                             |                        |                        |                        |                       |                        |
| R-Square (COD)  | 0.99838                                              |                        |                        |                        |                       |                        |
| Adj. R-Square   | 0.99817                                              |                        |                        |                        |                       |                        |

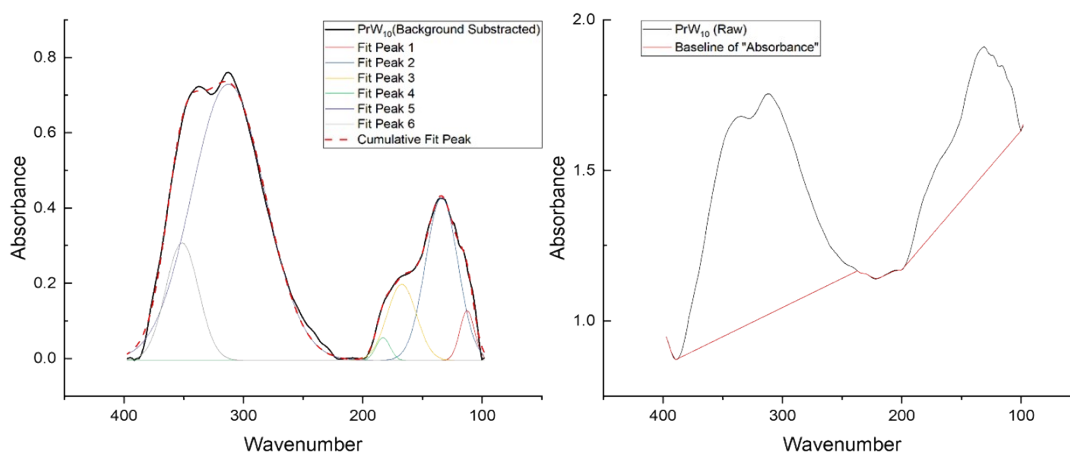

**Figure S13. (Left)** Background subtracted FIR spectrum of complex **3** (PrW<sub>10</sub>) fit to Gaussian functions. **(Right)** Raw FIR spectrum for complex **3** and baseline used for background subtraction.

**Table S5.** Peak fitting parameters for FIR spectrum of complex **3**.

| Model           | Gauss                                                |                        |                        |                        |                        |                        |
|-----------------|------------------------------------------------------|------------------------|------------------------|------------------------|------------------------|------------------------|
| Equation        | $y=y_0 + (A/(w*\sqrt{\pi/2}))*\exp(-2*((x-xc)/w)^2)$ |                        |                        |                        |                        |                        |
| Plot            | Peak1<br>(Absorbance)                                | Peak2<br>(Absorbance)  | Peak3<br>(Absorbance)  | Peak4<br>(Absorbance)  | Peak5<br>(Absorbance)  | Peak6<br>(Absorbance)  |
| y0              | -0.0051 ±<br>0.00407                                 | -0.0051 ±<br>0.00407   | -0.0051 ±<br>0.00407   | -0.0051 ±<br>0.00407   | -0.0051 ±<br>0.00407   | -0.0051 ±<br>0.00407   |
| xc              | 112.63727 ±<br>0.64668                               | 133.93395 ±<br>0.75763 | 167.36581 ±<br>2.80262 | 183.10611 ±<br>1.39164 | 312.64138 ±<br>0.85687 | 351.44096 ±<br>0.33357 |
| w               | 12.21461 ±<br>2.28844                                | 27.04648 ±<br>3.55909  | 24.53185 ±<br>5.56952  | 11.72703 ±<br>5.01449  | 61.47865 ±<br>1.3651   | 27.5978 ±<br>1.27906   |
| A               | 2.01955 ±<br>0.96703                                 | 14.64679 ±<br>2.10448  | 6.21613 ±<br>2.02878   | 0.88837 ± 1.0223       | 56.55994 ±<br>1.79103  | 10.7953 ±<br>1.22373   |
| Reduced Chi-Sqr | 1.97E-04                                             |                        |                        |                        |                        |                        |
| R-Square (COD)  | 0.99724                                              |                        |                        |                        |                        |                        |
| Adj. R-Square   | 0.99687                                              |                        |                        |                        |                        |                        |

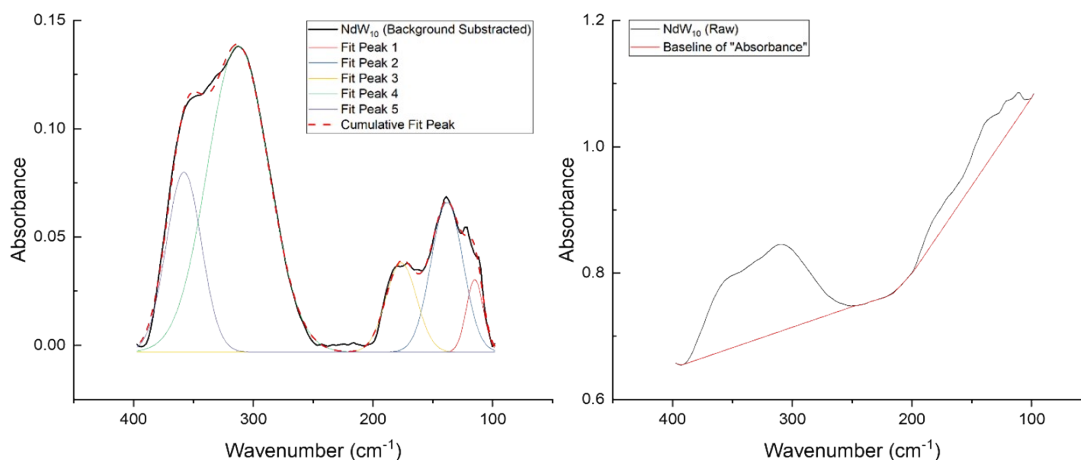

**Figure S14. (Left)** Background subtracted FIR spectrum of complex **4** (NdW<sub>10</sub>) fit to Gaussian functions. **(Right)** Raw FIR spectrum for complex **4** and baseline used for background subtraction.

**Table S6.** Peak fitting parameters for FIR spectrum of complex **4**.

| Model           | Gauss                                                |                          |                          |                          |                          |
|-----------------|------------------------------------------------------|--------------------------|--------------------------|--------------------------|--------------------------|
| Equation        | $y=y_0 + (A/(w*\sqrt{\pi/2}))*\exp(-2*((x-xc)/w)^2)$ |                          |                          |                          |                          |
| Plot            | Peak1<br>(Absorbance)                                | Peak2<br>(Absorbance)    | Peak3<br>(Absorbance)    | Peak4<br>(Absorbance)    | Peak5<br>(Absorbance)    |
| y <sub>0</sub>  | -0.00313 ±<br>4.89231E-4                             | -0.00313 ±<br>4.89231E-4 | -0.00313 ±<br>4.89231E-4 | -0.00313 ±<br>4.89231E-4 | -0.00313 ±<br>4.89231E-4 |
| xc              | 115.02762 ±<br>0.56828                               | 138.16236 ±<br>0.55437   | 176.37358 ±<br>0.80743   | 312.77532 ±<br>0.38157   | 357.98769 ±<br>0.32613   |
| w               | 14.05863 ±<br>1.15648                                | 26.72646 ±<br>1.97711    | 25.77504 ±<br>1.3446     | 50.96735 ±<br>0.66997    | 29.25358 ±<br>0.54115    |
| A               | 0.58904 ±<br>0.11468                                 | 2.31367 ±<br>0.17189     | 1.32884 ±<br>0.08831     | 9.03162 ±<br>0.14064     | 3.04304 ±<br>0.11015     |
| Reduced Chi-Sqr | 5.12E-06                                             |                          |                          |                          |                          |
| R-Square (COD)  | 0.99782                                              |                          |                          |                          |                          |
| Adj. R-Square   | 0.99759                                              |                          |                          |                          |                          |



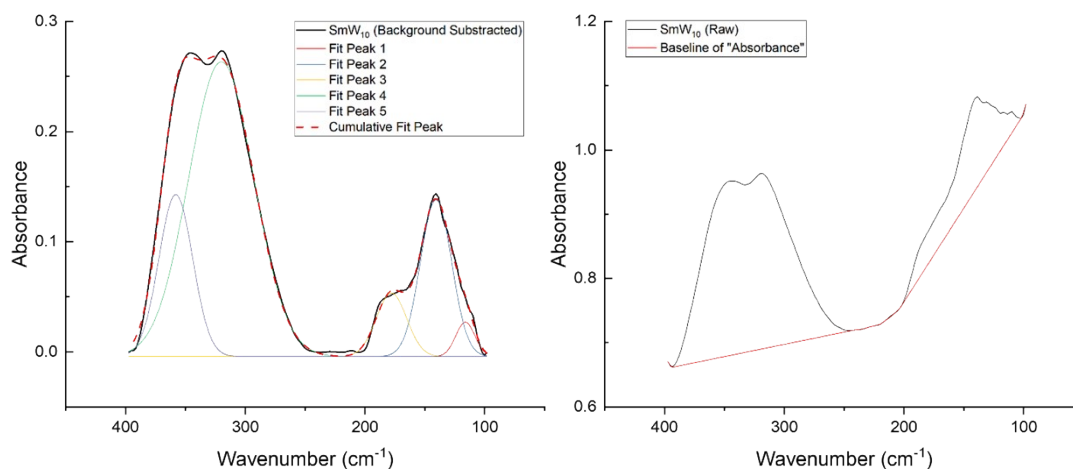

**Figure S15.** (Left) Background subtracted FIR spectrum of complex **5** (SmW<sub>10</sub>) fit to Gaussian functions. (Right) Raw FIR spectrum for complex **5** and baseline used for background subtraction.

**Table S7.** Peak fitting parameters for FIR spectrum of complex **5**.

| Model           | Gauss                                                  |                          |                          |                          |                          |
|-----------------|--------------------------------------------------------|--------------------------|--------------------------|--------------------------|--------------------------|
| Equation        | $y=y_0 + (A/(w*\sqrt{\pi/2})) * \exp(-2*((x-xc)/w)^2)$ |                          |                          |                          |                          |
| Plot            | Peak1<br>(Absorbance)                                  | Peak2<br>(Absorbance)    | Peak3<br>(Absorbance)    | Peak4<br>(Absorbance)    | Peak5<br>(Absorbance)    |
| y0              | -0.00426 ±<br>8.54812E-4                               | -0.00426 ±<br>8.54812E-4 | -0.00426 ±<br>8.54812E-4 | -0.00426 ±<br>8.54812E-4 | -0.00426 ±<br>8.54812E-4 |
| xc              | 116.22436 ±<br>1.39676                                 | 140.72246 ±<br>0.44826   | 177.89623 ±<br>0.95092   | 320.09039 ±<br>0.63736   | 358.09169 ±<br>0.28033   |
| w               | 15.90813 ±<br>2.1656                                   | 26.03707 ±<br>1.55338    | 25.36484 ±<br>1.59339    | 54.46696 ±<br>0.91398    | 28.30262 ±<br>0.70443    |
| A               | 0.62254 ±<br>0.19731                                   | 4.64274 ±<br>0.28435     | 1.82831 ±<br>0.14778     | 18.27035 ±<br>0.43004    | 5.21411 ±<br>0.34913     |
| Reduced Chi-Sqr | 1.37E-05                                               |                          |                          |                          |                          |
| R-Square (COD)  | 0.99863                                                |                          |                          |                          |                          |
| Adj. R-Square   | 0.99849                                                |                          |                          |                          |                          |

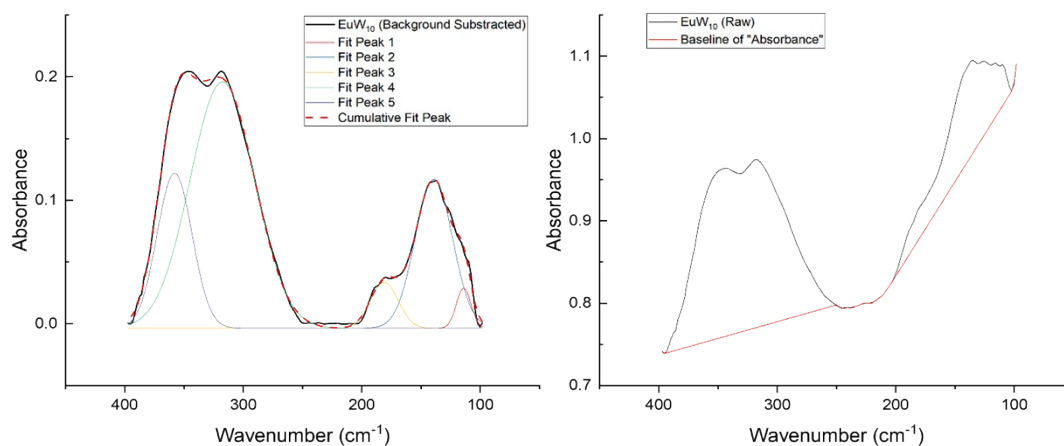

**Figure S16. (Left)** Background subtracted FIR spectrum of complex **6** (EuW<sub>10</sub>) fit to Gaussian functions. **(Right)** Raw FIR spectrum for complex **6** and baseline used for background subtraction.

**Table S8.** Peak fitting parameters for FIR spectrum of complex **6**.

| Model           | Gauss                                                |                          |                          |                          |                          |
|-----------------|------------------------------------------------------|--------------------------|--------------------------|--------------------------|--------------------------|
| Equation        | $y=y_0 + (A/(w*\sqrt{\pi/2}))*\exp(-2*((x-xc)/w)^2)$ |                          |                          |                          |                          |
| Plot            | Peak1<br>(Absorbance)                                | Peak2<br>(Absorbance)    | Peak3<br>(Absorbance)    | Peak4<br>(Absorbance)    | Peak5<br>(Absorbance)    |
| y0              | -0.00371 ±<br>6.40253E-4                             | -0.00371 ±<br>6.40253E-4 | -0.00371 ±<br>6.40253E-4 | -0.00371 ±<br>6.40253E-4 | -0.00371 ±<br>6.40253E-4 |
| xc              | 114.04848 ±<br>0.4117                                | 139.17813 ±<br>0.32718   | 181.01946 ±<br>0.77641   | 317.65023 ±<br>0.58243   | 357.96983 ±<br>0.28352   |
| w               | 12.41008 ±<br>1.27069                                | 31.46092 ±<br>1.18916    | 23.43034 ±<br>1.37347    | 54.36737 ±<br>0.8599     | 29.56028 ±<br>0.57944    |
| A               | 0.504 ± 0.10143                                      | 4.75696 ±<br>0.16315     | 1.0918 ±<br>0.08244      | 13.58813 ±<br>0.29225    | 4.65387 ±<br>0.23946     |
| Reduced Chi-Sqr | 7.91E-06                                             |                          |                          |                          |                          |
| R-Square (COD)  | 0.99861                                              |                          |                          |                          |                          |
| Adj. R-Square   | 0.99846                                              |                          |                          |                          |                          |

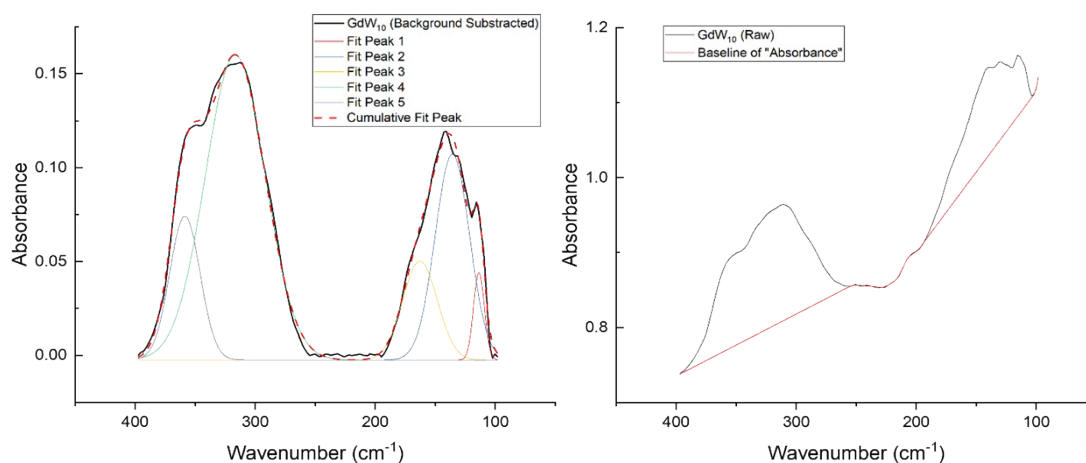

**Figure S17. (Left)** Background subtracted FIR spectrum of complex 7 (GdW<sub>10</sub>) fit to Gaussian functions. **(Right)** Raw FIR spectrum for complex 7 and baseline used for background subtraction.

**Table S9.** Peak fitting parameters for FIR spectrum of complex 7.

| Model           | Gauss                                                  |                          |                          |                          |                          |
|-----------------|--------------------------------------------------------|--------------------------|--------------------------|--------------------------|--------------------------|
| Equation        | $y=y_0 + (A/(w*\sqrt{\pi/2})) * \exp(-2*((x-xc)/w)^2)$ |                          |                          |                          |                          |
| Plot            | Peak1<br>(Absorbance)                                  | Peak2<br>(Absorbance)    | Peak3<br>(Absorbance)    | Peak4<br>(Absorbance)    | Peak5<br>(Absorbance)    |
| y0              | -0.00249 ±<br>5.70065E-4                               | -0.00249 ±<br>5.70065E-4 | -0.00249 ±<br>5.70065E-4 | -0.00249 ±<br>5.70065E-4 | -0.00249 ±<br>5.70065E-4 |
| xc              | 113.65861 ±<br>0.23796                                 | 135.7411 ±<br>1.96707    | 162.71632 ±<br>4.31788   | 316.56981 ±<br>0.42085   | 358.5971 ±<br>0.36933    |
| w               | 9.01536 ±<br>0.77988                                   | 28.65306 ±<br>2.58527    | 28.80401 ±<br>3.46352    | 49.89736 ±<br>0.75635    | 25.28882 ±<br>0.73178    |
| A               | 0.52627 ±<br>0.08026                                   | 3.93905 ±<br>0.72087     | 1.90201 ±<br>0.66725     | 10.1528 ±<br>0.17404     | 2.42981 ±<br>0.13531     |
| Reduced Chi-Sqr | 9.77E-06                                               |                          |                          |                          |                          |
| R-Square (COD)  | 0.99704                                                |                          |                          |                          |                          |
| Adj. R-Square   | 0.99672                                                |                          |                          |                          |                          |

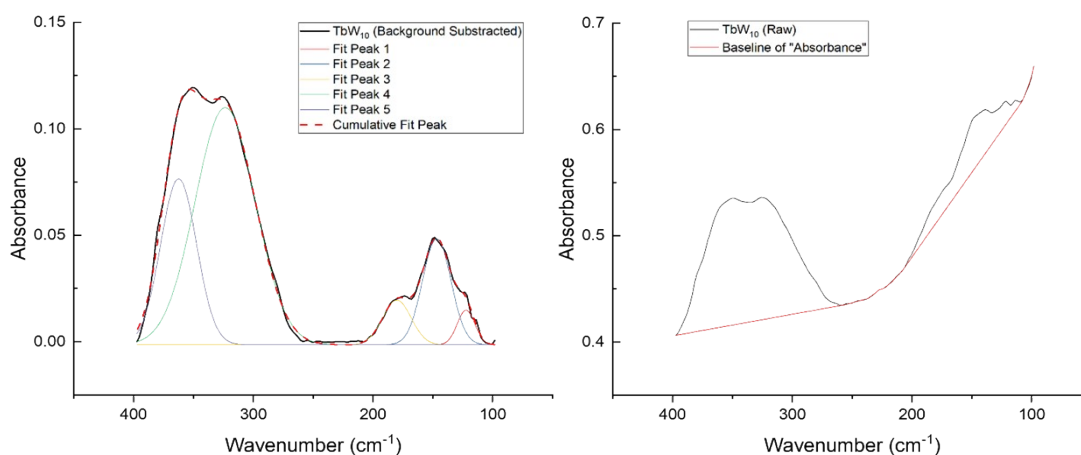

**Figure S18. (Left)** Background subtracted FIR spectrum of complex **8** (TbW<sub>10</sub>) fit to Gaussian functions. **(Right)** Raw FIR spectrum for complex **8** and baseline used for background subtraction.

**Table S10.** Peak fitting parameters for FIR spectrum of complex **8**.

| Model           | Gauss                                                  |                          |                          |                          |                          |
|-----------------|--------------------------------------------------------|--------------------------|--------------------------|--------------------------|--------------------------|
| Equation        | $y=y_0 + (A/(w*\sqrt{\pi/2})) * \exp(-2*((x-xc)/w)^2)$ |                          |                          |                          |                          |
| Plot            | Peak1<br>(Absorbance)                                  | Peak2<br>(Absorbance)    | Peak3<br>(Absorbance)    | Peak4<br>(Absorbance)    | Peak5<br>(Absorbance)    |
| y0              | -0.00146 ±<br>3.28384E-4                               | -0.00146 ±<br>3.28384E-4 | -0.00146 ±<br>3.28384E-4 | -0.00146 ±<br>3.28384E-4 | -0.00146 ±<br>3.28384E-4 |
| xc              | 122.30456 ±<br>1.01282                                 | 146.77592 ±<br>0.42215   | 180.02558 ±<br>1.21431   | 323.52819 ±<br>0.63728   | 362.39681 ±<br>0.3443    |
| w               | 14.74442 ±<br>1.58728                                  | 23.75945 ±<br>1.65697    | 23.78321 ±<br>1.94549    | 50.16757 ±<br>0.86906    | 30.08413 ±<br>0.56683    |
| A               | 0.30054 ±<br>0.06209                                   | 1.48346 ±<br>0.10407     | 0.6241 ±<br>0.06576      | 7.00648 ±<br>0.17108     | 2.93772 ±<br>0.15106     |
| Reduced Chi-Sqr | 2.83E-06                                               |                          |                          |                          |                          |
| R-Square (COD)  | 0.99853                                                |                          |                          |                          |                          |
| Adj. R-Square   | 0.99837                                                |                          |                          |                          |                          |

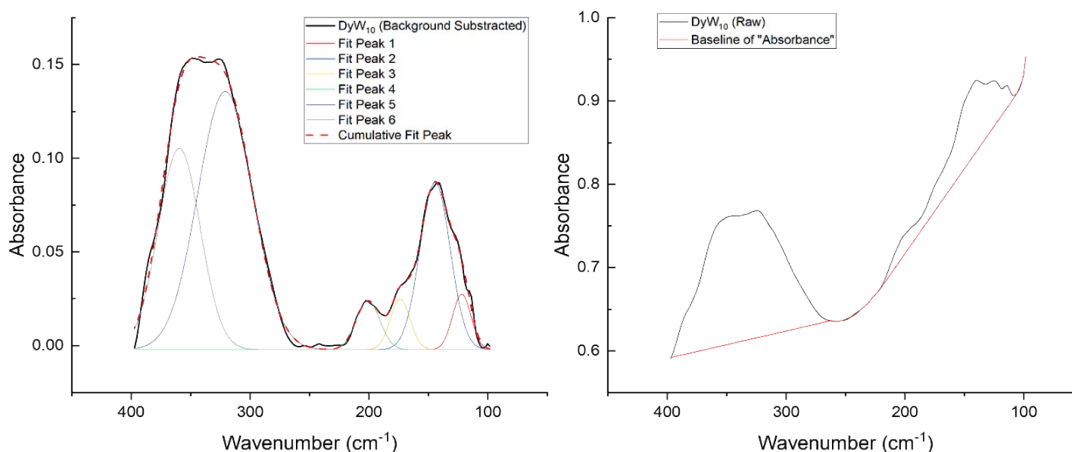

**Figure S19. (Left)** Background subtracted FIR spectrum of complex **9** ( $\text{DyW}_{10}$ ) fit to Gaussian functions. **(Right)** Raw FIR spectrum for complex **9** and baseline used for background subtraction.

**Table S11.** Peak fitting parameters for FIR spectrum of complex **9**.

| Model           | Gauss                                                        |                                  |                                  |                                  |                                  |                                  |
|-----------------|--------------------------------------------------------------|----------------------------------|----------------------------------|----------------------------------|----------------------------------|----------------------------------|
| Equation        | $y=y_0 + (A/(w*\text{sqrt}(\pi/2))) * \exp(-2*((x-xc)/w)^2)$ |                                  |                                  |                                  |                                  |                                  |
| Plot            | Peak1<br>(Absorbance)                                        | Peak2<br>(Absorbance)            | Peak3<br>(Absorbance)            | Peak4<br>(Absorbance)            | Peak5<br>(Absorbance)            | Peak6<br>(Absorbance)            |
| $y_0$           | $-0.00213 \pm 6.46906\text{E-}4$                             | $-0.00213 \pm 6.46906\text{E-}4$ | $-0.00213 \pm 6.46906\text{E-}4$ | $-0.00213 \pm 6.46906\text{E-}4$ | $-0.00213 \pm 6.46906\text{E-}4$ | $-0.00213 \pm 6.46906\text{E-}4$ |
| $xc$            | $121.9704 \pm 1.56489$                                       | $144.44177 \pm 0.84121$          | $173.75754 \pm 1.32494$          | $200.81162 \pm 0.98586$          | $320.93881 \pm 1.20959$          | $359.61223 \pm 0.91668$          |
| $w$             | $15.56715 \pm 2.21373$                                       | $25.38535 \pm 3.11543$           | $16.60195 \pm 2.89743$           | $19.91491 \pm 1.9612$            | $46.2854 \pm 1.37878$            | $35.24128 \pm 0.93525$           |
| $A$             | $0.57633 \pm 0.2486$                                         | $2.83554 \pm 0.36035$            | $0.56137 \pm 0.15867$            | $0.64874 \pm 0.0679$             | $7.9902 \pm 0.41627$             | $4.74341 \pm 0.38777$            |
| Reduced Chi-Sqr | 7.99E-06                                                     |                                  |                                  |                                  |                                  |                                  |
| R-Square (COD)  | 0.99747                                                      |                                  |                                  |                                  |                                  |                                  |
| Adj. R-Square   | 0.99713                                                      |                                  |                                  |                                  |                                  |                                  |

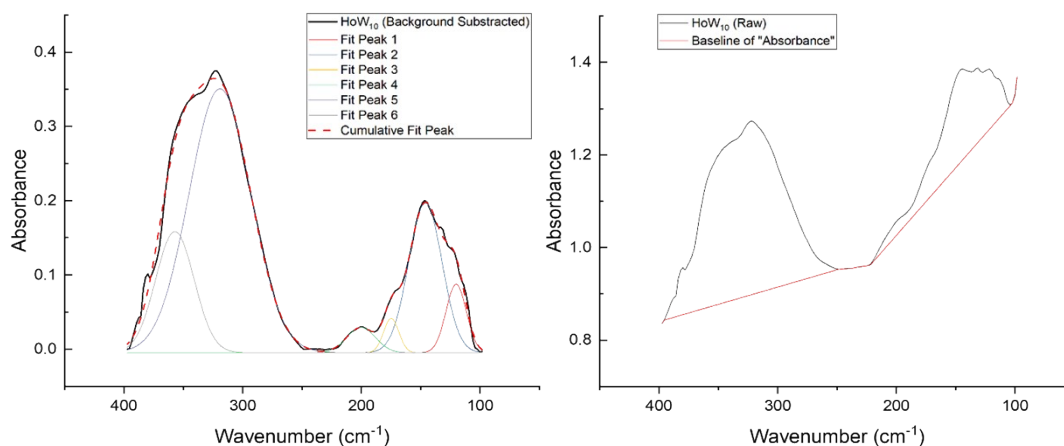

**Figure S20.** (Left) Background subtracted FIR spectrum of complex **10** (HoW<sub>10</sub>) fit to Gaussian functions. (Right) Raw FIR spectrum for complex **10** and baseline used for background subtraction.

**Table S12.** Peak fitting parameters for FIR spectrum of complex **10**.

| Model           | Gauss                                                |                     |                     |                     |                     |                     |
|-----------------|------------------------------------------------------|---------------------|---------------------|---------------------|---------------------|---------------------|
| Equation        | $y=y_0 + (A/(w*\sqrt{\pi/2}))*\exp(-2*((x-xc)/w)^2)$ |                     |                     |                     |                     |                     |
| Plot            | Peak1(Absorbance)                                    | Peak2(Absorbance)   | Peak3(Absorbance)   | Peak4(Absorbance)   | Peak5 (Absorbance)  | Peak6 (Absorbance)  |
| y <sub>0</sub>  | -0.00486 ± 0.00219                                   | -0.00486 ± 0.00219  | -0.00486 ± 0.00219  | -0.00486 ± 0.00219  | -0.00486 ± 0.00219  | -0.00486 ± 0.00219  |
| xc              | 120.1907 ± 1.12981                                   | 146.09711 ± 0.82763 | 174.88177 ± 1.10613 | 200.25038 ± 1.95197 | 319.21037 ± 1.24183 | 357.17141 ± 0.93971 |
| w               | 17.1425 ± 1.67873                                    | 28.12845 ± 2.6777   | 12.93385 ± 2.55664  | 24.27551 ± 4.45292  | 51.90942 ± 1.60047  | 32.40071 ± 1.43206  |
| A               | 1.9829 ± 0.4969                                      | 7.11147 ± 0.6675    | 0.75003 ± 0.26413   | 1.03766 ± 0.20632   | 23.12623 ± 1.12426  | 6.63026 ± 0.96227   |
| Reduced Chi-Sqr | 5.36E-05                                             |                     |                     |                     |                     |                     |
| R-Square (COD)  | 0.9968                                               |                     |                     |                     |                     |                     |
| Adj. R-Square   | 0.99638                                              |                     |                     |                     |                     |                     |

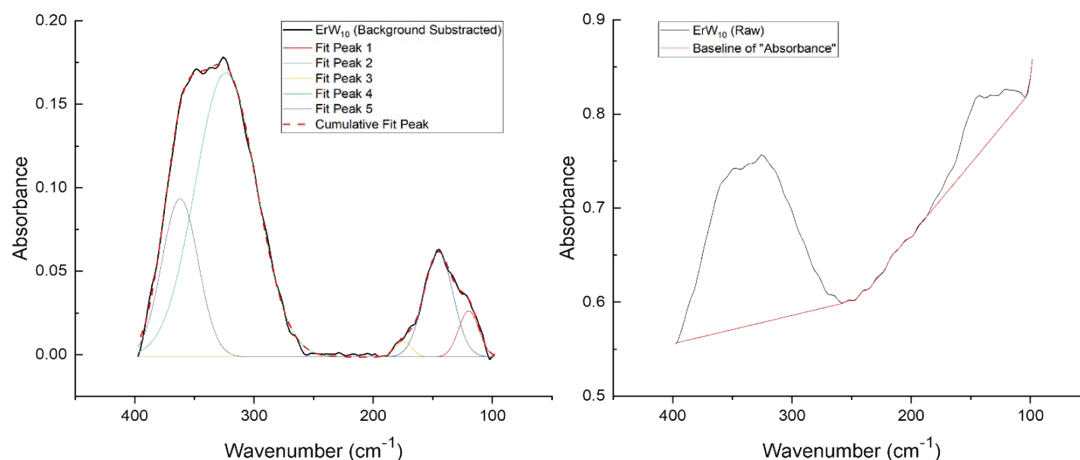

**Figure S21.** (Left) Background subtracted FIR spectrum of complex **11** ( $\text{ErW}_{10}$ ) fit to Gaussian functions. (Right) Raw FIR spectrum for complex **11** and baseline used for background subtraction.

**Table S13.** Peak fitting parameters for FIR spectrum of complex **11**.

| Model           | Gauss                                                |                       |                       |                       |                       |
|-----------------|------------------------------------------------------|-----------------------|-----------------------|-----------------------|-----------------------|
| Equation        | $y=y_0 + (A/(w*\sqrt{\pi/2}))*\exp(-2*((x-xc)/w)^2)$ |                       |                       |                       |                       |
| Plot            | Peak1(Absorbance)                                    | Peak2(Absorbance)     | Peak3(Absorbance)     | Peak4(Absorbance)     | Peak5 (Absorbance)    |
| y0              | -0.00143 ± 3.85681E-4                                | -0.00143 ± 3.85681E-4 | -0.00143 ± 3.85681E-4 | -0.00143 ± 3.85681E-4 | -0.00143 ± 3.85681E-4 |
| xc              | 119.92196 ± 1.0649                                   | 145.31788 ± 0.57166   | 174.70373 ± 1.66646   | 323.68575 ± 0.61227   | 362.05903 ± 0.37225   |
| w               | 16.81096 ± 1.46261                                   | 24.44798 ± 1.67994    | 14.06775 ± 3.01482    | 51.34786 ± 0.79733    | 30.38759 ± 0.65606    |
| A               | 0.58104 ± 0.1003                                     | 1.9242 ± 0.12777      | 0.15817 ± 0.04691     | 10.95733 ± 0.2471     | 3.60895 ± 0.2225      |
| Reduced Chi-Sqr | 4.92E-06                                             |                       |                       |                       |                       |
| R-Square (COD)  | 0.99885                                              |                       |                       |                       |                       |
| Adj. R-Square   | 0.99873                                              |                       |                       |                       |                       |

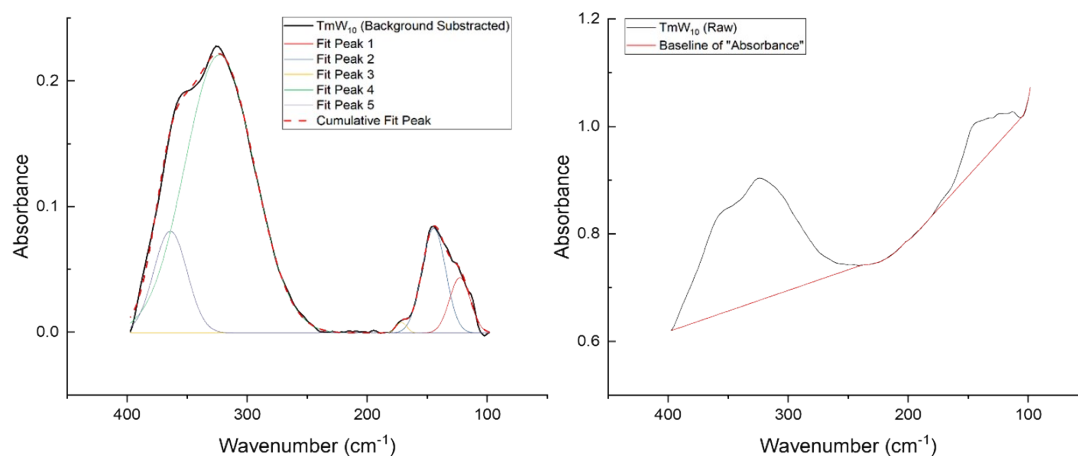

**Figure S22.** (Left) Background subtracted FIR spectrum of complex **12** ( $TmW_{10}$ ) fit to Gaussian functions. (Right) Raw FIR spectrum for complex **12** and baseline used for background subtraction.

**Table S14.** Peak fitting parameters for FIR spectrum of complex **12**.

| Model           | Gauss                                                  |                             |                             |                             |                             |
|-----------------|--------------------------------------------------------|-----------------------------|-----------------------------|-----------------------------|-----------------------------|
| Equation        | $y=y_0 + (A/(w*\sqrt{\pi/2})) * \exp(-2*((x-xc)/w)^2)$ |                             |                             |                             |                             |
| Plot            | Peak1<br>(Absorbance)                                  | Peak2<br>(Absorbance)       | Peak3<br>(Absorbance)       | Peak4<br>(Absorbance)       | Peak5<br>(Absorbance)       |
| y0              | -7.00596E-4 ±<br>4.83621E-4                            | -7.00596E-4 ±<br>4.83621E-4 | -7.00596E-4 ±<br>4.83621E-4 | -7.00596E-4 ±<br>4.83621E-4 | -7.00596E-4 ±<br>4.83621E-4 |
| xc              | 122.87894 ±<br>1.14593                                 | 144.56468 ±<br>0.68456      | 171.55142 ±<br>1.19836      | 323.08478 ±<br>0.46932      | 364.01294 ±<br>0.31328      |
| w               | 17.27628 ±<br>1.41865                                  | 19.71013 ±<br>1.07762       | 8.94121 ±<br>2.48318        | 57.63121 ±<br>0.70642       | 27.7819 ±<br>0.85496        |
| A               | 0.95152 ±<br>0.13912                                   | 2.05338 ±<br>0.14397        | 0.09353 ±<br>0.02657        | 15.98602 ±<br>0.25211       | 2.82232 ±<br>0.20598        |
| Reduced Chi-Sqr | 7.92E-06                                               |                             |                             |                             |                             |
| R-Square (COD)  | 0.99879                                                |                             |                             |                             |                             |
| Adj. R-Square   | 0.99866                                                |                             |                             |                             |                             |



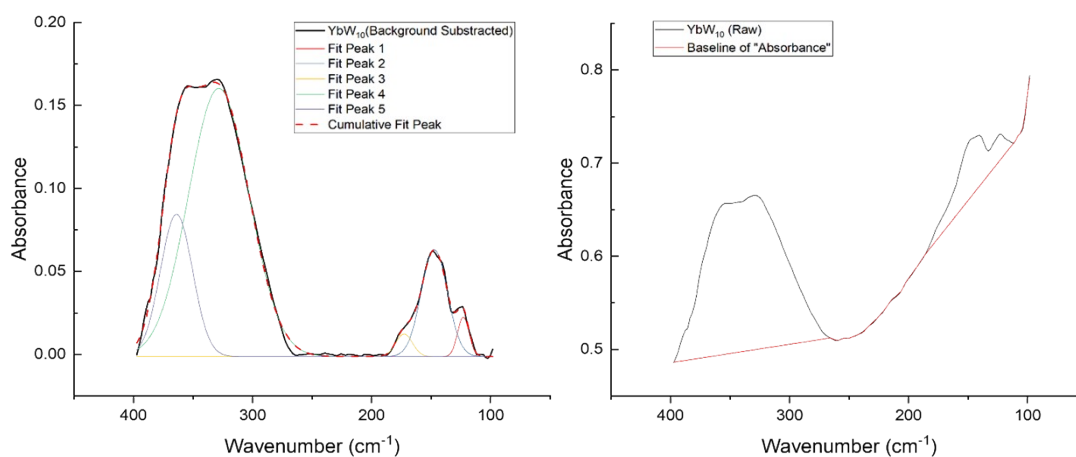

**Figure S23. (Left)** Background subtracted FIR spectrum of complex **13** ( $\text{YbW}_{10}$ ) fit to Gaussian functions. **(Right)** Raw FIR spectrum for complex **13** and baseline used for background subtraction.

**Table S15.** Peak fitting parameters for FIR spectrum of complex **13**.

| Model           | Gauss                                                |                                  |                                  |                                  |                                  |
|-----------------|------------------------------------------------------|----------------------------------|----------------------------------|----------------------------------|----------------------------------|
| Equation        | $y=y_0 + (A/(w*\sqrt{\pi/2}))*\exp(-2*((x-xc)/w)^2)$ |                                  |                                  |                                  |                                  |
| Plot            | Peak1<br>(Absorbance)                                | Peak2<br>(Absorbance)            | Peak3<br>(Absorbance)            | Peak4<br>(Absorbance)            | Peak5<br>(Absorbance)            |
| $y_0$           | $-0.00134 \pm 3.49829\text{E-}4$                     | $-0.00134 \pm 3.49829\text{E-}4$ | $-0.00134 \pm 3.49829\text{E-}4$ | $-0.00134 \pm 3.49829\text{E-}4$ | $-0.00134 \pm 3.49829\text{E-}4$ |
| $xc$            | $122.9998 \pm 0.40101$                               | $147.31932 \pm 0.29823$          | $172.65704 \pm 1.21181$          | $328.40213 \pm 0.63809$          | $363.94635 \pm 0.29856$          |
| $w$             | $9.63044 \pm 0.82639$                                | $21.90544 \pm 0.99567$           | $13.95031 \pm 2.08204$           | $50.77549 \pm 0.84054$           | $27.03132 \pm 0.73279$           |
| $A$             | $0.28605 \pm 0.03117$                                | $1.76656 \pm 0.06742$            | $0.23795 \pm 0.04904$            | $10.28396 \pm 0.24083$           | $2.90389 \pm 0.21352$            |
| Reduced Chi-Sqr | 5.19E-06                                             |                                  |                                  |                                  |                                  |
| R-Square (COD)  | 0.99866                                              |                                  |                                  |                                  |                                  |
| Adj. R-Square   | 0.99851                                              |                                  |                                  |                                  |                                  |

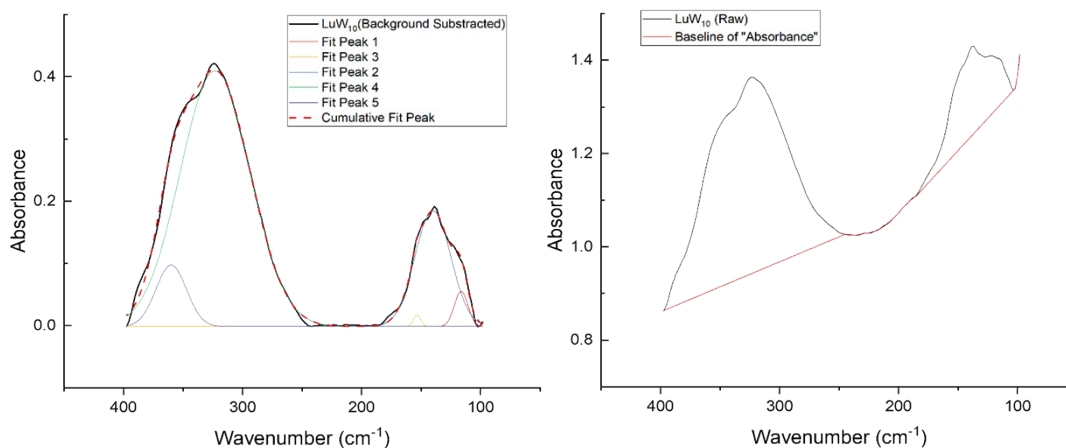

**Figure S24. (Left)** Background subtracted FIR spectrum of complex **14** ( $\text{LuW}_{10}$ ) fit to Gaussian functions. **(Right)** Raw FIR spectrum for complex **14** and baseline used for background subtraction.

**Table S16.** Peak fitting parameters for FIR spectrum of complex **14**.

| Model           | Gauss                                                |                         |                         |                         |                        |
|-----------------|------------------------------------------------------|-------------------------|-------------------------|-------------------------|------------------------|
| Equation        | $y=y_0 + (A/(w*\sqrt{\pi/2}))*\exp(-2*((x-xc)/w)^2)$ |                         |                         |                         |                        |
| Plot            | Peak1<br>(Absorbance)                                | Peak2<br>(Absorbance)   | Peak3<br>(Absorbance)   | Peak4<br>(Absorbance)   | Peak5<br>(Absorbance)  |
| $y_0$           | $-0.00155 \pm 0.0011$                                | $-0.00155 \pm 0.0011$   | $-0.00155 \pm 0.0011$   | $-0.00155 \pm 0.0011$   | $-0.00155 \pm 0.0011$  |
| $xc$            | $116.3922 \pm 0.48106$                               | $140.09621 \pm 0.57959$ | $153.39291 \pm 0.94903$ | $323.06292 \pm 0.58978$ | $360.0016 \pm 0.42479$ |
| $w$             | $11.3516 \pm 1.30668$                                | $30.03854 \pm 0.90127$  | $6.13594 \pm 2.29172$   | $58.64299 \pm 0.84353$  | $25.68943 \pm 1.64303$ |
| $A$             | $0.80194 \pm 0.15786$                                | $7.01015 \pm 0.20642$   | $0.14074 \pm 0.06626$   | $30.18441 \pm 0.59716$  | $3.17751 \pm 0.46578$  |
| Reduced Chi-Sqr | 3.87E-05                                             |                         |                         |                         |                        |
| R-Square (COD)  | 0.99816                                              |                         |                         |                         |                        |
| Adj. R-Square   | 0.99796                                              |                         |                         |                         |                        |

**Table S17.** Observed peaks in the FIR spectra for complexes **1- 14**.

| Complex name                   | Observed peaks rounded to the first decimal (cm <sup>-1</sup> ) |
|--------------------------------|-----------------------------------------------------------------|
| <b>1</b> (LaW <sub>10</sub> )  | 134.6, 168.2, 184.4, 319.8, 353.9                               |
| <b>2</b> (CeW <sub>10</sub> )  | 117.0, 134.5, 165.0, 184.4, 311.0, 352.2                        |
| <b>3</b> (PrW <sub>10</sub> )  | 112.6, 133.9, 167.4, 183.1, 312.6, 351.4                        |
| <b>4</b> (NdW <sub>10</sub> )  | 115.0, 138.2, 176.4, 312.8, 358.0                               |
| <b>5</b> (SmW <sub>10</sub> )  | 116.2, 140.7, 177.9, 320.1, 358.1                               |
| <b>6</b> (EuW <sub>10</sub> )  | 114.0, 139.2, 181.0, 317.7, 358.0                               |
| <b>7</b> (GdW <sub>10</sub> )  | 113.7, 135.7, 162.7, 316.6, 358.6                               |
| <b>8</b> (TbW <sub>10</sub> )  | 122.3, 146.8, 190.0, 323.5, 362.4                               |
| <b>9</b> (DyW <sub>10</sub> )  | 122.0, 144.4, 173.8, 200.8, 320.9, 359.6                        |
| <b>10</b> (HoW <sub>10</sub> ) | 120.2, 146.1, 174.9, 200.3, 319.2, 357.2                        |
| <b>11</b> (ErW <sub>10</sub> ) | 119.9, 145.3, 174.7, 323.7, 362.1                               |
| <b>12</b> (TmW <sub>10</sub> ) | 122.9, 144.6, 171.6, 323.1, 364.0                               |
| <b>13</b> (YbW <sub>10</sub> ) | 123.0, 147.3, 172.7, 328.4, 363.9                               |
| <b>14</b> (LuW <sub>10</sub> ) | 116.4, 140.1, 153.4, 323.1, 360.0                               |

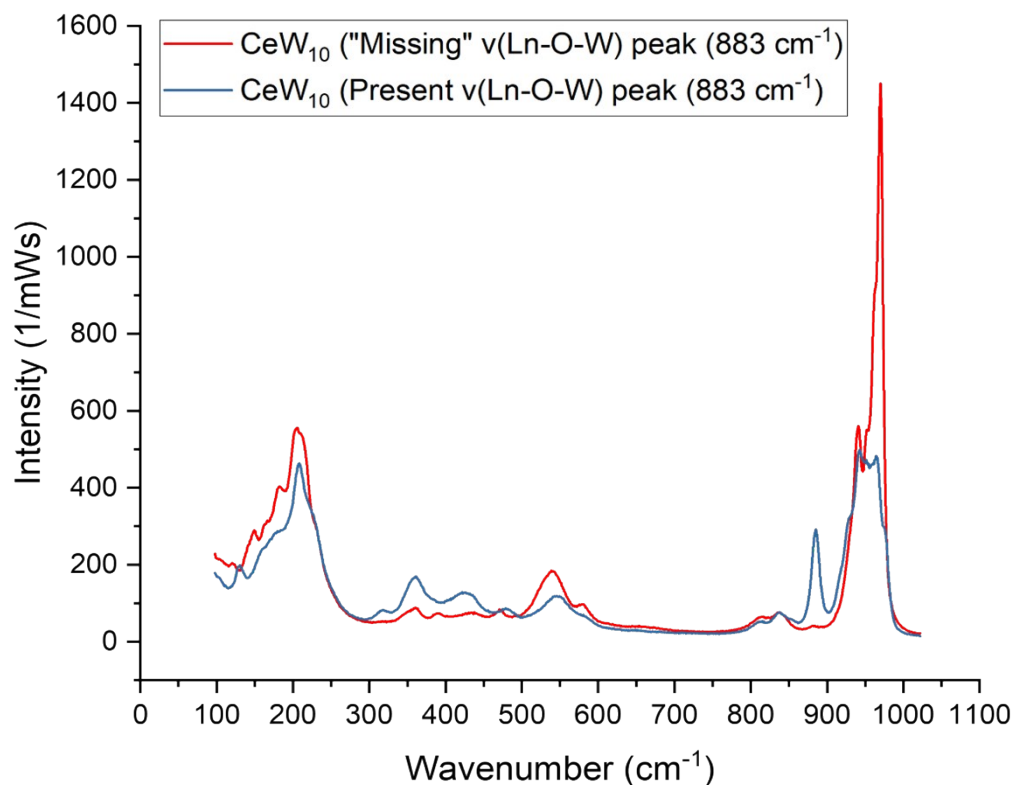

**Figure S25.** Raman spectra of two different crystals of **3** (CeW<sub>10</sub>) that demonstrate fluctuations in peak intensities seen within spectra of different crystals of the same species. This fluctuation is especially pronounced for the peak centered around 888 cm<sup>-1</sup> which has been assigned as the ν(Ln-O-W) mode. Intensity changes are generally indicative of Raman mode polarizability; however, there are not literature examples that suggest this mode is polarizable.<sup>1</sup>

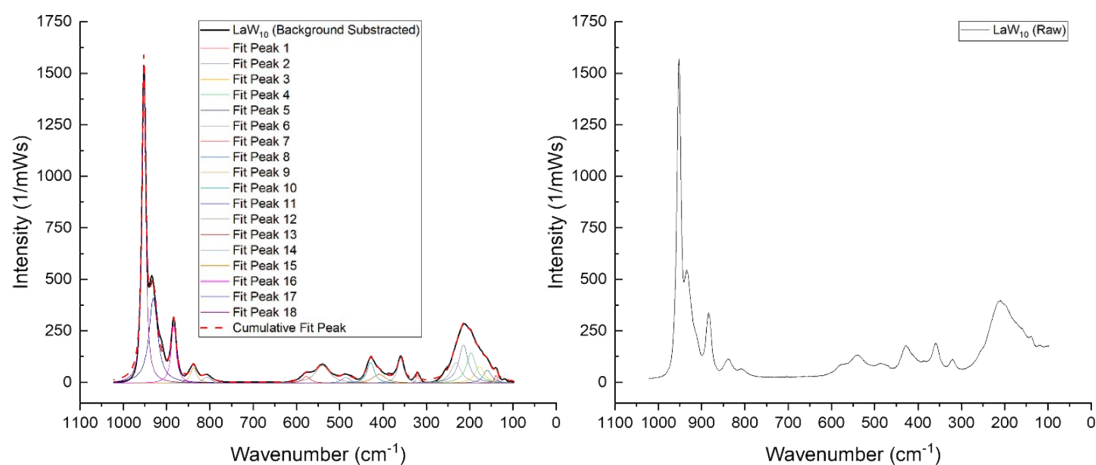

**Figure S26. (Left)** Background subtracted Raman spectrum of complex 1 (LaW<sub>10</sub>) fit to Lorentzian functions. **(Right)** Raw Raman spectrum for complex 1.

**Table S18.** Peak fitting parameters for Raman spectrum of complex 1.

| Model           | Lorentz                                                   |                         |                         |                         |                        |                         |                        |                         |                         |
|-----------------|-----------------------------------------------------------|-------------------------|-------------------------|-------------------------|------------------------|-------------------------|------------------------|-------------------------|-------------------------|
| Equation        | $y = y_0 + (2 * A / \pi) * (w / (4 * (x - x_c)^2 + w^2))$ |                         |                         |                         |                        |                         |                        |                         |                         |
| Plot            | Peak1<br>(Intensity)                                      | Peak2<br>(Intensity)    | Peak3<br>(Intensity)    | Peak4<br>(Intensity)    | Peak5<br>(Intensity)   | Peak6<br>(Intensity)    | Peak7<br>(Intensity)   | Peak8<br>(Intensity)    | Peak9<br>(Intensity)    |
| y0              | -4.44097 ± 0                                              | -4.44097 ± 0            | -4.44097 ± 0            | -4.44097 ± 0            | -4.44097 ± 0           | -4.44097 ± 0            | -4.44097 ± 0           | -4.44097 ± 0            | -4.44097 ± 0            |
| x <sub>c</sub>  | 139.15724 ± 0.90544                                       | 158.91662 ± 2.81645     | 177.1049 ± 2.90142      | 196.42286 ± 2.17249     | 214.13305 ± 1.60011    | 231.46774 ± 3.31386     | 320.64152 ± 0.7151     | 359.3776 ± 0.37556      | 409.05642 ± 5.43423     |
| w               | 8.60228 ± 3.67073                                         | 22.2198 ± 10.32624      | 25.34188 ± 19.65025     | 26.46136 ± 14.98734     | 26.06282 ± 11.53014    | 28.46782 ± 5.6696       | 6.64635 ± 2.09214      | 16.97664 ± 1.32747      | 36.21366 ± 11.68757     |
| A               | 527.58229 ± 247.45669                                     | 2255.72602 ± 2015.93803 | 3256.78141 ± 4789.08222 | 6107.99196 ± 7068.68423 | 7608.7661 ± 6882.84616 | 4510.52803 ± 2976.28977 | 406.14257 ± 93.09556   | 3264.46689 ± 229.17489  | 2488.03969 ± 1290.98208 |
| Plot            | Peak10<br>(Intensity)                                     | Peak11<br>(Intensity)   | Peak12<br>(Intensity)   | Peak13<br>(Intensity)   | Peak14<br>(Intensity)  | Peak15<br>(Intensity)   | Peak16<br>(Intensity)  | Peak17<br>(Intensity)   | Peak18<br>(Intensity)   |
| y0              | -4.44097 ± 0                                              | -4.44097 ± 0            | -4.44097 ± 0            | -4.44097 ± 0            | -4.44097 ± 0           | -4.44097 ± 0            | -4.44097 ± 0           | -4.44097 ± 0            | -4.44097 ± 0            |
| x <sub>c</sub>  | 428.4111 ± 0.8661                                         | 486.15513 ± 1.9471      | 540.01788 ± 1.07145     | 577.22867 ± 1.84535     | 806.94212 ± 1.78146    | 837.74219 ± 0.59947     | 883.72142 ± 0.1339     | 930.68305 ± 0.15613     | 952.48018 ± 0.023       |
| w               | 19.41697 ± 3.4323                                         | 24.13489 ± 6.98988      | 39.66517 ± 4.3096       | 23.16324 ± 6.63377      | 22.18385 ± 5.70891     | 16.93034 ± 2.04008      | 13.45162 ± 0.42118     | 24.2968 ± 0.52192       | 9.94097 ± 0.08308       |
| A               | 3107.72645 ± 966.70883                                    | 1087.94847 ± 284.95744  | 5388.10773 ± 573.04775  | 1192.41035 ± 370.76612  | 1054.46895 ± 224.33489 | 2017.28714 ± 206.16161  | 6003.48827 ± 144.06866 | 15817.25927 ± 297.76528 | 23311.11321 ± 188.10954 |
| Reduced Chi-Sqr | 167.97357                                                 |                         |                         |                         |                        |                         |                        |                         |                         |
| R-Square (COD)  | 0.99459                                                   |                         |                         |                         |                        |                         |                        |                         |                         |
| Adj. R-Square   | 0.99424                                                   |                         |                         |                         |                        |                         |                        |                         |                         |

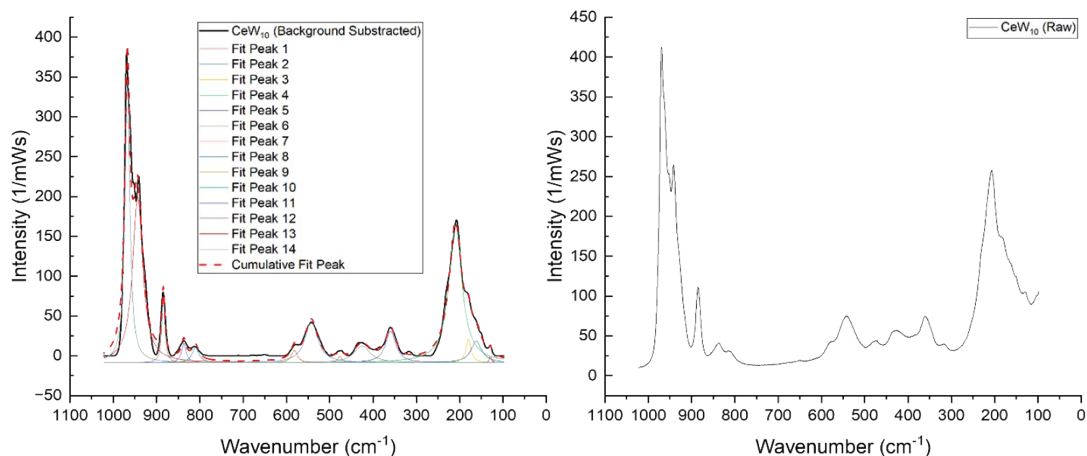

**Figure S27. (Left)** Background subtracted Raman spectrum of complex **2** (CeW<sub>10</sub>) fit to Lorentzian functions. **(Right)** Raw Raman spectrum for complex **2**.

**Table S19.** Peak fitting parameters for Raman spectrum of complex **2**.

| Model           | Lorentz                                                   |                           |                          |                           |                           |                           |                           |
|-----------------|-----------------------------------------------------------|---------------------------|--------------------------|---------------------------|---------------------------|---------------------------|---------------------------|
| Equation        | $y = y_0 + (2 * A / \pi) * (w / (4 * (x - x_c)^2 + w^2))$ |                           |                          |                           |                           |                           |                           |
| Plot            | Peak1<br>(Intensity)                                      | Peak2<br>(Intensity)      | Peak3<br>(Intensity)     | Peak4<br>(Intensity)      | Peak5<br>(Intensity)      | Peak6<br>(Intensity)      | Peak7<br>(Intensity)      |
| y0              | -8.55346 ±<br>0.6172                                      | -8.55346 ±<br>0.6172      | -8.55346 ±<br>0.6172     | -8.55346 ±<br>0.6172      | -8.55346 ±<br>0.6172      | -8.55346 ±<br>0.6172      | -8.55346 ±<br>0.6172      |
| x <sub>c</sub>  | 128.72767 ±<br>2.16135                                    | 161.347 ±<br>3.76867      | 179.60768 ±<br>1.40311   | 209.56164 ±<br>0.36787    | 359.19543 ±<br>1.05638    | 425.13805 ±<br>2.61231    | 476.52888 ±<br>3.53264    |
| w               | 5.43205 ±<br>7.14445                                      | 29.71914 ±<br>10.10783    | 14.00117 ±<br>6.15885    | 35.79716 ±<br>1.12508     | 28.24098 ±<br>3.49421     | 44.54835 ±<br>9.91003     | 12.65236 ±<br>11.42054    |
| A               | 71.22089 ±<br>77.45904                                    | 1262.34581 ±<br>529.52242 | 644.77781 ±<br>387.32842 | 9711.06075 ±<br>291.85097 | 1752.05296 ±<br>181.09798 | 1467.27418 ±<br>269.11653 | 151.39527 ±<br>110.77511  |
| Plot            | Peak8<br>(Intensity)                                      | Peak9<br>(Intensity)      | Peak10<br>(Intensity)    | Peak11<br>(Intensity)     | Peak12<br>(Intensity)     | Peak13<br>(Intensity)     | Peak14<br>(Intensity)     |
| y0              | -8.55346 ±<br>0.6172                                      | -8.55346 ±<br>0.6172      | -8.55346 ±<br>0.6172     | -8.55346 ±<br>0.6172      | -8.55346 ±<br>0.6172      | -8.55346 ±<br>0.6172      | -8.55346 ±<br>0.6172      |
| x <sub>c</sub>  | 542.55195 ±<br>0.86989                                    | 581.78554 ±<br>1.99147    | 810.49072 ±<br>1.71269   | 837.12121 ±<br>1.09978    | 884.57275 ±<br>0.25193    | 943.77607 ±<br>0.26422    | 967.55739 ±<br>0.08724    |
| w               | 34.09285 ± 0                                              | 16.32541 ± 0              | 18.82615 ± 0             | 12.7444 ± 0               | 8.08721 ±<br>0.74639      | 28.04757 ±<br>0.81359     | 13.53983 ±<br>0.3172      |
| A               | 2806.57498 ±<br>111.64957                                 | 392.8631 ±<br>74.21776    | 560.56509 ±<br>77.927    | 479.72222 ±<br>62.71792   | 1034.93814 ±<br>70.65604  | 9174.91526 ±<br>257.73164 | 7327.26229 ±<br>179.07014 |
| Reduced Chi-Sqr | 83.1653                                                   |                           |                          |                           |                           |                           |                           |
| R-Square (COD)  | 0.97781                                                   |                           |                          |                           |                           |                           |                           |
| Adj. R-Square   | 0.97682                                                   |                           |                          |                           |                           |                           |                           |

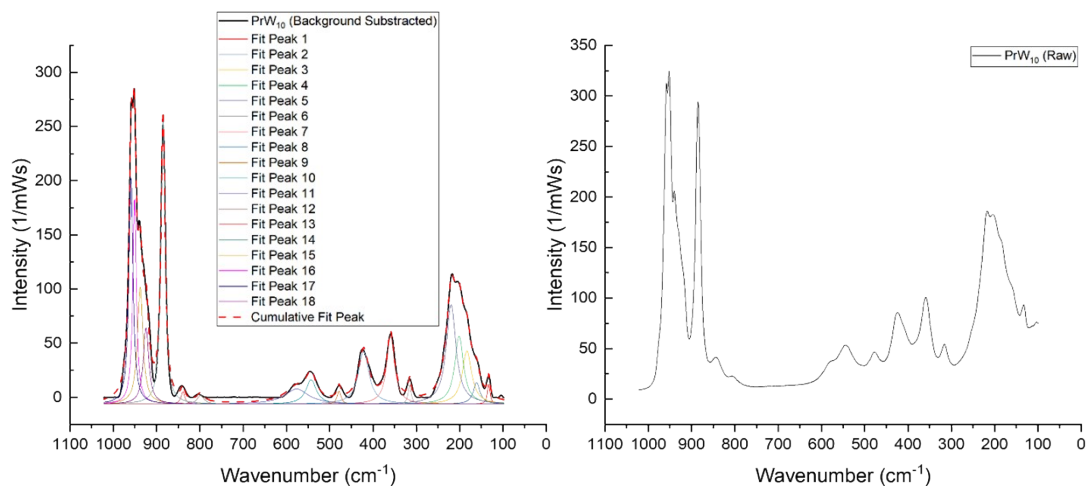

**Figure S28.** (Left) Background subtracted Raman spectrum of complex **3** ( $\text{PrW}_{10}$ ) fit to Lorentzian functions. (Right) Raw Raman spectrum for complex **3**.

**Table S20.** Peak fitting parameters for Raman spectrum of complex **3**.

| Model           | Lorentz                                                              |                        |                       |                         |                        |                        |                       |                        |                        |
|-----------------|----------------------------------------------------------------------|------------------------|-----------------------|-------------------------|------------------------|------------------------|-----------------------|------------------------|------------------------|
| Equation        | $y = y_0 + (2 \cdot A / \pi) \cdot (w / (4 \cdot (x - xc)^2 + w^2))$ |                        |                       |                         |                        |                        |                       |                        |                        |
| Plot            | Peak1<br>(Intensity)                                                 | Peak2<br>(Intensity)   | Peak3<br>(Intensity)  | Peak4<br>(Intensity)    | Peak5<br>(Intensity)   | Peak6<br>(Intensity)   | Peak7<br>(Intensity)  | Peak8<br>(Intensity)   | Peak9<br>(Intensity)   |
| $y_0$           | -6.13315 ± 0.30949                                                   | -6.13315 ± 0.30949     | -6.13315 ± 0.30949    | -6.13315 ± 0.30949      | -6.13315 ± 0.30949     | -6.13315 ± 0.30949     | -6.13315 ± 0.30949    | -6.13315 ± 0.30949     | -6.13315 ± 0.30949     |
| $xc$            | 132.65658 ± 0.5081                                                   | 160.57111 ± 1.31367    | 183.02827 ± 1.54241   | 201.06143 ± 0.96284     | 219.54585 ± 0.74281    | 315.31067 ± 0.55977    | 359.33723 ± 0.25536   | 421.64325 ± 0.38188    | 478.51372 ± 0.92153    |
| $w$             | 7.19654 ± 1.59907                                                    | 18.59429 ± 4.948       | 25.88199 ± 6.55112    | 24.25583 ± 6.41885      | 26.7591 ± 1.44909      | 8.43506 ± 1.66657      | 21.63972 ± 0.81648    | 29.20224 ± 1.24331     | 10.84667 ± 2.78179     |
| $A$             | 207.7142 ± 36.40934                                                  | 575.75034 ± 233.09212  | 1996.3406 ± 912.45055 | 2387.02292 ± 1142.85807 | 3863.13013 ± 522.73052 | 233.48396 ± 34.21467   | 2121.10266 ± 61.85019 | 2221.18544 ± 73.8408   | 204.11032 ± 39.26909   |
| Plot            | Peak10<br>(Intensity)                                                | Peak11<br>(Intensity)  | Peak12<br>(Intensity) | Peak13<br>(Intensity)   | Peak14<br>(Intensity)  | Peak15<br>(Intensity)  | Peak16<br>(Intensity) | Peak17<br>(Intensity)  | Peak18<br>(Intensity)  |
| $y_0$           | -6.13315 ± 0.30949                                                   | -6.13315 ± 0.30949     | -6.13315 ± 0.30949    | -6.13315 ± 0.30949      | -6.13315 ± 0.30949     | -6.13315 ± 0.30949     | -6.13315 ± 0.30949    | -6.13315 ± 0.30949     | -6.13315 ± 0.30949     |
| $xc$            | 543.15903 ± 1.08326                                                  | 576.27918 ± 4.13816    | 798.42671 ± 1.82479   | 839.38277 ± 0.90287     | 885.0843 ± 0.04099     | 937.87606 ± 0.2367     | 951.08579 ± 0.12143   | 959.20744 ± 0.14161    | 924.53192 ± 0.40584    |
| $w$             | 28.47215 ± 4.03939                                                   | 65.54114 ± 0           | 19.18812 ± 0          | 10.12777 ± 2.69725      | 11.07876 ± 0.1255      | 14.9474 ± 1.3701       | 9.94549 ± 0.59544     | 11.18136 ± 0.29712     | 15.31284 ± 1.08122     |
| $A$             | 1009.49661 ± 183.97148                                               | 1430.81422 ± 180.54781 | 236.69367 ± 35.0556   | 181.66716 ± 35.94961    | 4578.59697 ± 39.29689  | 2535.40016 ± 316.45758 | 2967.1853 ± 270.01727 | 3664.28302 ± 181.71676 | 1689.50647 ± 196.73666 |
| Reduced Chi-Sqr | 16.59829                                                             |                        |                       |                         |                        |                        |                       |                        |                        |
| R-Square (COD)  | 0.99403                                                              |                        |                       |                         |                        |                        |                       |                        |                        |
| Adj. R-Square   | 0.99366                                                              |                        |                       |                         |                        |                        |                       |                        |                        |

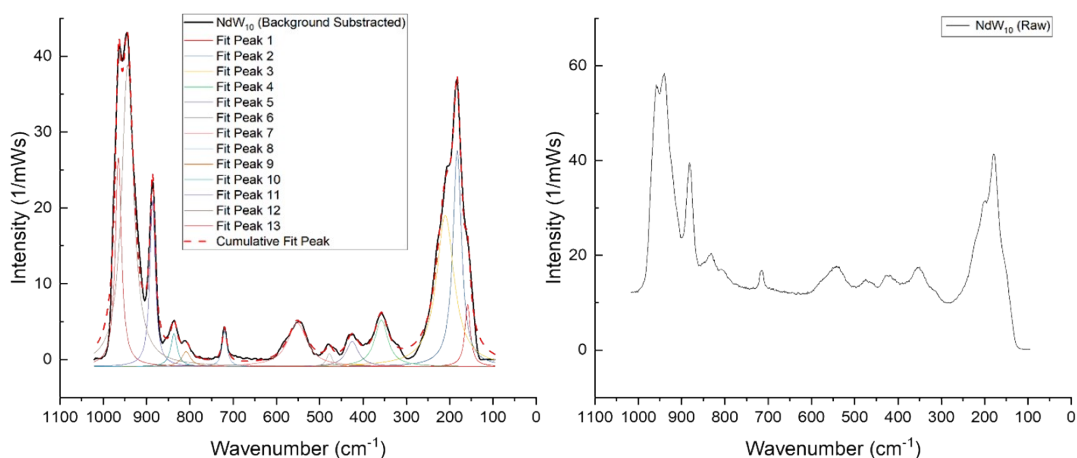

**Figure S29. (Left)** Background subtracted Raman spectrum of complex **4** ( $\text{NdW}_{10}$ ) fit to Lorentzian functions. **(Right)** Raw Raman spectrum for complex **4**.

**Table S21.** Peak fitting parameters for Raman spectrum of complex **4**.

| Model           | Lorentz                                                   |                         |                          |                        |                          |                         |                         |
|-----------------|-----------------------------------------------------------|-------------------------|--------------------------|------------------------|--------------------------|-------------------------|-------------------------|
| Equation        | $y = y_0 + (2 * A / \pi) * (w / (4 * (x - x_c)^2 + w^2))$ |                         |                          |                        |                          |                         |                         |
| Plot            | Peak1<br>(Intensity)                                      | Peak2<br>(Intensity)    | Peak3<br>(Intensity)     | Peak4<br>(Intensity)   | Peak5<br>(Intensity)     | Peak6<br>(Intensity)    | Peak7<br>(Intensity)    |
| y0              | -0.91247 ±<br>0.042                                       | -0.91247 ±<br>0.042     | -0.91247 ±<br>0.042      | -0.91247 ±<br>0.042    | -0.91247 ±<br>0.042      | -0.91247 ±<br>0.042     | -0.91247 ±<br>0.042     |
| x <sub>c</sub>  | 158.22159 ±<br>0.13764                                    | 182.32357 ±<br>0.06481  | 209.91086 ±<br>0.23978   | 357.77593 ±<br>0.27189 | 424.98358 ±<br>0.63326   | 477.83019 ±<br>0.62728  | 551.8646 ±<br>0.4143    |
| w               | 15.19911 ±<br>0.4665                                      | 23.87127 ±<br>0.32844   | 49.24361 ±<br>0.5203     | 36.7959 ±<br>0.96932   | 34.24839 ±<br>2.10125    | 15.95868 ±<br>2.00263   | 52.90546 ±<br>1.46803   |
| A               | 195.32326 ±<br>6.67199                                    | 1068.1673 ±<br>20.69703 | 1541.83531 ±<br>24.83975 | 353.51301 ±<br>8.33341 | 176.72614 ±<br>9.98382   | 42.45262 ±<br>4.66086   | 475.32889 ±<br>12.30822 |
| Plot            | Peak8<br>(Intensity)                                      | Peak9<br>(Intensity)    | Peak10<br>(Intensity)    | Peak11<br>(Intensity)  | Peak12<br>(Intensity)    | Peak13<br>(Intensity)   |                         |
| y0              | -0.91247 ±<br>0.042                                       | -0.91247 ±<br>0.042     | -0.91247 ±<br>0.042      | -0.91247 ±<br>0.042    | -0.91247 ±<br>0.042      | -0.91247 ±<br>0.042     |                         |
| x <sub>c</sub>  | 719.91293 ±<br>0.17402                                    | 808.83191 ±<br>0.75853  | 836.79723 ±<br>0.25663   | 886.34283 ±<br>0.04137 | 943.88869 ±<br>0.07773   | 965.20651 ±<br>0.04992  |                         |
| w               | 13.17334 ±<br>0.55452                                     | 24.72573 ±<br>2.76829   | 17.60192 ±<br>0.86959    | 14.75484 ±<br>0.12728  | 33.06819 ±<br>0.19211    | 17.00212 ±<br>0.1828    |                         |
| A               | 96.82962 ±<br>3.32828                                     | 75.84663 ±<br>8.00664   | 119.85697 ±<br>5.88933   | 507.24263 ±<br>3.69056 | 2066.36838 ±<br>15.45656 | 735.85251 ±<br>11.04901 |                         |
| Reduced Chi-Sqr | 0.12505                                                   |                         |                          |                        |                          |                         |                         |
| R-Square (COD)  | 0.99902                                                   |                         |                          |                        |                          |                         |                         |
| Adj. R-Square   | 0.99899                                                   |                         |                          |                        |                          |                         |                         |



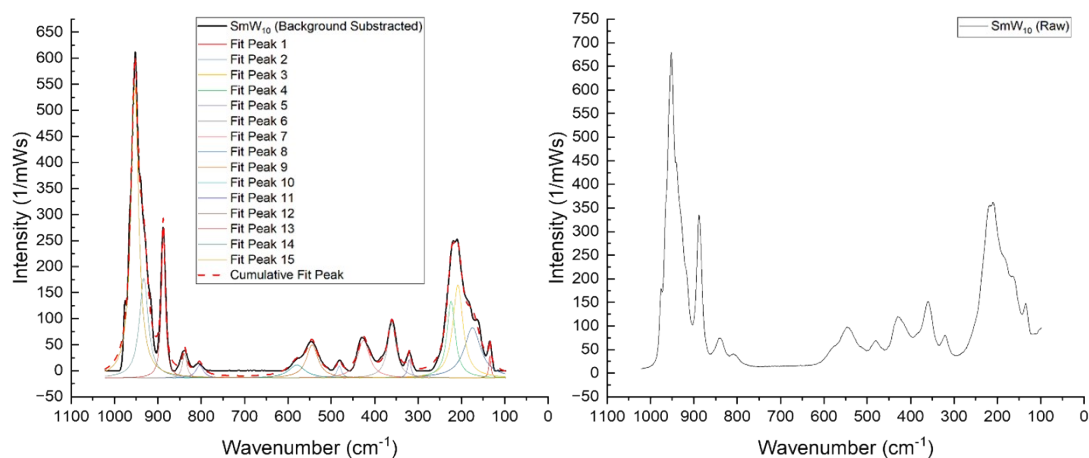

**Figure S30. (Left)** Background subtracted Raman spectrum of complex **5** ( $\text{SmW}_{10}$ ) fit to Lorentzian functions. **(Right)** Raw Raman spectrum for complex **5**.

**Table S22.** Peak fitting parameters for Raman spectrum of complex **5**.

| Model           | Lorentz                                                   |                            |                            |                            |                          |                           |                           |                          |
|-----------------|-----------------------------------------------------------|----------------------------|----------------------------|----------------------------|--------------------------|---------------------------|---------------------------|--------------------------|
| Equation        | $y = y_0 + (2^* A / \pi) * (w / (4 * (x - x_c)^2 + w^2))$ |                            |                            |                            |                          |                           |                           |                          |
| Plot            | Peak1<br>(Intensity)                                      | Peak2<br>(Intensity)       | Peak3<br>(Intensity)       | Peak4<br>(Intensity)       | Peak5<br>(Intensity)     | Peak6<br>(Intensity)      | Peak7<br>(Intensity)      | Peak8<br>(Intensity)     |
| $y_0$           | -13.79663 ±<br>0.76681                                    | -13.79663 ±<br>0.76681     | -13.79663 ±<br>0.76681     | -13.79663 ±<br>0.76681     | -13.79663 ±<br>0.76681   | -13.79663 ±<br>0.76681    | -13.79663 ±<br>0.76681    | -13.79663 ±<br>0.76681   |
| $x_c$           | 134.00419 ±<br>0.49918                                    | 174.25849 ±<br>1.70217     | 207.90455 ±<br>1.30403     | 223.62324 ±<br>1.09715     | 320.02186 ±<br>0.7642    | 360.44298 ±<br>0.42154    | 425.59196 ±<br>0.69825    | 481.52103 ±<br>1.341     |
| $w$             | 5.72887 ±<br>1.67707                                      | 45.76764 ±<br>4.5009       | 28.02555 ±<br>4.42401      | 22.73975 ±<br>2.67608      | 9.49252 ±<br>2.32467     | 23.83083 ±<br>1.39163     | 32.1992 ±<br>2.33333      | 12.55676 ±<br>4.0963     |
| $A$             | 383.05717 ±<br>94.07888                                   | 6941.65437 ±<br>1040.21171 | 7868.66869 ±<br>2328.63241 | 5266.44999 ±<br>1591.79972 | 526.41124 ±<br>97.47249  | 3858.58163 ±<br>176.02167 | 3647.86028 ±<br>207.98227 | 449.97155 ±<br>111.26042 |
| Plot            | Peak9<br>(Intensity)                                      | Peak10<br>(Intensity)      | Peak11<br>(Intensity)      | Peak12<br>(Intensity)      | Peak13<br>(Intensity)    | Peak14<br>(Intensity)     | Peak15<br>(Intensity)     |                          |
| $y_0$           | -13.79663 ±<br>0.76681                                    | -13.79663 ±<br>0.76681     | -13.79663 ±<br>0.76681     | -13.79663 ±<br>0.76681     | -13.79663 ±<br>0.76681   | -13.79663 ±<br>0.76681    | -13.79663 ±<br>0.76681    |                          |
| $x_c$           | 544.2887 ±<br>0.91513                                     | 579.45719 ±<br>2.95947     | 804.05604 ±<br>1.58428     | 838.51521 ±<br>0.60545     | 887.58566 ±<br>0.09511   | 932.54182 ±<br>0.39862    | 953.32337 ±<br>0.11197    |                          |
| $w$             | 31.98048 ± 0                                              | 44.52225 ± 0               | 20.72059 ± 0               | 11.72595 ± 0               | 10.11706 ±<br>0.29396    | 24.47152 ±<br>1.15604     | 20.82246 ±<br>0.33509     |                          |
| $A$             | 3194.81318 ±<br>167.13228                                 | 1754.23858 ±<br>192.98359  | 789.20564 ±<br>94.13166    | 871.56642 ±<br>67.54177    | 4427.03706 ±<br>99.05513 | 7364.16196 ±<br>434.1419  | 18463.3915 ±<br>395.14759 |                          |
| Reduced Chi-Sqr | 109.80477                                                 |                            |                            |                            |                          |                           |                           |                          |
| R-Square (COD)  | 0.98916                                                   |                            |                            |                            |                          |                           |                           |                          |
| Adj. R-Square   | 0.98863                                                   |                            |                            |                            |                          |                           |                           |                          |

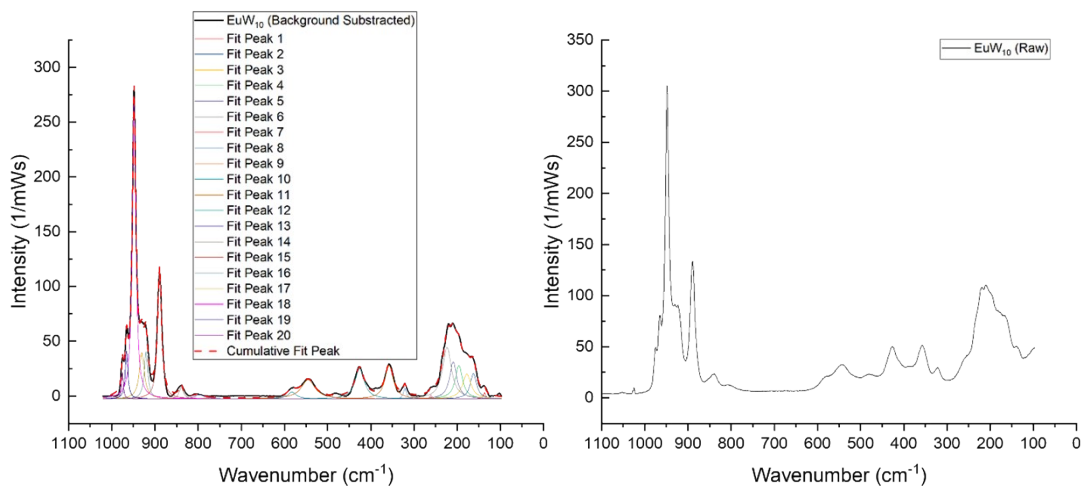

**Figure S31. (Left)** Background subtracted Raman spectrum of complex **6** ( $\text{EuW}_{10}$ ) fit to Lorentzian functions. **(Right)** Raw Raman spectrum for complex **6**.

**Table S23.** Peak fitting parameters for Raman spectrum of complex **6**.

| Model           | Lorentz                                         |                       |                       |                       |                        |                        |                       |                       |                       |                       |
|-----------------|-------------------------------------------------|-----------------------|-----------------------|-----------------------|------------------------|------------------------|-----------------------|-----------------------|-----------------------|-----------------------|
| Equation        | $y = y_0 + (2*A/\pi) * (w/(4*(x-x_c)^2 + w^2))$ |                       |                       |                       |                        |                        |                       |                       |                       |                       |
| Plot            | Peak1<br>(Intensity)                            | Peak2<br>(Intensity)  | Peak3<br>(Intensity)  | Peak4<br>(Intensity)  | Peak5<br>(Intensity)   | Peak6<br>(Intensity)   | Peak7<br>(Intensity)  | Peak8<br>(Intensity)  | Peak9<br>(Intensity)  | Peak10<br>(Intensity) |
| y0              | -2.52683 ± 0.14072                              | -2.52683 ± 0.14072    | -2.52683 ± 0.14072    | -2.52683 ± 0.14072    | -2.52683 ± 0.14072     | -2.52683 ± 0.14072     | -2.52683 ± 0.14072    | -2.52683 ± 0.14072    | -2.52683 ± 0.14072    | -2.52683 ± 0.14072    |
| x <sub>c</sub>  | 136.61183 ± 0.73754                             | 162.31996 ± 0.84784   | 177.51798 ± 1.22385   | 195.86656 ± 1.3314    | 209.11304 ± 1.05015    | 223.3791 ± 0.92806     | 260.84929 ± 1.14289   | 321.12088 ± 0.47215   | 357.63562 ± 0.2526    | 425.79264 ± 0.28609   |
| w               | 6.65705 ± 2.39836                               | 17.40553 ± 2.816      | 23.19336 ± 8.53615    | 20.41627 ± 7.08987    | 19.82037 ± 6.83001     | 24.40104 ± 1.49028     | 5.53803 ± 3.54357     | 8.15313 ± 1.4342      | 22.7188 ± 0.81487     | 25.22724 ± 0.88991    |
| A               | 59.29344 ± 17.63172                             | 636.2522 ± 221.91115  | 826.53119 ± 514.5439  | 973.80657 ± 694.24993 | 1052.37696 ± 736.93689 | 1805.88285 ± 338.30652 | 28.44883 ± 14.11466   | 122.53544 ± 16.28791  | 1078.64992 ± 29.65796 | 1093.95059 ± 29.79114 |
| Plot            | Peak11<br>(Intensity)                           | Peak12<br>(Intensity) | Peak13<br>(Intensity) | Peak14<br>(Intensity) | Peak15<br>(Intensity)  | Peak16<br>(Intensity)  | Peak17<br>(Intensity) | Peak18<br>(Intensity) | Peak19<br>(Intensity) | Peak20<br>(Intensity) |
| y0              | -2.52683 ± 0.14072                              | -2.52683 ± 0.14072    | -2.52683 ± 0.14072    | -2.52683 ± 0.14072    | -2.52683 ± 0.14072     | -2.52683 ± 0.14072     | -2.52683 ± 0.14072    | -2.52683 ± 0.14072    | -2.52683 ± 0.14072    | -2.52683 ± 0.14072    |
| x <sub>c</sub>  | 545.43993 ± 0.63987                             | 582.73841 ± 1.30487   | 796.72954 ± 2.33203   | 839.34071 ± 0.49237   | 889.30137 ± 0.04237    | 920.90189 ± 0.21728    | 930.64708 ± 0.34947   | 948.42238 ± 0.01944   | 965.86079 ± 0.10423   | 975.62603 ± 0.14437   |
| w               | 38.02573 ± 2.15506                              | 23.23998 ± 0          | 27.37242 ± 0          | 11.68462 ± 1.49179    | 10.68922 ± 0.12942     | 9.99667 ± 0.69475      | 14.10453 ± 1.1652     | 9.61491 ± 0.07637     | 7.40089 ± 0.38068     | 4.93255 ± 0.47973     |
| A               | 1034.5242 ± 50.67772                            | 228.61892 ± 24.40241  | 149.07574 ± 20.19175  | 192.32128 ± 18.41828  | 1951.57874 ± 17.89472  | 674.40618 ± 77.81334   | 933.46296 ± 105.47454 | 4156.04801 ± 33.401   | 504.553 ± 22.24967    | 188.79426 ± 15.85178  |
| Reduced Chi-Sqr | 3.58779                                         |                       |                       |                       |                        |                        |                       |                       |                       |                       |
| R-Square (COD)  | 0.99665                                         |                       |                       |                       |                        |                        |                       |                       |                       |                       |
| Adj. R-Square   | 0.99642                                         |                       |                       |                       |                        |                        |                       |                       |                       |                       |

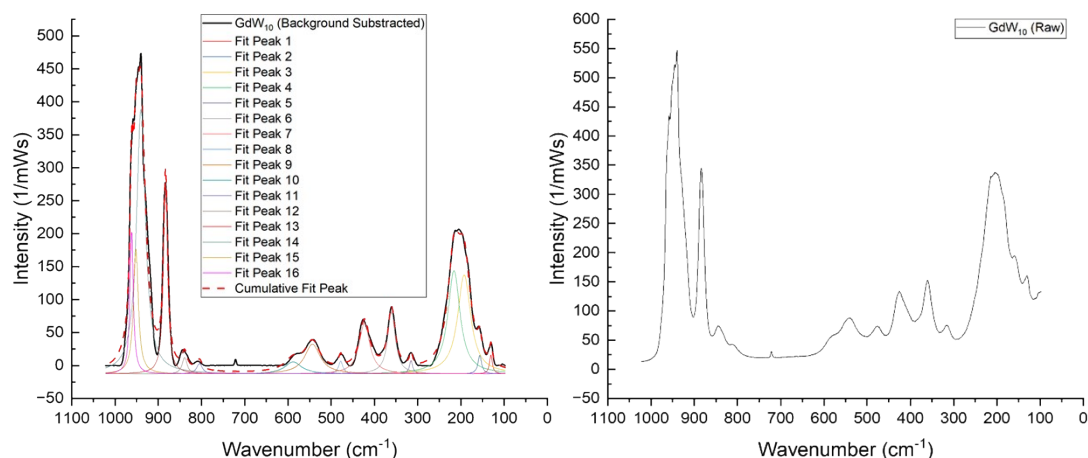

**Figure S32. (Left)** Background subtracted Raman spectrum of complex 7 ( $GdW_{10}$ ) fit to Lorentzian functions. **(Right)** Raw Raman spectrum for complex 7.

**Table S24.** Peak fitting parameters for Raman spectrum of complex 7.

| Model              | Lorentz                                       |                          |                            |                           |                           |                             |                            |                           |
|--------------------|-----------------------------------------------|--------------------------|----------------------------|---------------------------|---------------------------|-----------------------------|----------------------------|---------------------------|
| Equation           | $y = y_0 + (2^*A/pi)*(w/(4*(x-x_0)^2 + w^2))$ |                          |                            |                           |                           |                             |                            |                           |
| Plot               | Peak1<br>(Intensity)                          | Peak2<br>(Intensity)     | Peak3<br>(Intensity)       | Peak4<br>(Intensity)      | Peak5<br>(Intensity)      | Peak6<br>(Intensity)        | Peak7<br>(Intensity)       | Peak8<br>(Intensity)      |
| y0                 | -12.62297 ±<br>0.86491                        | -12.62297 ±<br>0.86491   | -12.62297 ±<br>0.86491     | -12.62297 ±<br>0.86491    | -12.62297 ±<br>0.86491    | -12.62297 ±<br>0.86491      | -12.62297 ±<br>0.86491     | -12.62297 ±<br>0.86491    |
| x0                 | 130.45262 ±<br>0.88895                        | 156.26011 ±<br>1.0588    | 192.30316 ±<br>1.26284     | 215.90714 ±<br>1.05595    | 315.3342 ±<br>1.31249     | 360.49808 ±<br>0.43674      | 423.10466 ±<br>0.64309     | 478.04667 ±<br>1.59749    |
| w                  | 7.88471 ±<br>2.71149                          | 10.07125 ±<br>3.92622    | 36.39697 ±<br>3.50848      | 33.84296 ±<br>2.35806     | 8.93426 ±<br>3.909        | 20.71288 ±<br>1.38839       | 29.79798 ±<br>2.11351      | 12.05742 ±<br>4.99748     |
| A                  | 355.88525 ±<br>93.60914                       | 442.85319 ±<br>163.21948 | 8586.33284 ±<br>1419.36031 | 8322.08126 ±<br>1257.5369 | 285.36207 ±<br>92.64009   | 3047.88769 ±<br>157.8477    | 3581.7536 ±<br>198.548     | 364.35498 ±<br>117.08066  |
| Plot               | Peak9<br>(Intensity)                          | Peak10<br>(Intensity)    | Peak11<br>(Intensity)      | Peak12<br>(Intensity)     | Peak13<br>(Intensity)     | Peak14<br>(Intensity)       | Peak15<br>(Intensity)      | Peak16<br>(Intensity)     |
| y0                 | -12.62297 ±<br>0.86491                        | -12.62297 ±<br>0.86491   | -12.62297 ±<br>0.86491     | -12.62297 ±<br>0.86491    | -12.62297 ±<br>0.86491    | -12.62297 ±<br>0.86491      | -12.62297 ±<br>0.86491     | -12.62297 ±<br>0.86491    |
| x0                 | 543.47435 ±<br>1.66882                        | 587.92677 ±<br>4.40144   | 804.77165 ±<br>2.20429     | 839.18297 ±<br>1.25963    | 883.30679 ±<br>0.0976     | 940.16952 ±<br>0.49338      | 951.91484 ±<br>0.3877      | 961.7652 ±<br>0.22629     |
| w                  | 42.94573 ±<br>5.85775                         | 46.34339 ±<br>0          | 15.78434 ±<br>0            | 13.37497 ±<br>3.8811      | 11.06548 ±<br>0.29888     | 24.61605 ±<br>0.6441        | 13.41294 ±<br>2.56009      | 9.07133 ±<br>0.74558      |
| A                  | 3039.71476 ±<br>403.26916                     | 1318.00234 ±<br>258.619  | 386.92806 ±<br>83.44296    | 521.86639 ±<br>114.14627  | 5041.44633 ±<br>103.43263 | 15520.63048 ±<br>1060.18016 | 3993.26545 ±<br>1248.21143 | 3087.43205 ±<br>423.12238 |
| Reduced<br>Chi-Sqr | 114.72288                                     |                          |                            |                           |                           |                             |                            |                           |
| R-Square<br>(COD)  | 0.98642                                       |                          |                            |                           |                           |                             |                            |                           |
| Adj. R-<br>Square  | 0.98568                                       |                          |                            |                           |                           |                             |                            |                           |

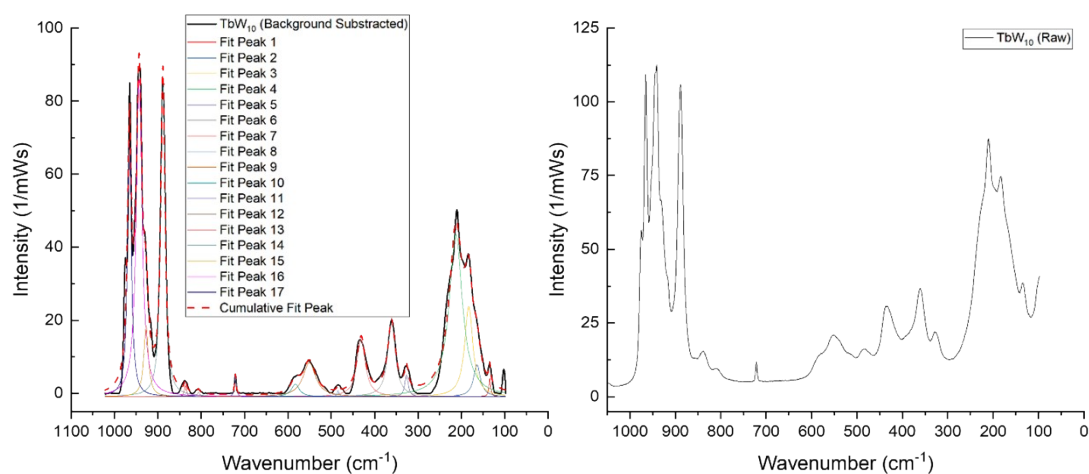

**Figure S33. (Left)** Background subtracted Raman spectrum of complex **8** (TbW<sub>10</sub>) fit to Lorentzian functions. **(Right)** Raw Raman spectrum for complex **8**.

**Table S25.** Peak fitting parameters for Raman spectrum of complex **8**.

| Model           | Lorentz                                                  |                       |                       |                        |                       |                       |                       |                       |                      |
|-----------------|----------------------------------------------------------|-----------------------|-----------------------|------------------------|-----------------------|-----------------------|-----------------------|-----------------------|----------------------|
| Equation        | $y = y_0 + (2 * A / \pi) * (w / (4 * (x - xc)^2 + w^2))$ |                       |                       |                        |                       |                       |                       |                       |                      |
| Plot            | Peak1<br>(Intensity)                                     | Peak2<br>(Intensity)  | Peak3<br>(Intensity)  | Peak4<br>(Intensity)   | Peak5<br>(Intensity)  | Peak6<br>(Intensity)  | Peak7<br>(Intensity)  | Peak8<br>(Intensity)  | Peak9<br>(Intensity) |
| y0              | -0.94331 ± 0                                             | -0.94331 ± 0          | -0.94331 ± 0          | -0.94331 ± 0           | -0.94331 ± 0          | -0.94331 ± 0          | -0.94331 ± 0          | -0.94331 ± 0          | -0.94331 ± 0         |
| xc              | 134.36866 ± 0.85004                                      | 163.86361 ± 1.80798   | 182.88278 ± 0.736     | 212.61083 ± 0.51382    | 326.5303 ± 0.99399    | 361.00161 ± 0.45447   | 431.31034 ± 0.59557   | 484.55942 ± 2.62685   | 550.81478 ± 1.74414  |
| w               | 4.88353 ± 2.57163                                        | 18.84902 ± 5.64137    | 22.7707 ± 3.53204     | 36.38905 ± 1.26325     | 9.21112 ± 3.03028     | 21.09244 ± 1.43682    | 23.3402 ± 1.79274     | 5.65293 ± 7.65649     | 34.52318 ± 5.27793   |
| A               | 39.26389 ± 15.54266                                      | 258.26664 ± 112.04602 | 883.11427 ± 182.2413  | 2537.60648 ± 113.91388 | 85.96864 ± 21.33573   | 659.8311 ± 33.33057   | 572.66574 ± 31.92864  | 15.32858 ± 15.07313   | 505.36019 ± 77.60135 |
| Plot            | Peak10<br>(Intensity)                                    | Peak11<br>(Intensity) | Peak12<br>(Intensity) | Peak13<br>(Intensity)  | Peak14<br>(Intensity) | Peak15<br>(Intensity) | Peak16<br>(Intensity) | Peak17<br>(Intensity) |                      |
| y0              | -0.94331 ± 0                                             | -0.94331 ± 0          | -0.94331 ± 0          | -0.94331 ± 0           | -0.94331 ± 0          | -0.94331 ± 0          | -0.94331 ± 0          | -0.94331 ± 0          |                      |
| xc              | 582.97816 ± 3.26201                                      | 721.44674 ± 0.70735   | 806.43705 ± 4.22005   | 836.82412 ± 1.49766    | 888.53059 ± 0.07102   | 927.30868 ± 0.44799   | 943.34038 ± 0.12077   | 965.72414 ± 0.0905    |                      |
| w               | 22.58543 ± 11.19487                                      | 4.70112 ± 2.00436     | 7.54766 ± 12.07794    | 5.76545 ± 4.29342      | 11.45973 ± 0.20905    | 12.53741 ± 1.51151    | 15.96491 ± 0.48443    | 10.49092 ± 0.30388    |                      |
| A               | 120.7757 ± 64.34171                                      | 42.22655 ± 12.73218   | 14.3005 ± 16.24657    | 26.82281 ± 14.21857    | 1582.40483 ± 20.85967 | 382.20437 ± 51.76799  | 2177.88523 ± 68.42718 | 1145.45459 ± 29.19604 |                      |
| Reduced Chi-Sqr | 5.40776                                                  |                       |                       |                        |                       |                       |                       |                       |                      |
| R-Square (COD)  | 0.98372                                                  |                       |                       |                        |                       |                       |                       |                       |                      |
| Adj. R-Square   | 0.98275                                                  |                       |                       |                        |                       |                       |                       |                       |                      |

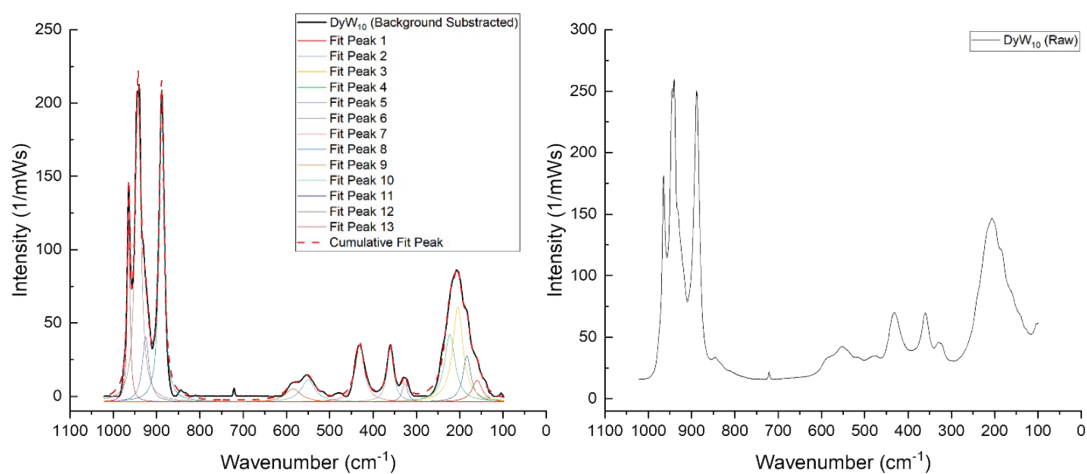

**Figure S34.** (Left) Background subtracted Raman spectrum of complex **9** ( $\text{DyW}_{10}$ ) fit to Lorentzian functions. (Right) Raw Raman spectrum for complex **9**.

**Table S26.** Peak fitting parameters for Raman spectrum of complex **9**.

| Model              | Lorentz                                      |                           |                            |                           |                           |                          |                          |
|--------------------|----------------------------------------------|---------------------------|----------------------------|---------------------------|---------------------------|--------------------------|--------------------------|
| Equation           | $y = y_0 + (2^*A/pi)*(w/(4*(x-xc)^2 + w^2))$ |                           |                            |                           |                           |                          |                          |
| Plot               | Peak1<br>(Intensity)                         | Peak2<br>(Intensity)      | Peak3<br>(Intensity)       | Peak4<br>(Intensity)      | Peak5<br>(Intensity)      | Peak6<br>(Intensity)     | Peak7<br>(Intensity)     |
| y0                 | -3.8213 ±<br>0.20131                         | -3.8213 ±<br>0.20131      | -3.8213 ±<br>0.20131       | -3.8213 ±<br>0.20131      | -3.8213 ±<br>0.20131      | -3.8213 ±<br>0.20131     | -3.8213 ±<br>0.20131     |
| xc                 | 159.44421 ±<br>2.14938                       | 183.1203 ±<br>1.13396     | 204.02762 ±<br>0.89636     | 222.55568 ±<br>1.60906    | 326.62788 ±<br>0.82848    | 360.03715 ±<br>0.33334   | 430.72425 ±<br>0.35187   |
| w                  | 28.03719 ±<br>5.22539                        | 22.26128 ±<br>5.50615     | 28.55785 ±<br>5.95515      | 29.20812 ±<br>3.189       | 14.4475 ±<br>2.62756      | 18.00083 ±<br>1.07171    | 24.81114 ±<br>1.0726     |
| A                  | 650.51273 ±<br>175.55093                     | 1102.08441 ±<br>479.02076 | 2909.63597 ±<br>1064.29383 | 2111.20196 ±<br>669.6457  | 293.61803 ±<br>41.68224   | 1020.29745 ±<br>47.05772 | 1511.32926 ±<br>49.55328 |
| Plot               | Peak8<br>(Intensity)                         | Peak9<br>(Intensity)      | Peak10<br>(Intensity)      | Peak11<br>(Intensity)     | Peak12<br>(Intensity)     | Peak13<br>(Intensity)    |                          |
| y0                 | -3.8213 ±<br>0.20131                         | -3.8213 ±<br>0.20131      | -3.8213 ±<br>0.20131       | -3.8213 ±<br>0.20131      | -3.8213 ±<br>0.20131      | -3.8213 ±<br>0.20131     |                          |
| xc                 | 550.11207 ±<br>1.48106                       | 584.53307 ±<br>2.71951    | 888.41791 ±<br>0.04462     | 925.49493 ±<br>0.4012     | 942.89256 ±<br>0.07214    | 964.64988 ±<br>0.05791   |                          |
| w                  | 38.73845 ± 0                                 | 43.10164 ± 0              | 12.66885 ±<br>0.14024      | 18.09119 ±<br>1.27504     | 15.64452 ±<br>0.2728      | 7.21588 ±<br>0.1894      |                          |
| A                  | 910.02582 ±<br>65.02037                      | 601.78193 ±<br>67.64933   | 4218.93562 ±<br>36.38183   | 1269.93896 ±<br>103.07191 | 5164.85575 ±<br>102.15237 | 1400.17142 ±<br>30.3482  |                          |
| Reduced<br>Chi-Sqr | 10.98503                                     |                           |                            |                           |                           |                          |                          |
| R-Square<br>(COD)  | 0.99299                                      |                           |                            |                           |                           |                          |                          |
| Adj. R-<br>Square  | 0.99268                                      |                           |                            |                           |                           |                          |                          |

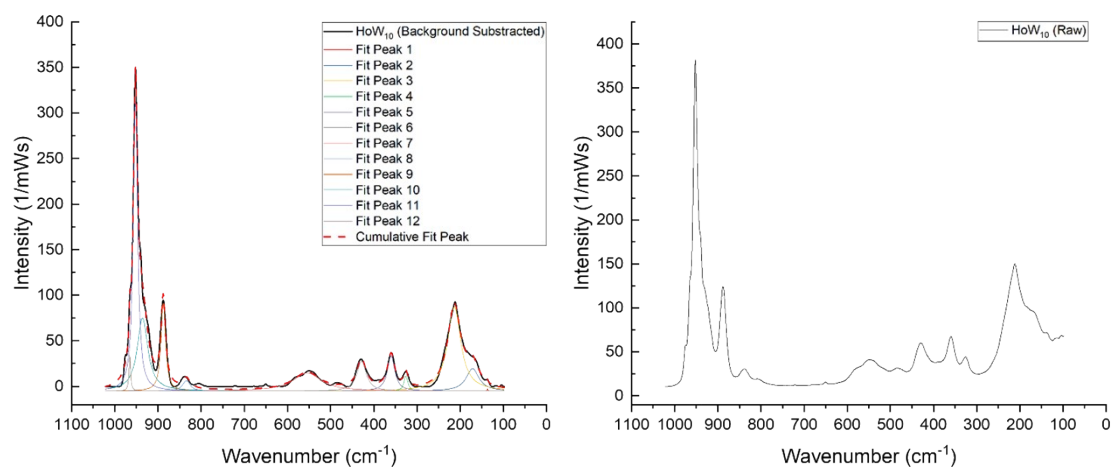

**Figure S35. (Left)** Background subtracted Raman spectrum of complex **10** (HoW<sub>10</sub>) fit to Lorentzian functions. **(Right)** Raw Raman spectrum for complex **10**.

**Table S27. Peak fitting parameters for Raman spectrum of complex 10.**

| Model              | Lorentz                                      |                           |                           |                           |                          |                          |
|--------------------|----------------------------------------------|---------------------------|---------------------------|---------------------------|--------------------------|--------------------------|
| Equation           | $y = y_0 + (2*A/\pi)*(w/(4*(x-xc)^2 + w^2))$ |                           |                           |                           |                          |                          |
| Plot               | Peak1<br>(Intensity)                         | Peak2<br>(Intensity)      | Peak3<br>(Intensity)      | Peak4<br>(Intensity)      | Peak5<br>(Intensity)     | Peak6<br>(Intensity)     |
| y0                 | -5.15579 ±<br>0.31037                        | -5.15579 ±<br>0.31037     | -5.15579 ±<br>0.31037     | -5.15579 ±<br>0.31037     | -5.15579 ±<br>0.31037    | -5.15579 ±<br>0.31037    |
| xc                 | 136.50065 ±<br>1.48541                       | 171.17673 ±<br>0.9212     | 213.57506 ±<br>0.25333    | 325.60043 ±<br>0.58834    | 359.89863 ±<br>0.34907   | 428.36284 ±<br>0.45074   |
| w                  | 2.41564 ±<br>5.91118                         | 35.58838 ±<br>3.27865     | 36.34657 ±<br>0.82169     | 10.97035 ±<br>1.834       | 20.41994 ±<br>1.13341    | 25.8764 ±<br>1.40946     |
| A                  | 10.55151 ±<br>16.9029                        | 1382.94991 ±<br>127.76801 | 5270.99351 ±<br>123.53303 | 283.05813 ±<br>36.584     | 1227.26424 ±<br>52.75593 | 1322.92483 ±<br>55.68471 |
| Plot               | Peak7<br>(Intensity)                         | Peak8<br>(Intensity)      | Peak9<br>(Intensity)      | Peak10<br>(Intensity)     | Peak11<br>(Intensity)    | Peak12<br>(Intensity)    |
| y0                 | -5.15579 ±<br>0.31037                        | -5.15579 ±<br>0.31037     | -5.15579 ±<br>0.31037     | -5.15579 ±<br>0.31037     | -5.15579 ±<br>0.31037    | -5.15579 ±<br>0.31037    |
| xc                 | 554.48895 ±<br>1.27341                       | 834.40936 ±<br>1.10812    | 887.82357 ±<br>0.10066    | 935.85083 ±<br>0.46362    | 952.20406 ±<br>0.03912   | 965.3809 ±<br>0.15269    |
| w                  | 78.30547 ±<br>4.66433                        | 21.08813 ±<br>3.47656     | 12.21955 ±<br>0.32111     | 29.53394 ±<br>1.06407     | 11.85647 ±<br>0.18906    | 4.47384 ±<br>0.51427     |
| A                  | 2456.27221 ±<br>134.04934                    | 379.87744 ±<br>49.01913   | 1850.42543 ±<br>38.59096  | 3729.45239 ±<br>176.79462 | 5935.3627 ±<br>123.7291  | 274.56501 ±<br>27.34255  |
| Reduced<br>Chi-Sqr | 12.03751                                     |                           |                           |                           |                          |                          |
| R-Square<br>(COD)  | 0.99358                                      |                           |                           |                           |                          |                          |
| Adj. R-<br>Square  | 0.9933                                       |                           |                           |                           |                          |                          |

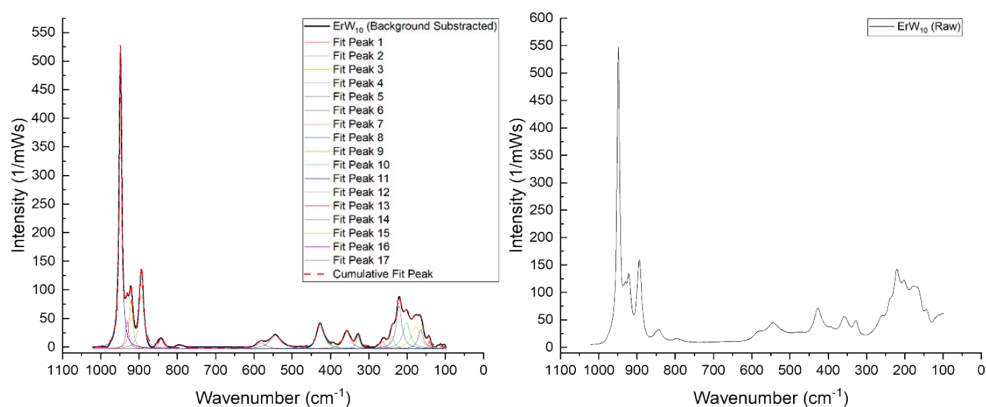

**Figure S36. (Left)** Background subtracted Raman spectrum of complex **11** ( $\text{ErW}_{10}$ ) fit to Lorentzian functions. **(Right)** Raw Raman spectrum for complex **11**.

**Table S28. Peak fitting parameters for Raman spectrum of complex **11**.**

| Model           | Lorentz                                                               |                           |                           |                           |                           |                           |                          |                          |                         |
|-----------------|-----------------------------------------------------------------------|---------------------------|---------------------------|---------------------------|---------------------------|---------------------------|--------------------------|--------------------------|-------------------------|
| Equation        | $y = y_0 + (2 \cdot A / \pi) \cdot (w / (4 \cdot (x - x_0)^2 + w^2))$ |                           |                           |                           |                           |                           |                          |                          |                         |
| Plot            | Peak1<br>(Intensity)                                                  | Peak2<br>(Intensity)      | Peak3<br>(Intensity)      | Peak4<br>(Intensity)      | Peak5<br>(Intensity)      | Peak6<br>(Intensity)      | Peak7<br>(Intensity)     | Peak8<br>(Intensity)     | Peak9<br>(Intensity)    |
| $y_0$           | $-2.57295 \pm 0.16242$                                                | $-2.57295 \pm 0.16242$    | $-2.57295 \pm 0.16242$    | $-2.57295 \pm 0.16242$    | $-2.57295 \pm 0.16242$    | $-2.57295 \pm 0.16242$    | $-2.57295 \pm 0.16242$   | $-2.57295 \pm 0.16242$   | $-2.57295 \pm 0.16242$  |
| $x_0$           | $142.34617 \pm 0.39463$                                               | $163.95516 \pm 0.64392$   | $177.6406 \pm 1.14645$    | $201.12081 \pm 0.47555$   | $220.66066 \pm 0.20774$   | $238.70978 \pm 0.43627$   | $261.67537 \pm 0.60601$  | $327.95741 \pm 0.30933$  | $356.98812 \pm 0.34629$ |
| $w$             | $5.67228 \pm 1.32403$                                                 | $15.68309 \pm 2.49927$    | $24.98159 \pm 4.73377$    | $22.5443 \pm 2.80578$     | $17.28984 \pm 1.03846$    | $12.34456 \pm 1.68776$    | $11.22567 \pm 1.94589$   | $10.63907 \pm 0.99556$   | $21.27942 \pm 1.14121$  |
| $A$             | $114.82462 \pm 22.96463$                                              | $823.49636 \pm 274.76954$ | $1551.4863 \pm 484.89149$ | $1597.0937 \pm 295.10426$ | $1996.4662 \pm 161.68754$ | $421.86429 \pm 63.51898$  | $211.60668 \pm 29.48396$ | $373.40241 \pm 28.15245$ | $976.81488 \pm 41.2265$ |
| Plot            | Peak10<br>(Intensity)                                                 | Peak11<br>(Intensity)     | Peak12<br>(Intensity)     | Peak13<br>(Intensity)     | Peak14<br>(Intensity)     | Peak15<br>(Intensity)     | Peak16<br>(Intensity)    | Peak17<br>(Intensity)    |                         |
| $y_0$           | $-2.57295 \pm 0.16242$                                                | $-2.57295 \pm 0.16242$    | $-2.57295 \pm 0.16242$    | $-2.57295 \pm 0.16242$    | $-2.57295 \pm 0.16242$    | $-2.57295 \pm 0.16242$    | $-2.57295 \pm 0.16242$   | $-2.57295 \pm 0.16242$   |                         |
| $x_0$           | $426.24457 \pm 0.21912$                                               | $544.02418 \pm 0.68629$   | $581.38374 \pm 1.52594$   | $842.39011 \pm 0.42801$   | $893.88167 \pm 0.05015$   | $921.19791 \pm 0.13122$   | $931.01681 \pm 0.20005$  | $948.66463 \pm 0.01099$  |                         |
| $w$             | $21.49291 \pm 0.66808$                                                | $33.0597 \pm 2.19893$     | $30.53211 \pm 4.99974$    | $13.45215 \pm 1.28347$    | $11.70831 \pm 0.15776$    | $10.73949 \pm 0.39355$    | $9.63341 \pm 0.69689$    | $7.95211 \pm 0.03544$    |                         |
| $A$             | $1472.18248 \pm 34.70302$                                             | $1176.76634 \pm 78.69389$ | $455.27207 \pm 76.2062$   | $358.41829 \pm 25.60835$  | $2518.83077 \pm 26.13016$ | $1442.99705 \pm 65.12958$ | $742.47665 \pm 65.06589$ | $6518.7246 \pm 23.51159$ |                         |
| Reduced Chi-Sqr | 6.20764                                                               |                           |                           |                           |                           |                           |                          |                          |                         |
| R-Square (COD)  | 0.99757                                                               |                           |                           |                           |                           |                           |                          |                          |                         |
| Adj. R-Square   | 0.99742                                                               |                           |                           |                           |                           |                           |                          |                          |                         |

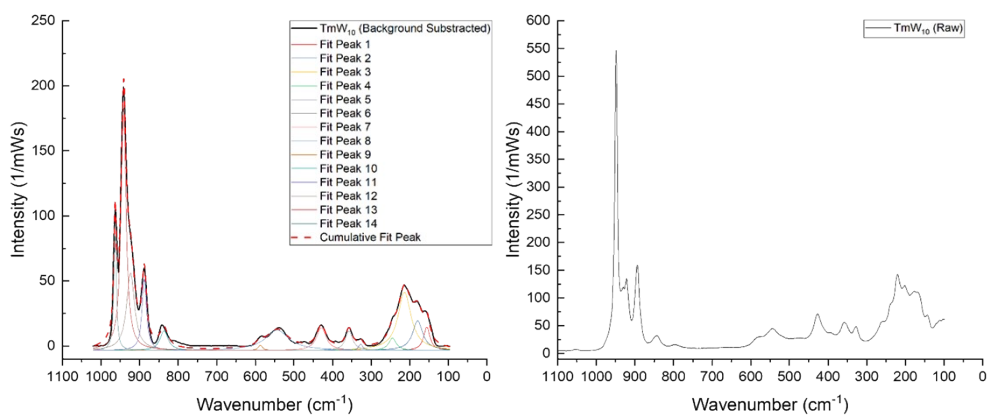

**Figure S37. (Left)** Background subtracted Raman spectrum of complex **12** ( $TmW_{10}$ ) fit to Lorentzian functions. **(Right)** Raw Raman spectrum for complex **12**.

**Table S29.** Peak fitting parameters for Raman spectrum of complex **12**.

| Model              | Lorentz                                                   |                           |                           |                          |                           |                           |                          |
|--------------------|-----------------------------------------------------------|---------------------------|---------------------------|--------------------------|---------------------------|---------------------------|--------------------------|
| Equation           | $y = y_0 + (2^* A / \pi) * (w / (4 * (x - x_c)^2 + w^2))$ |                           |                           |                          |                           |                           |                          |
| Plot               | Peak1<br>(Intensity)                                      | Peak2<br>(Intensity)      | Peak3<br>(Intensity)      | Peak4<br>(Intensity)     | Peak5<br>(Intensity)      | Peak6<br>(Intensity)      | Peak7<br>(Intensity)     |
| y0                 | -3.32657 ±<br>0.28031                                     | -3.32657 ±<br>0.28031     | -3.32657 ±<br>0.28031     | -3.32657 ±<br>0.28031    | -3.32657 ±<br>0.28031     | -3.32657 ±<br>0.28031     | -3.32657 ±<br>0.28031    |
| x <sub>c</sub>     | 155.53057 ±<br>1.05966                                    | 179.2298 ±<br>1.39368     | 213.28231 ±<br>0.87187    | 244.53931 ±<br>2.03363   | 326.90104 ±<br>1.9559     | 357.12303 ±<br>0.89931    | 428.82853 ±<br>0.82127   |
| w                  | 19.34995 ±<br>3.93527                                     | 31.59093 ±<br>8.41462     | 41.01969 ±<br>5.16222     | 23.43297 ±<br>8.48999    | 12.20829 ±<br>6.4301      | 22.46785 ±<br>3.03268     | 28.96437 ±<br>2.63865    |
| A                  | 544.2663 ±<br>168.28691                                   | 1126.71866 ±<br>433.92799 | 2873.31266 ±<br>498.46763 | 346.98584 ±<br>188.45811 | 92.61116 ±<br>40.34892    | 522.77159 ±<br>57.03721   | 788.4039 ±<br>56.64486   |
| Plot               | Peak8<br>(Intensity)                                      | Peak9<br>(Intensity)      | Peak10<br>(Intensity)     | Peak11<br>(Intensity)    | Peak12<br>(Intensity)     | Peak13<br>(Intensity)     | Peak14<br>(Intensity)    |
| y0                 | -3.32657 ±<br>0.28031                                     | -3.32657 ±<br>0.28031     | -3.32657 ±<br>0.28031     | -3.32657 ±<br>0.28031    | -3.32657 ±<br>0.28031     | -3.32657 ±<br>0.28031     | -3.32657 ±<br>0.28031    |
| x <sub>c</sub>     | 543.63258 ±<br>2.0473                                     | 587.13701 ±<br>2.52912    | 836.72544 ±<br>0.8463     | 888.05465 ±<br>0.17854   | 923.4078 ±<br>0.45452     | 941.54361 ±<br>0.08245    | 963.44761 ±<br>0.08072   |
| w                  | 73.50244 ±<br>6.89525                                     | 13.46822 ±<br>9.7723      | 24.60006 ±<br>2.71977     | 13.57051 ±<br>0.6161     | 24.85823 ±<br>1.40848     | 15.4876 ±<br>0.32658      | 7.6697 ±<br>0.26408      |
| A                  | 1788.50777 ±<br>166.12602                                 | 80.77858 ±<br>57.23207    | 581.13261 ±<br>51.1563    | 1165.85891 ±<br>46.28604 | 2328.73638 ±<br>162.61203 | 4530.05136 ±<br>126.80038 | 1071.75593 ±<br>30.48672 |
| Reduced<br>Chi-Sqr | 6.22488                                                   |                           |                           |                          |                           |                           |                          |
| R-Square<br>(COD)  | 0.99315                                                   |                           |                           |                          |                           |                           |                          |
| Adj. R-<br>Square  | 0.99259                                                   |                           |                           |                          |                           |                           |                          |



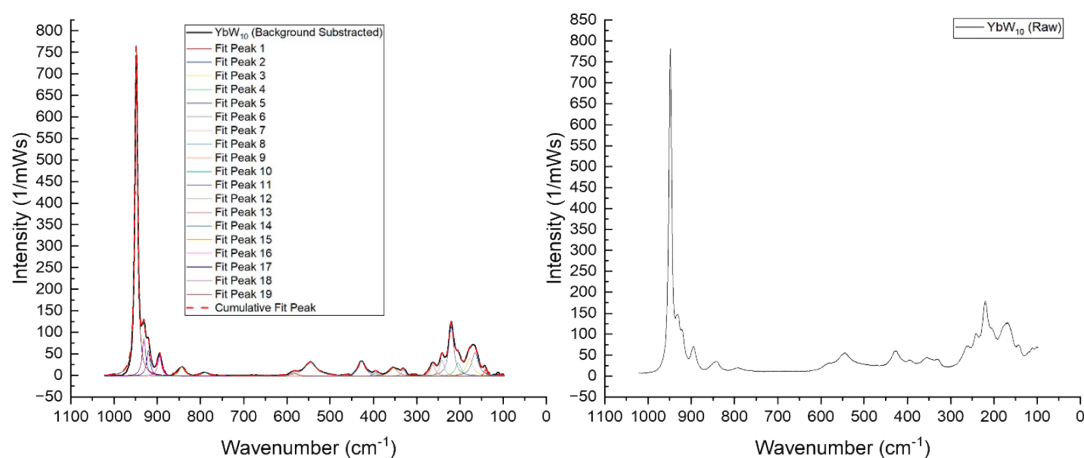

**Figure S38.** (Left) Background subtracted Raman spectrum of complex **13** ( $\text{YbW}_{10}$ ) fit to Lorentzian functions. (Right) Raw Raman spectrum for complex **13**.

**Table S30.** Peak fitting parameters for Raman spectrum of complex **13**.

| Model           | Lorentz                                                   |                        |                        |                       |                        |                       |                       |                       |                       |                       |
|-----------------|-----------------------------------------------------------|------------------------|------------------------|-----------------------|------------------------|-----------------------|-----------------------|-----------------------|-----------------------|-----------------------|
| Equation        | $y = y_0 + (2 * A / \pi) * (w / (4 * (x - x_c)^2 + w^2))$ |                        |                        |                       |                        |                       |                       |                       |                       |                       |
| Plot            | Peak1<br>(Intensity)                                      | Peak2<br>(Intensity)   | Peak3<br>(Intensity)   | Peak4<br>(Intensity)  | Peak5<br>(Intensity)   | Peak6<br>(Intensity)  | Peak7<br>(Intensity)  | Peak8<br>(Intensity)  | Peak9<br>(Intensity)  | Peak10<br>(Intensity) |
| y0              | -1.57594 ± 0                                              | -1.57594 ± 0           | -1.57594 ± 0           | -1.57594 ± 0          | -1.57594 ± 0           | -1.57594 ± 0          | -1.57594 ± 0          | -1.57594 ± 0          | -1.57594 ± 0          | -1.57594 ± 0          |
| x <sub>c</sub>  | 142.06612 ± 0.45755                                       | 165.1466 ± 0.7484      | 177.58063 ± 0.97463    | 203.83679 ± 0.52617   | 219.87538 ± 0.13602    | 241.62165 ± 0.29625   | 262.80605 ± 0.4375    | 330.98736 ± 0.71067   | 353.29041 ± 0.84347   | 394.64074 ± 1.36194   |
| w               | 5.44794 ± 1.52575                                         | 18.28082 ± 1.80867     | 18.16372 ± 2.87665     | 15.09187 ± 2.2679     | 14.04623 ± 0.54651     | 12.16892 ± 1.15315    | 13.40715 ± 1.41081    | 10.35215 ± 2.47853    | 21.88668 ± 2.96962    | 13.44784 ± 4.5724     |
| A               | 126.90263 ± 29.76482                                      | 1564.60582 ± 301.32906 | 1168.77217 ± 326.02538 | 744.73837 ± 129.3076  | 2521.17813 ± 110.45707 | 724.10415 ± 63.12785  | 546.88467 ± 47.74276  | 222.4029 ± 49.28459   | 650.39004 ± 75.60801  | 165.30121 ± 45.38872  |
| Plot            | Peak11<br>(Intensity)                                     | Peak12<br>(Intensity)  | Peak13<br>(Intensity)  | Peak14<br>(Intensity) | Peak15<br>(Intensity)  | Peak16<br>(Intensity) | Peak17<br>(Intensity) | Peak18<br>(Intensity) | Peak19<br>(Intensity) |                       |
| y0              | -1.57594 ± 0                                              | -1.57594 ± 0           | -1.57594 ± 0           | -1.57594 ± 0          | -1.57594 ± 0           | -1.57594 ± 0          | -1.57594 ± 0          | -1.57594 ± 0          | -1.57594 ± 0          |                       |
| x <sub>c</sub>  | 427.09809 ± 0.3614                                        | 545.71885 ± 0.56393    | 583.48875 ± 1.69091    | 789.81053 ± 1.6419    | 843.343 ± 0.49196      | 894.88349 ± 0.18168   | 920.71926 ± 0.21137   | 931.00772 ± 0.14268   | 948.58158 ± 0.00997   |                       |
| w               | 18.73297 ± 1.13582                                        | 32.26173 ± 1.80386     | 17.94324 ± 5.66779     | 20.29093 ± 4.83127    | 14.71944 ± 1.46234     | 9.98882 ± 0.55476     | 9.66076 ± 0.67968     | 9.77226 ± 0.50813     | 7.49652 ± 0.03174     |                       |
| A               | 1024.37714 ± 47.25217                                     | 1618.84248 ± 74.49974  | 206.69985 ± 56.87218   | 238.40736 ± 40.78158  | 488.91766 ± 35.22682   | 742.67209 ± 30.63028  | 892.6115 ± 71.35549   | 1333.44753 ± 76.39619 | 8935.75016 ± 30.18851 |                       |
| Reduced Chi-Sqr | 11.58636                                                  |                        |                        |                       |                        |                       |                       |                       |                       |                       |
| R-Square (COD)  | 0.99746                                                   |                        |                        |                       |                        |                       |                       |                       |                       |                       |
| Adj. R-Square   | 0.99729                                                   |                        |                        |                       |                        |                       |                       |                       |                       |                       |

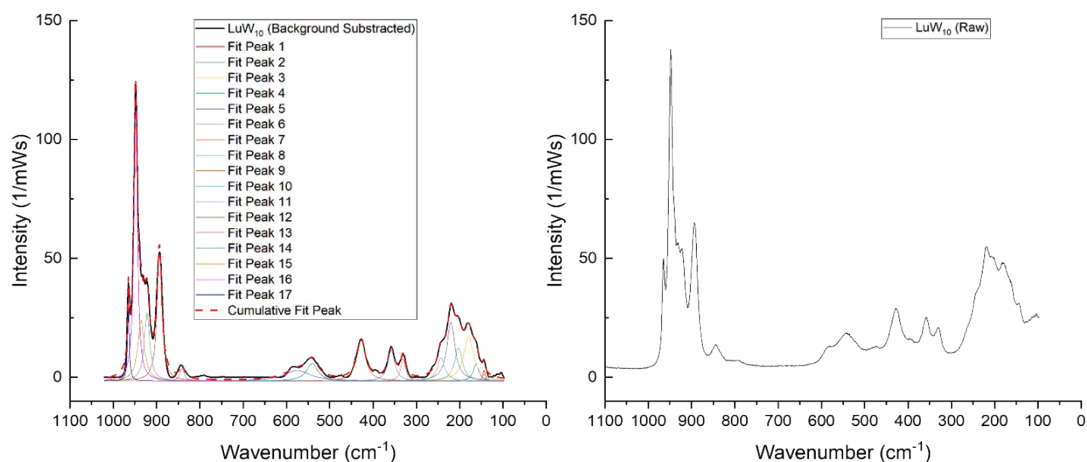

**Figure S39.** (Left) Background subtracted Raman spectrum of complex **14** ( $\text{LuW}_{10}$ ) fit to Lorentzian functions. (Right) Raw Raman spectrum for complex **14**.

**Table S31.** Peak fitting parameters for Raman spectrum of complex **14**.

| Model           | Lorentz                                                               |                       |                       |                       |                       |                       |                       |                       |                      |
|-----------------|-----------------------------------------------------------------------|-----------------------|-----------------------|-----------------------|-----------------------|-----------------------|-----------------------|-----------------------|----------------------|
| Equation        | $y = y_0 + (2 \cdot A / \pi) \cdot (w / (4 \cdot (x - x_c)^2 + w^2))$ |                       |                       |                       |                       |                       |                       |                       |                      |
| Plot            | Peak1<br>(Intensity)                                                  | Peak2<br>(Intensity)  | Peak3<br>(Intensity)  | Peak4<br>(Intensity)  | Peak5<br>(Intensity)  | Peak6<br>(Intensity)  | Peak7<br>(Intensity)  | Peak8<br>(Intensity)  | Peak9<br>(Intensity) |
| $y_0$           | -1.5271 ± 0.10874                                                     | -1.5271 ± 0.10874     | -1.5271 ± 0.10874     | -1.5271 ± 0.10874     | -1.5271 ± 0.10874     | -1.5271 ± 0.10874     | -1.5271 ± 0.10874     | -1.5271 ± 0.10874     | -1.5271 ± 0.10874    |
| $x_c$           | 143.53553 ± 0.6021                                                    | 161.9763 ± 1.01224    | 179.02571 ± 0.84521   | 202.58103 ± 0.89919   | 219.96742 ± 0.55658   | 242.95444 ± 0.77109   | 330.53956 ± 0.39705   | 357.69378 ± 0.35548   | 427.44238 ± 0.27839  |
| $w$             | 6.5617 ± 2.08449                                                      | 15.46924 ± 4.64417    | 27.83429 ± 4.37326    | 21.44611 ± 4.85814    | 22.52026 ± 2.48354    | 20.46131 ± 2.4236     | 13.04824 ± 1.30329    | 18.83612 ± 1.17766    | 23.83136 ± 0.85881   |
| $A$             | 45.24377 ± 12.927                                                     | 170.45183 ± 86.66066  | 816.30862 ± 187.48321 | 469.22536 ± 178.87641 | 874.78223 ± 152.19054 | 314.98535 ± 52.67001  | 190.16536 ± 15.75302  | 378.72798 ± 19.26669  | 637.47057 ± 17.66765 |
| Plot            | Peak10<br>(Intensity)                                                 | Peak11<br>(Intensity) | Peak12<br>(Intensity) | Peak13<br>(Intensity) | Peak14<br>(Intensity) | Peak15<br>(Intensity) | Peak16<br>(Intensity) | Peak17<br>(Intensity) |                      |
| $y_0$           | -1.5271 ± 0.10874                                                     | -1.5271 ± 0.10874     | -1.5271 ± 0.10874     | -1.5271 ± 0.10874     | -1.5271 ± 0.10874     | -1.5271 ± 0.10874     | -1.5271 ± 0.10874     | -1.5271 ± 0.10874     |                      |
| $x_c$           | 540.79735 ± 1.15483                                                   | 574.53346 ± 6.73794   | 841.38369 ± 0.61531   | 893.42023 ± 0.06636   | 922.15657 ± 0.28663   | 936.04982 ± 0.35765   | 948.45836 ± 0.04044   | 965.07238 ± 0.06625   |                      |
| $w$             | 31.57012 ± 5.27392                                                    | 72.81944 ± 11.43938   | 12.24784 ± 1.86149    | 13.48841 ± 0.21752    | 14.96935 ± 0.90919    | 17.58372 ± 2.26592    | 9.77441 ± 0.17318     | 4.87237 ± 0.21228     |                      |
| $A$             | 361.43949 ± 99.87321                                                  | 501.88078 ± 141.96962 | 101.83494 ± 11.73204  | 1131.50174 ± 14.99203 | 677.30642 ± 71.61584  | 708.15771 ± 125.69339 | 1752.08256 ± 49.17821 | 237.10942 ± 8.40695   |                      |
| Reduced Chi-Sqr | 1.37166                                                               |                       |                       |                       |                       |                       |                       |                       |                      |
| R-Square (COD)  | 0.99461                                                               |                       |                       |                       |                       |                       |                       |                       |                      |
| Adj. R-Square   | 0.99428                                                               |                       |                       |                       |                       |                       |                       |                       |                      |

**Table S32.** Observed peaks in the Raman spectra of complexes **1-14**.

| Complex name                   | Observed peaks rounded to the first decimal (cm <sup>-1</sup> )                                                                            |
|--------------------------------|--------------------------------------------------------------------------------------------------------------------------------------------|
| <b>1</b> (LaW <sub>10</sub> )  | 139.2, 158.9, 177.1, 196.4, 214.1, 231.5, 320.6, 359.4, 409.1, 428.4, 486.2, 540, 577.2, 806.9, 837.7, 930.7, 952.5                        |
| <b>2</b> (CeW <sub>10</sub> )  | 128.7, 161.3, 179.6, 209.5, 359.2, 425.1, 476.5, 542.5, 581.8, 810.5, 837.1, 884.6, 943.8, 967.6                                           |
| <b>3</b> (PrW <sub>10</sub> )  | 132.7, 160.6, 183, 201, 219.5, 315.3, 359.3, 421.6, 478.5, 543.2, 576.3, 798.4, 839.8, 885.1, 924.6, 937.9, 951.1, 959.2                   |
| <b>4</b> (NdW <sub>10</sub> )  | 158.2, 182.3, 209.9, 357.8, 425.0, 477.8, 551.8, 719.9, 808.8, 836.8, 886.3, 943.9, 965.2                                                  |
| <b>5</b> (SmW <sub>10</sub> )  | 134.0, 174.3, 207.9, 223.6, 320.0, 360.4, 425.6, 481.5, 544.3, 579.5, 804.1, 838.5, 887.6, 932.5, 953.3                                    |
| <b>6</b> (EuW <sub>10</sub> )  | 136.6, 162.3, 177.5, 195.9, 209.1, 223.4, 260.8, 321.1, 357.6, 425.8, 545.4, 587.7, 796.7, 839.4, 889.3, 921.0, 930.6, 948.4, 965.9, 976.6 |
| <b>7</b> (GdW <sub>10</sub> )  | 130.5, 156.3, 192.3, 215.9, 315.3, 360.5, 423.1, 478.0, 543.5, 587.9, 804.8, 839.2, 883.3, 940.2, 951.9, 961.8                             |
| <b>8</b> (TbW <sub>10</sub> )  | 134.4, 163.9, 182.9, 212.6, 326.5, 361.0, 432.3, 484.6, 550.8, 583.0, 721.4, 806.4, 836.8, 888.5, 927.3, 943.3, 965.7                      |
| <b>9</b> (DyW <sub>10</sub> )  | 159.4, 183.1, 204.0, 222.6, 326.6, 360.0, 430.7, 550.1, 584.5, 888.4, 925.5, 942.5, 942.9, 964.6                                           |
| <b>10</b> (HoW <sub>10</sub> ) | 136.5, 171.2, 213.6, 325.6, 359.9, 428.4, 554.5, 834.4, 997.9, 935.9, 952.2, 965.4                                                         |
| <b>11</b> (ErW <sub>10</sub> ) | 142.3, 164.0, 177.6, 201.1, 220.7, 238.7, 261.7, 328.0, 357.0, 426.2, 544.0, 581.4, 842.4, 893.9, 921.2, 931.0, 948.7                      |
| <b>12</b> (TmW <sub>10</sub> ) | 155.5, 179.2, 213.3, 244.5, 326.9, 357.1, 428.8, 543.6, 587.1, 836.7, 888.1, 923.4, 941.5, 963.4                                           |
| <b>13</b> (YbW <sub>10</sub> ) | 142.1, 165.1, 177.6, 203.8, 219.9, 241.6, 262.8, 331.0, 353.3, 394.6, 427.1, 545.7, 583.5, 789.8, 843.3, 894.9, 920.7, 931.0, 948.6        |
| <b>14</b> (LuW <sub>10</sub> ) | 143.5, 162.0, 179.0, 202.6, 220.0, 243.0, 330.5, 357.7, 427.4, 540.8, 574.5, 841.4, 893.4, 922.2, 936.0, 948.5, 965.1                      |

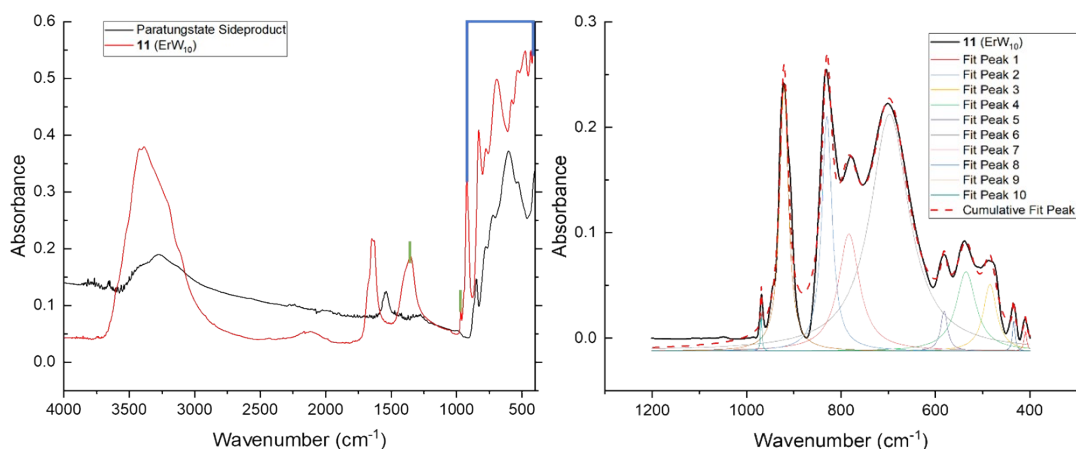

**Figure S40.** (Left) MIR spectrum of complex **11** ( $\text{ErW}_{10}$ ) in red trace overlaid on MIR spectrum of sodium paratungstate ( $\text{Na}_{10}\text{H}_2\text{W}_{12}\text{O}_{40}\cdot\text{XH}_2\text{O}$ ) in black trace. Peaks highlighted with green lines are from  $\text{NaNO}_3$  ( $\nu_{\text{as}}(\text{NO}_3)$  at  $1357\text{ cm}^{-1}$  and  $\nu(\text{NO}_3)$  at  $968\text{ cm}^{-1}$ ), while peaks highlighted by blue lines are characteristic of complex **11**. (Right) Peak fitting conducted on background subtracted MIR spectra of complex **11** with a spectral window of  $1200 - 400\text{ cm}^{-1}$ .

**Table S33.** Peak fitting parameters for MIR spectrum of complex **11**.

| Model           | Lorentz                                      |                         |                         |                         |                         |
|-----------------|----------------------------------------------|-------------------------|-------------------------|-------------------------|-------------------------|
| Equation        | $y = y_0 + (2*A/\pi)*(w/(4*(x-xc)^2 + w^2))$ |                         |                         |                         |                         |
| Plot            | Peak1(Absorbance)                            | Peak2(Absorbance)       | Peak3(Absorbance)       | Peak4(Absorbance)       | Peak5(Absorbance)       |
| y0              | $-0.01217 \pm 0.00117$                       | $-0.01217 \pm 0.00117$  | $-0.01217 \pm 0.00117$  | $-0.01217 \pm 0.00117$  | $-0.01217 \pm 0.00117$  |
| xc              | $409.49463 \pm 1.83663$                      | $434.14856 \pm 1.18035$ | $484.42164 \pm 1.50333$ | $535.2119 \pm 1.7141$   | $581.73622 \pm 1.5098$  |
| w               | $6.90019 \pm 5.52321$                        | $6.48957 \pm 3.49072$   | $34.16717 \pm 5.58469$  | $50.66594 \pm 8.1525$   | $17.36906 \pm 5.67881$  |
| A               | $0.20138 \pm 0.11698$                        | $0.28889 \pm 0.11714$   | $3.39713 \pm 0.60988$   | $5.98339 \pm 0.9645$    | $1.03615 \pm 0.33195$   |
| Plot            | Peak6(Absorbance)                            | Peak7(Absorbance)       | Peak8(Absorbance)       | Peak9(Absorbance)       | Peak10(Absorbance)      |
| y0              | $-0.01217 \pm 0.00117$                       | $-0.01217 \pm 0.00117$  | $-0.01217 \pm 0.00117$  | $-0.01217 \pm 0.00117$  | $-0.01217 \pm 0.00117$  |
| xc              | $697.07477 \pm 0.92848$                      | $783.26797 \pm 1.24826$ | $829.85105 \pm 0.34842$ | $920.72996 \pm 0.24127$ | $968.94064 \pm 0.56284$ |
| w               | $99.42783 \pm 3.24602$                       | $54.01111 \pm 5.91018$  | $26.09676 \pm 1.30755$  | $21.81061 \pm 0.74384$  | $3.25548 \pm 2.55137$   |
| A               | $35.05256 \pm 1.22548$                       | $9.42117 \pm 1.15994$   | $9.12435 \pm 0.50266$   | $8.63811 \pm 0.22588$   | $0.19416 \pm 0.07955$   |
| Reduced Chi-Sqr | 1.38E-04                                     |                         |                         |                         |                         |
| R-Square (COD)  | 0.97829                                      |                         |                         |                         |                         |
| Adj. R-Square   | 0.9766                                       |                         |                         |                         |                         |

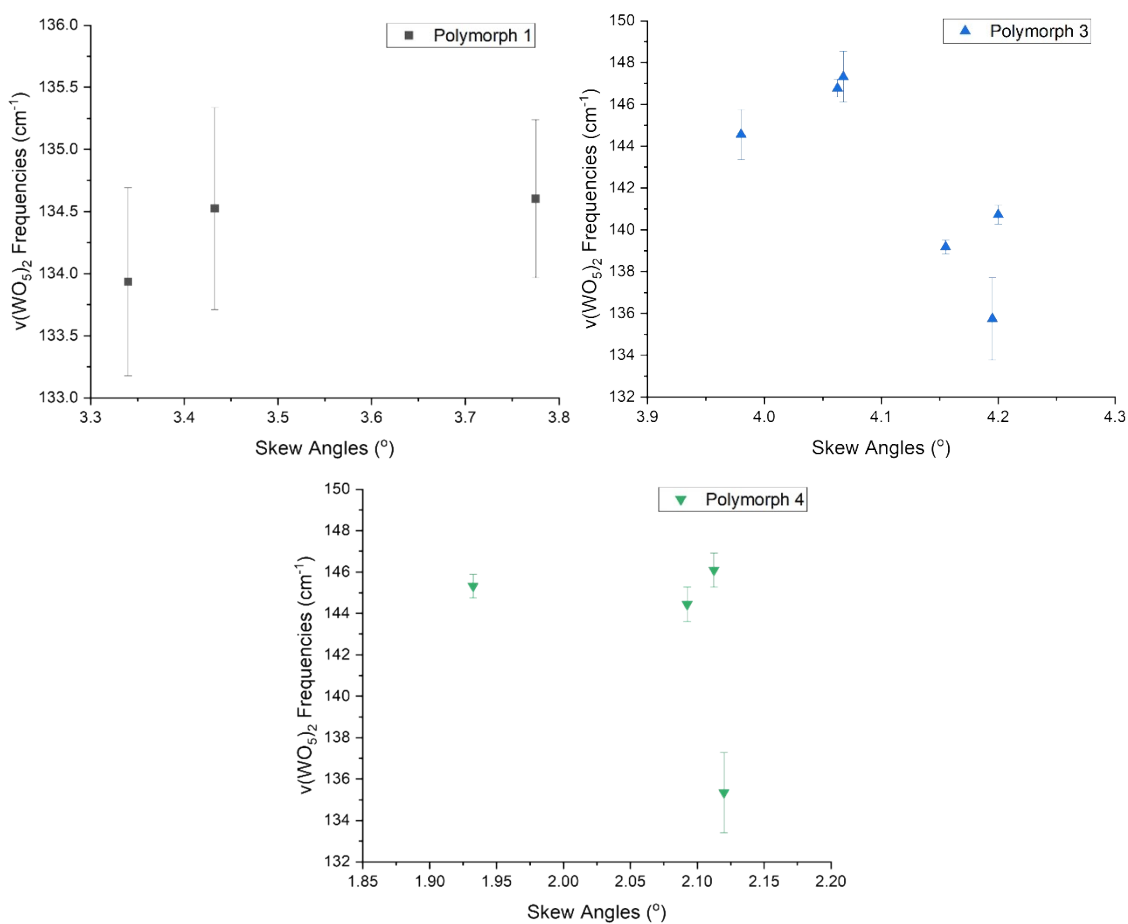

**Figure S41.** Plots of FIR  $\nu(\text{WO}_5)_2$  frequencies vs. SAs for  $\text{LnW}_{10}$  polymorphs. The  $\nu(\text{WO}_5)_2$  frequencies were obtained from the fitted FIR spectra of complexes **1-14**. Error bars represent uncertainties of the peak center obtained from the fitting regime.

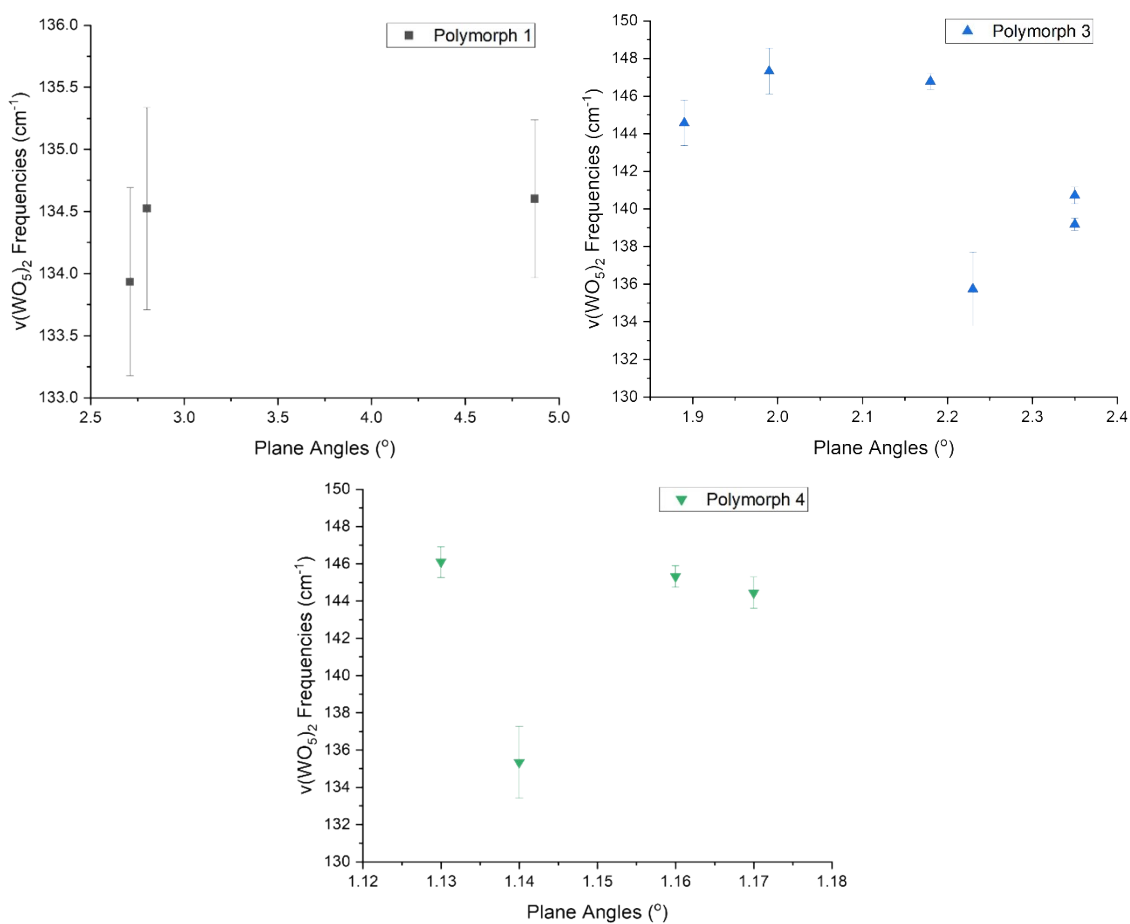

**Figure S42.** Plots of FIR  $\nu(\text{WO}_5)_2$  frequencies vs. PAs for  $\text{LnW}_{10}$  polymorphs. The  $\nu(\text{WO}_5)_2$  frequencies were obtained from the fitted FIR spectra of complexes **1-14**. Error bars represent uncertainties of the peak center obtained from the fitting regime.

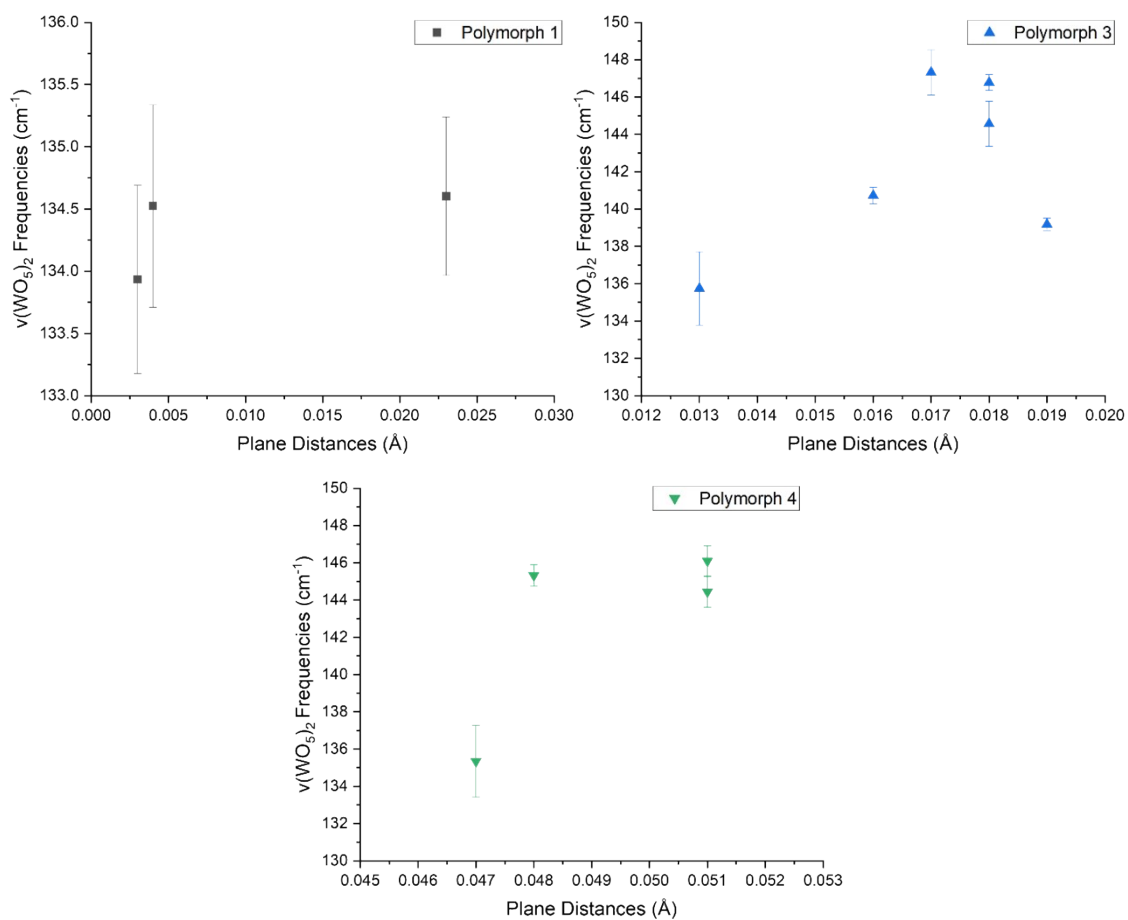

**Figure S43.** Plots of FIR  $\nu(\text{WO}_5)_2$  frequencies vs. PDs for  $\text{LnW}_{10}$  polymorphs. The  $\nu(\text{WO}_5)_2$  frequencies were obtained from the fitted FIR spectra of complexes **1-14**. Error bars represent uncertainties of the peak center obtained from the fitting regime.

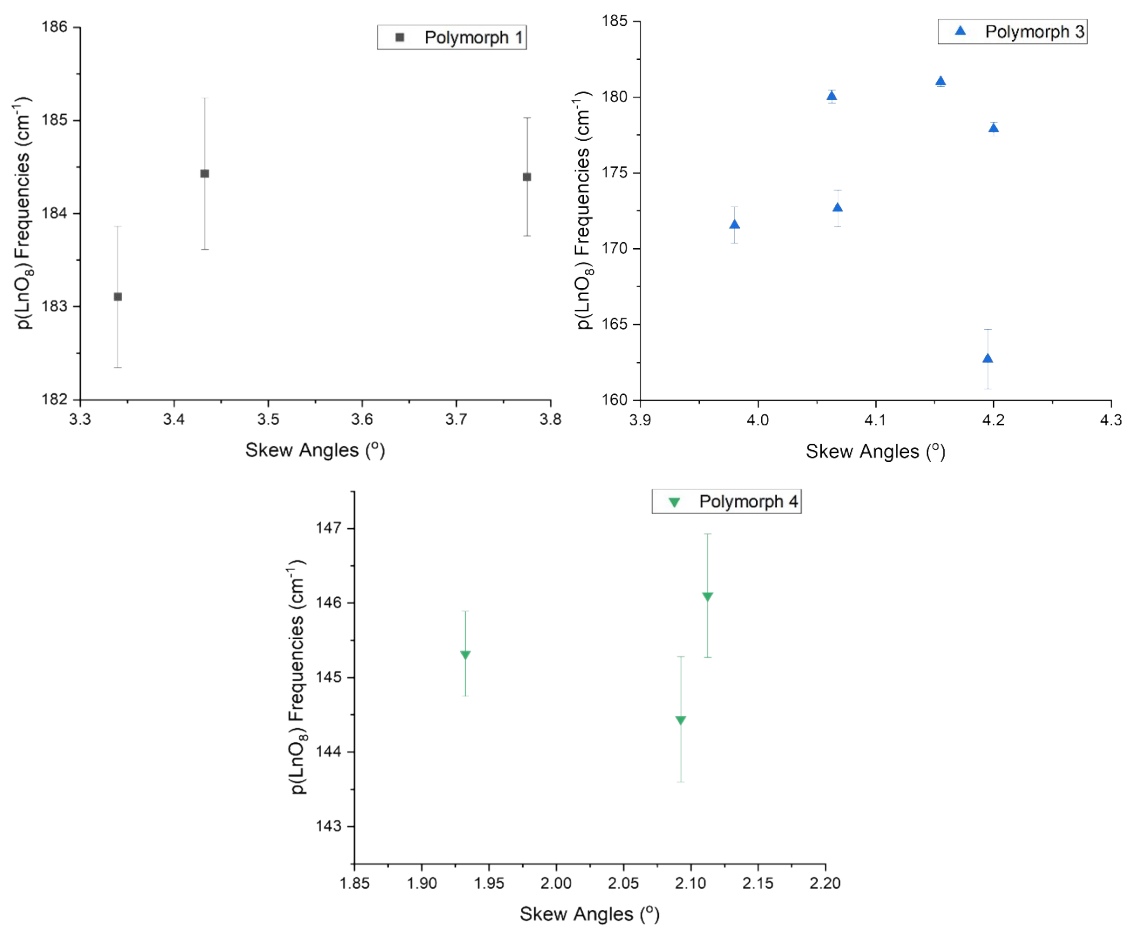

**Figure S44.** Plots of FIR  $\rho(\text{LnO}_8)$  frequencies vs. SAs for  $\text{LnW}_{10}$  polymorphs. The  $\rho(\text{LnO}_8)$  frequencies were obtained from the fitted FIR spectra of complexes **1-14**. Error bars represent uncertainties of the peak center obtained from the fitting regime.



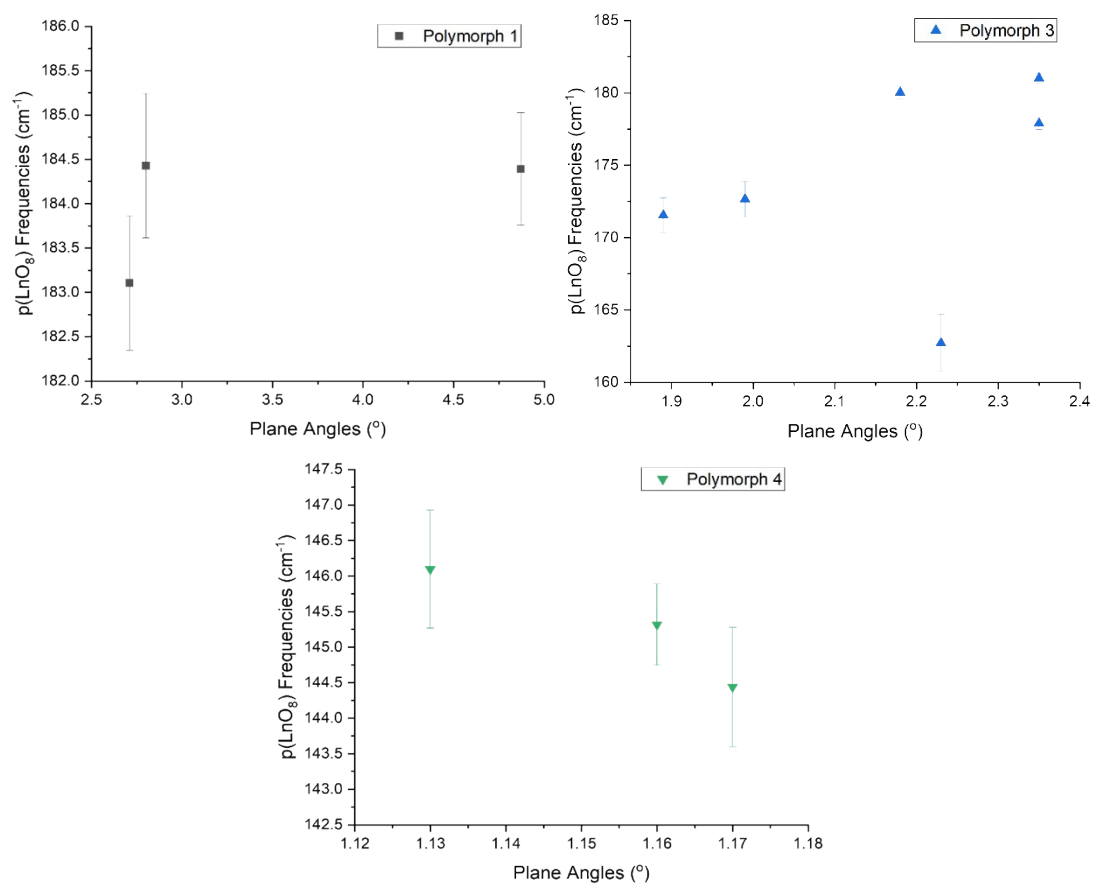

**Figure S45.** Plots of FIR  $\rho(\text{LnO}_8)$  frequencies vs. PAs for  $\text{LnW}_{10}$  polymorphs. The  $\rho(\text{LnO}_8)$  frequencies were obtained from the fitted FIR spectra of complexes **1-14**. Error bars represent uncertainties of the peak center obtained from the fitting regime.

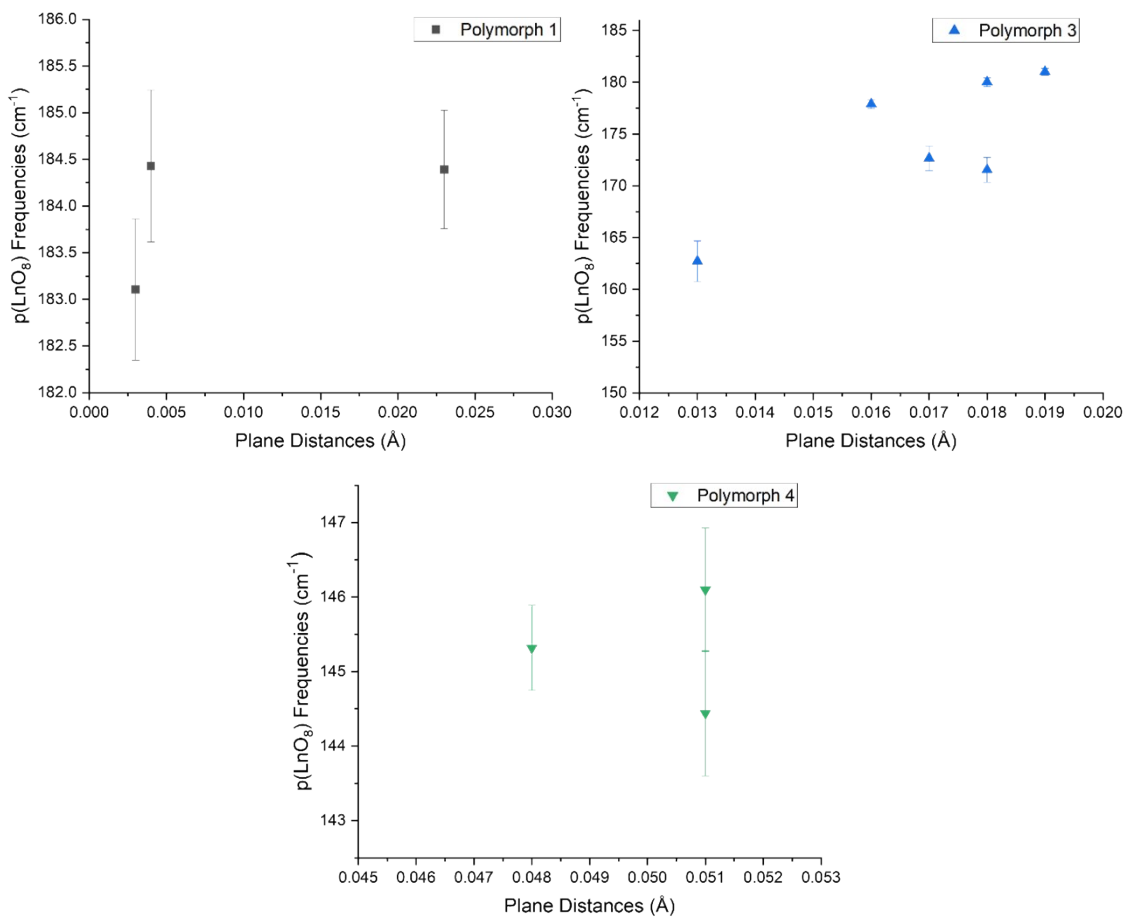

**Figure S46.** Plots of FIR  $\rho(\text{LnO}_8)$  frequencies vs. PDs for  $\text{LnW}_{10}$  polymorphs. The  $\rho(\text{LnO}_8)$  frequencies were obtained from the fitted FIR spectra of complexes **1-14**. Error bars represent uncertainties of the peak center obtained from the fitting regime.

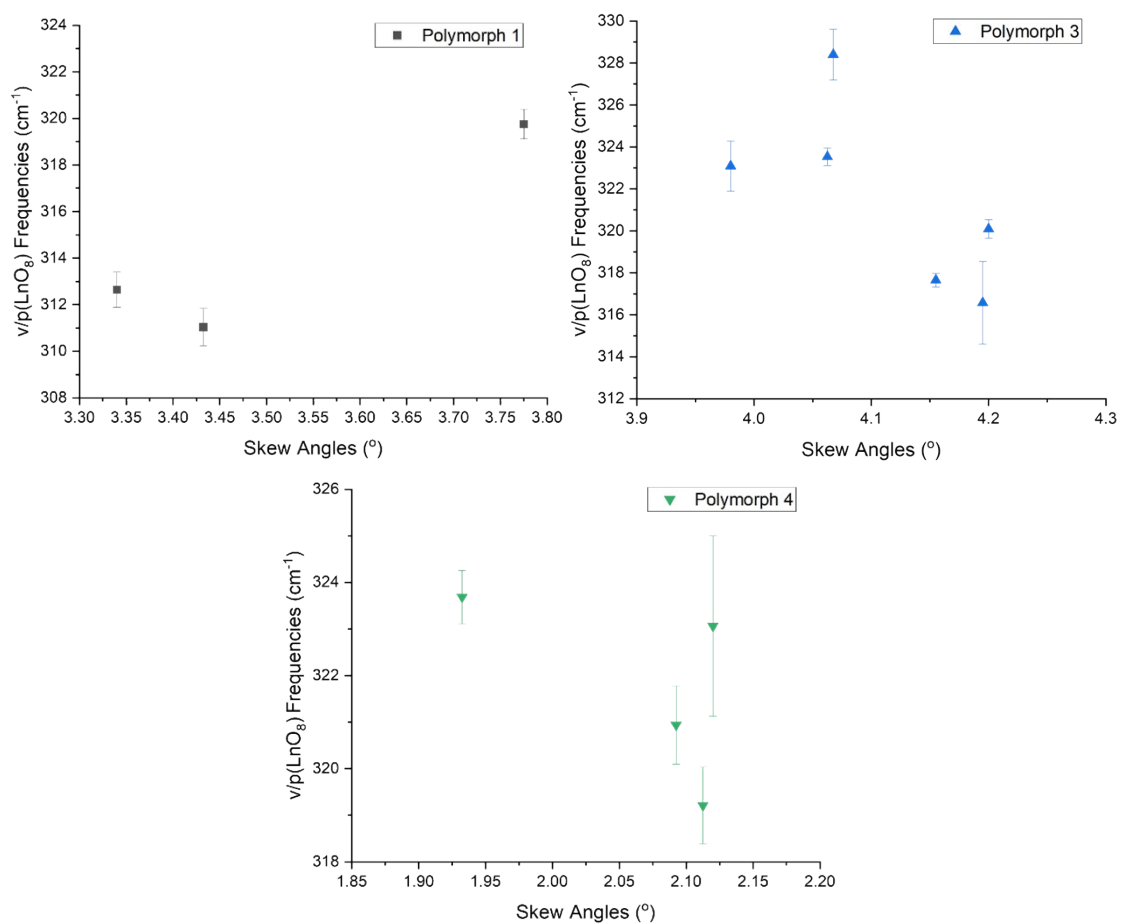

**Figure S47.** Plots of FIR  $\nu/\rho(\text{LnO}_8)$  frequencies vs. SAs for  $\text{LnW}_{10}$  polymorphs. The  $\nu/\rho(\text{LnO}_8)$  frequencies were obtained from the fitted FIR spectra of complexes **1-14**. Error bars represent uncertainties of the peak center obtained from the fitting regime.

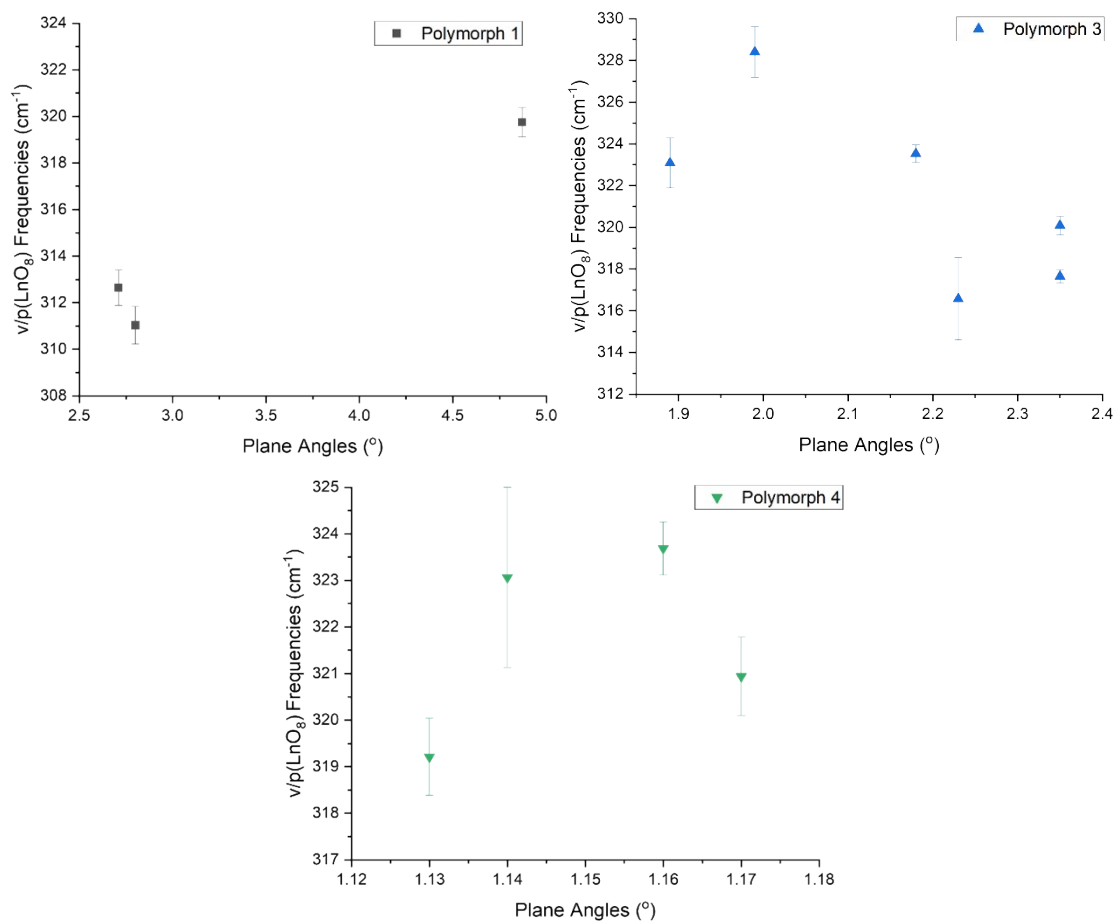

**Figure S48.** Plots of FIR  $\nu/p(\text{LnO}_8)$  frequencies vs. PAs for  $\text{LnW}_{10}$  polymorphs. The  $\nu/p(\text{LnO}_8)$  frequencies were obtained from the fitted FIR spectra of complexes **1-14**. Error bars represent uncertainties of the peak center obtained from the fitting regime.

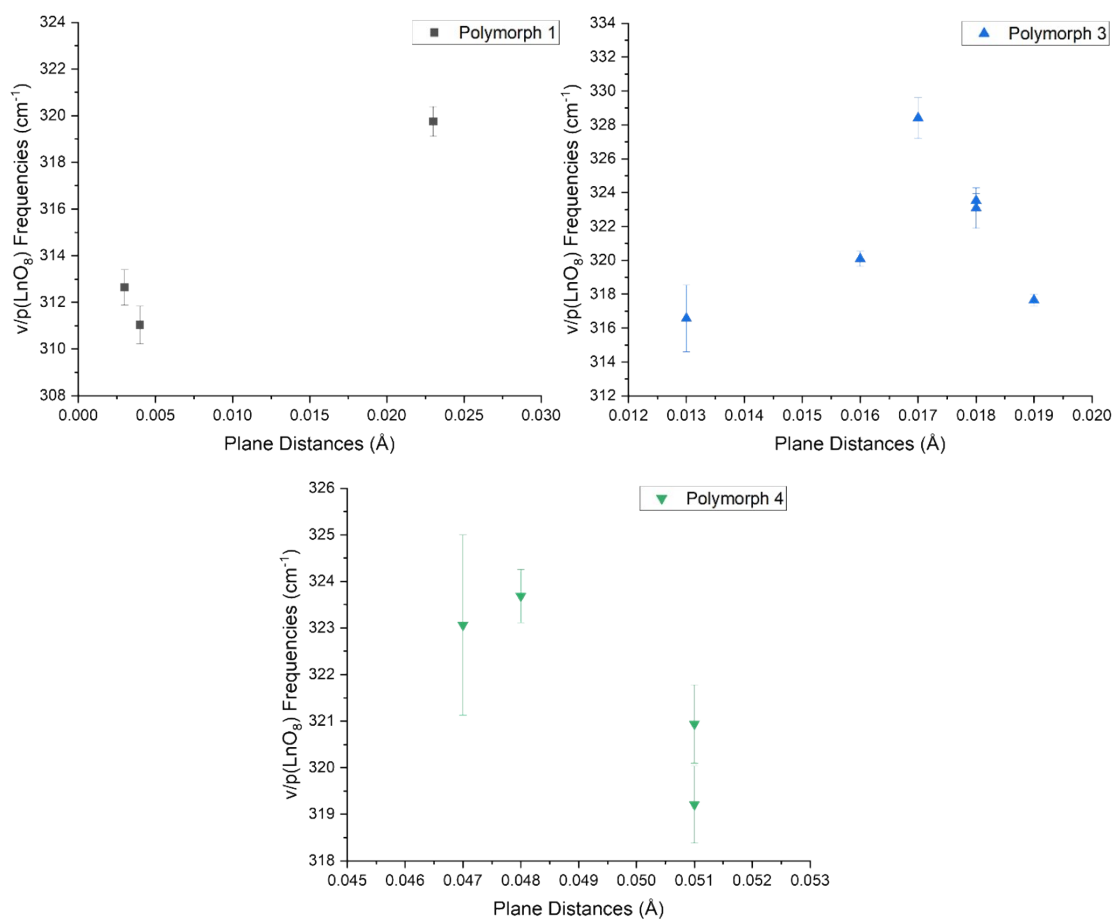

**Figure S49.** Plots of FIR  $\nu/p(\text{LnO}_8)$  frequencies vs. PDs for  $\text{LnW}_{10}$  polymorphs. The  $\nu/p(\text{LnO}_8)$  frequencies were obtained from the fitted FIR spectra of complexes **1-14**. Error bars represent uncertainties of the peak center obtained from the fitting regime.

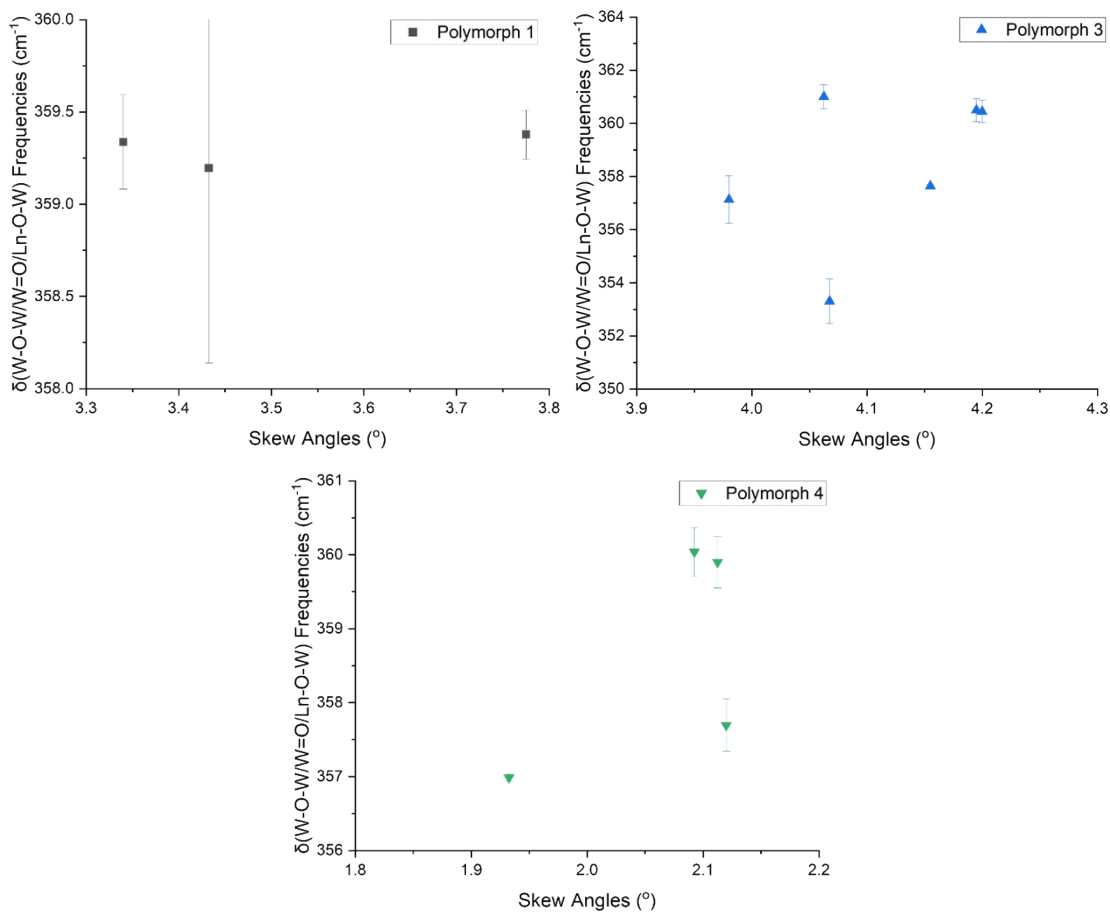

**Figure S50.** Plots of Raman  $\delta(\text{W-O-W/W=O/Ln-O-W})$  frequencies vs. SAs for  $\text{LnW}_{10}$  polymorphs. The  $\delta(\text{W-O-W/W=O/Ln-O-W})$  frequencies were obtained from the fitted Raman spectra of complexes **1-14**. Error bars represent uncertainties of the peak center obtained from the fitting regime.

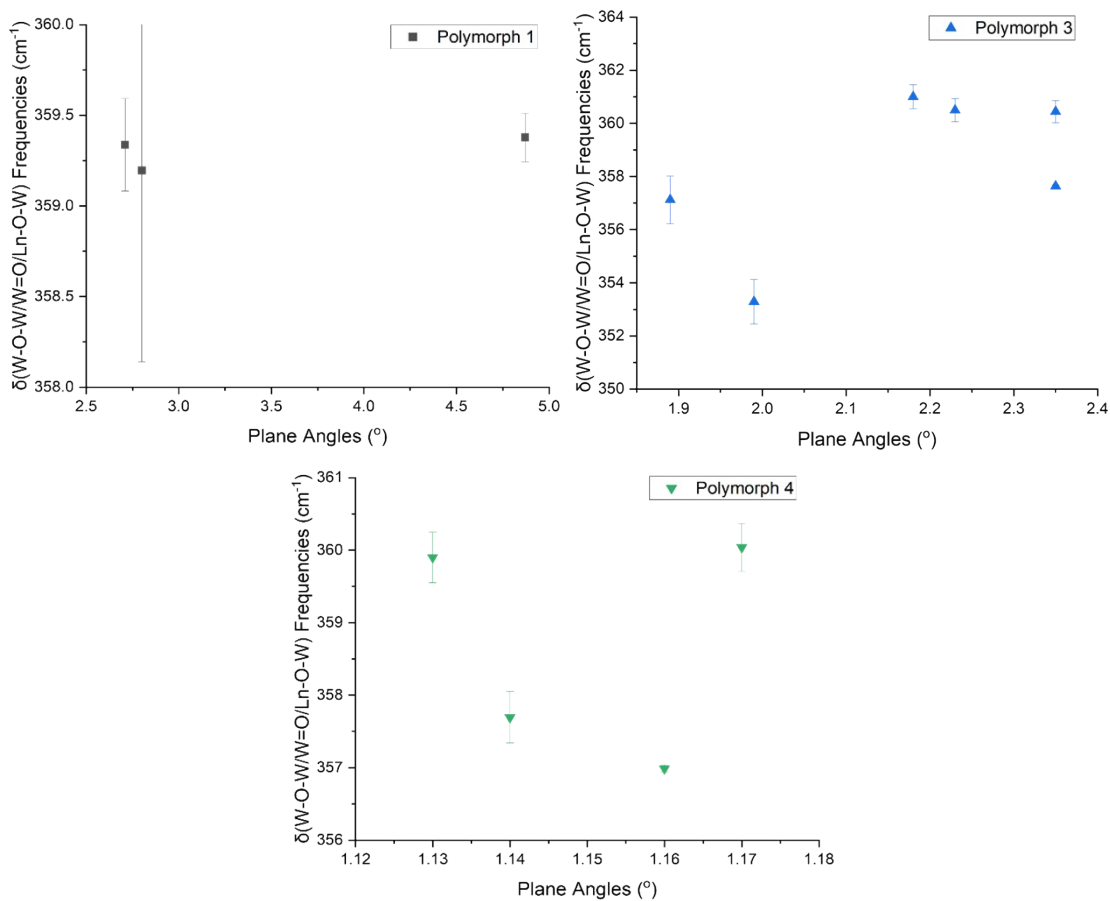

**Figure S51.** Plots of Raman  $\delta(\text{W-O-W/W=O/Ln-O-W})$  frequencies vs. PAs for  $\text{LnW}_{10}$  polymorphs. The  $\delta(\text{W-O-W/W=O/Ln-O-W})$  frequencies were obtained from the fitted Raman spectra of complexes **1-14**. Error bars represent uncertainties of the peak center obtained from the fitting regime.

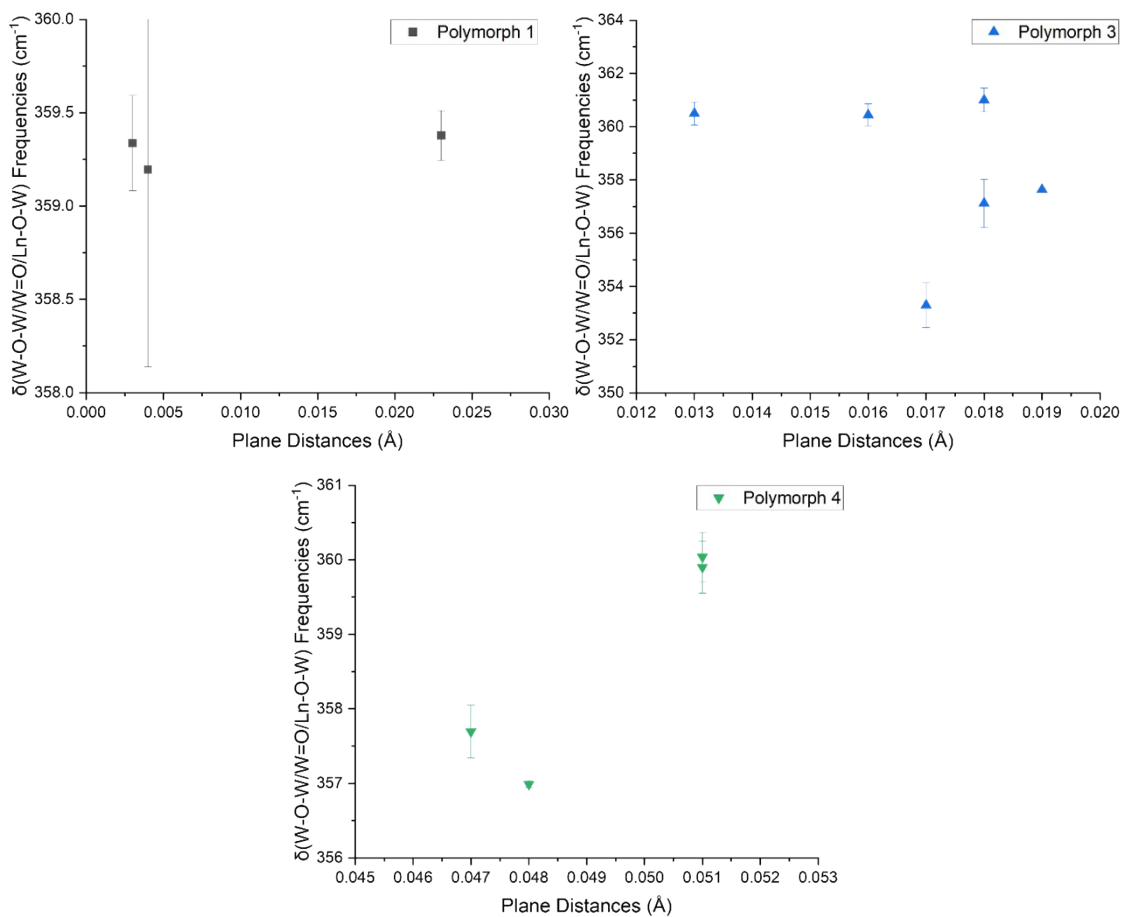

**Figure S52.** Plots of Raman  $\delta(\text{W-O-W/W=O/Ln-O-W})$  frequencies vs. PDs for  $\text{LnW}_{10}$  polymorphs. The  $\delta(\text{W-O-W/W=O/Ln-O-W})$  frequencies were obtained from the fitted Raman spectra of complexes **1-14**. Error bars represent uncertainties of the peak center obtained from the fitting regime.



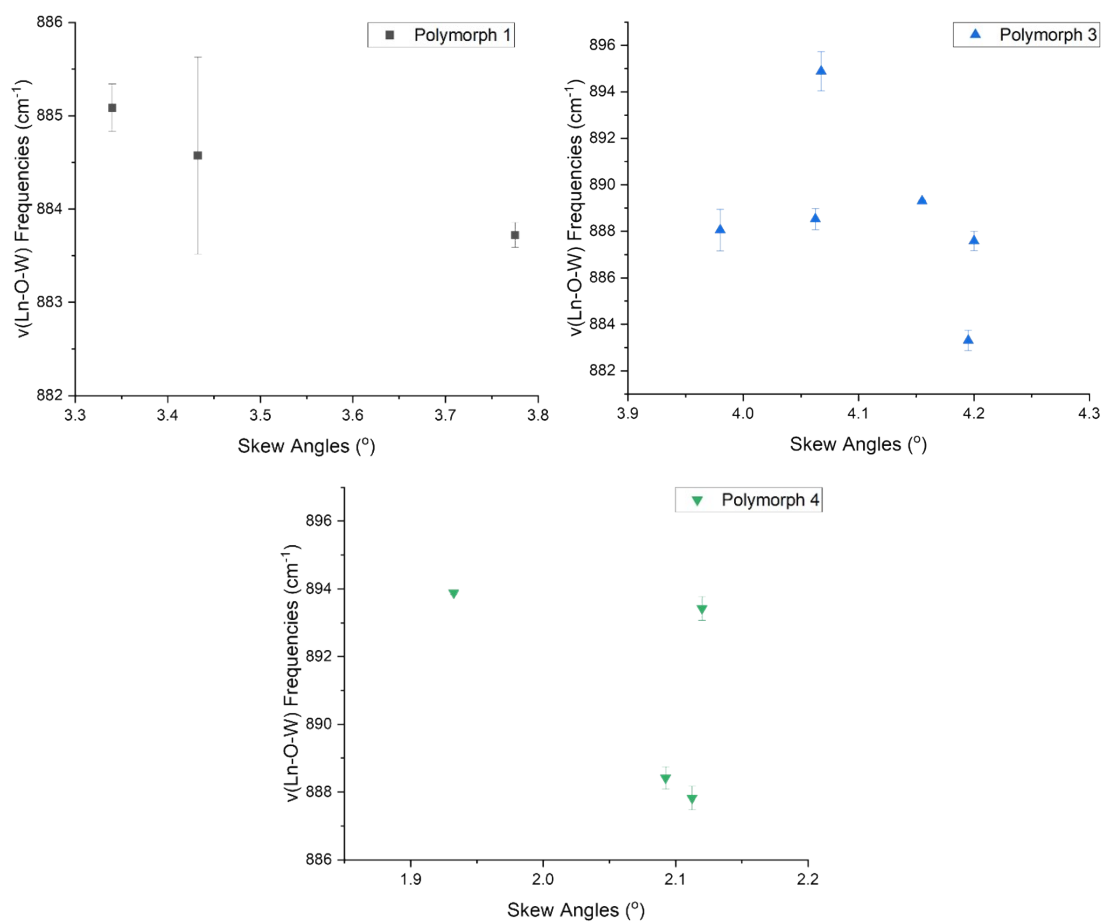

**Figure S53.** Plots of Raman  $\nu(\text{Ln-O-W})$  frequencies vs. SAs for  $\text{LnW}_{10}$  polymorphs. The  $\nu(\text{Ln-O-W})$  frequencies were obtained from the fitted Raman spectra of complexes **1-14**. Error bars represent uncertainties of the peak center obtained from the fitting regime.

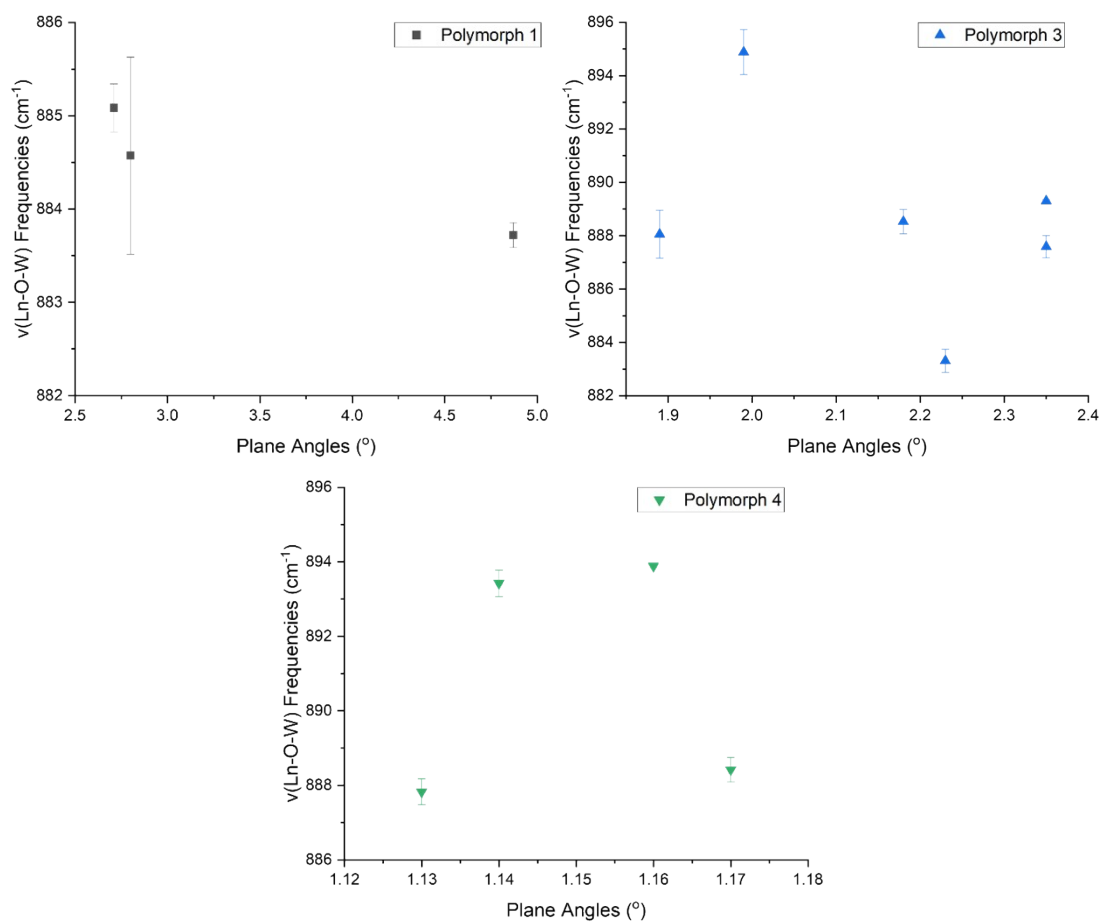

**Figure S54.** Plots of Raman  $\nu(\text{Ln-O-W})$  frequencies vs. PAs for  $\text{LnW}_{10}$  polymorphs. The  $\nu(\text{Ln-O-W})$  frequencies were obtained from the fitted Raman spectra of complexes **1-14**. Error bars represent uncertainties of the peak center obtained from the fitting regime.

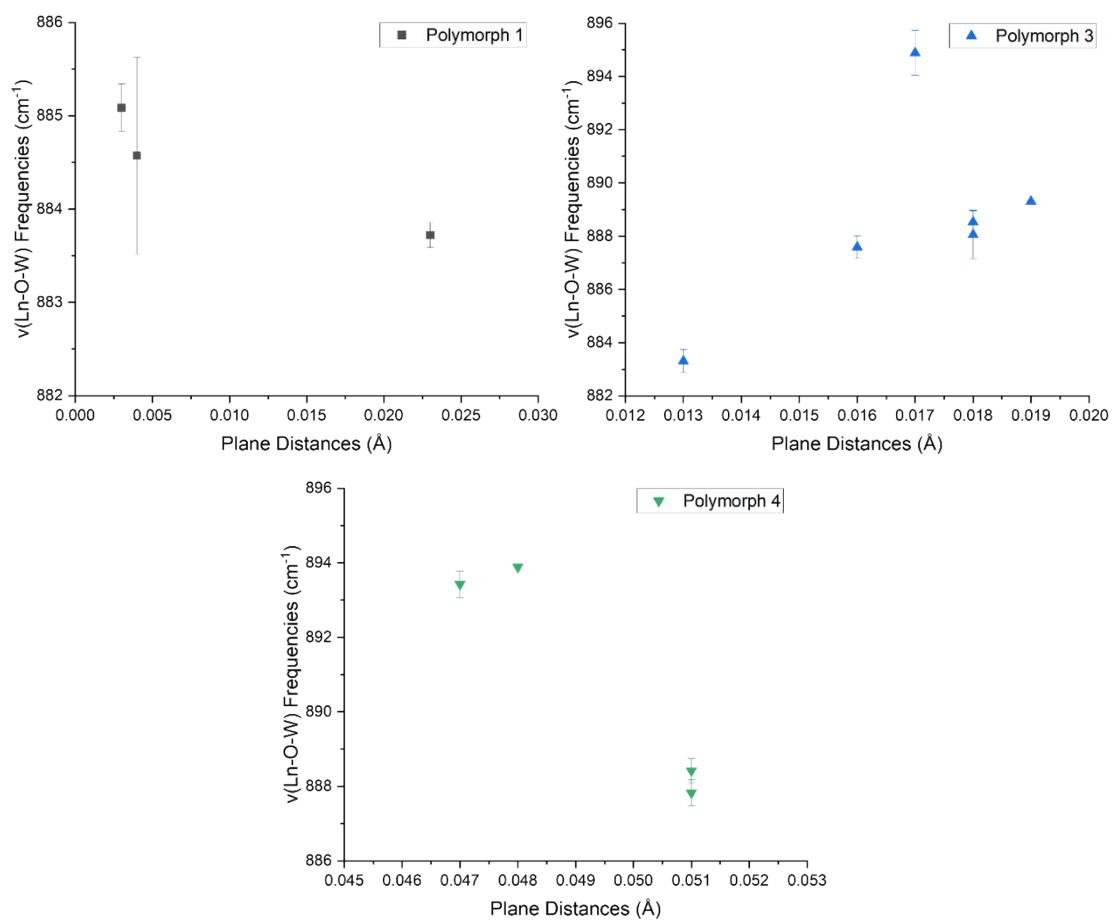

**Figure S55.** Plots of Raman  $\nu(\text{Ln-O-W})$  frequencies vs. PDs for  $\text{LnW}_{10}$  polymorphs. The  $\nu(\text{Ln-O-W})$  frequencies were obtained from the fitted Raman spectra of complexes **1-14**. Error bars represent uncertainties of the peak center obtained from the fitting regime.

**Partial Least Squares (PLS) Analysis.** PLS is a mix of both principal component and multiple regression analysis and is often used to identify factors that contribute to covariances between the independent and dependent variables.<sup>2</sup> Partial Least Square analysis was conducted with the OriginPro2023b software package<sup>3</sup> using the singular value decomposition (SVD) method in which:

$$X = n \cdot m$$

$$Y = n \cdot r$$

Where  $X$  is the matrix size for the independent variables and  $Y$  is the matrix size for the dependent variables and  $n$ ,  $m$ , and  $r$  are the number of observations, number of independent variables, and number of dependent variables, respectively. The mean from each column in matrix  $X$  and  $Y$  are subtracted to produce  $X_0$  and  $Y_0$ . In SVD, the weight ( $w$ ) of the independent variables is extracted by normalizing the first left singular vector of  $X_0^T Y_0$  which then is used to calculate:

$$t = X_0 w$$

$$p = X_0^T t$$

$$q = Y_0^T t$$

$$u = Y_0 q$$

where  $t$ ,  $p$ ,  $q$ , and  $u$  are the x scores, y scores, x loadings, and y loadings which can also be expressed by matrices,  $T$ ,  $P$ ,  $Q$ , and  $U$ . These parameters are then refined against the residual matrices,  $k$ , until they converge, and  $k$  factors can be synthesized to construct the model.

The leave-one-out cross-validation (CV) method tests the performance of a model and is often used to prevent overfitting of a model by producing multiple models with one of the independent variables left out and looking into which combination of independent variables give the best model to predict the dependent variables.<sup>2</sup> In Origin2023b, this is done by finding the minimum root mean PRESS (predicted residual sum of squares) which can be found by using the following equation:

$$PRESS = \sum_{i=1}^n \sum_{j=1}^r (Y_{ij} - \hat{Y}_{ij})^2$$

$$Root\ Mean\ PRESS = \sqrt{\frac{PRESS}{(n-1)r}}$$

$\hat{Y}_{ij}$  represents the predicted value of  $Y$  based on the leave-one-out cross-validation test. Prediction of dependent variables can then be done by calculating the coefficients of the fitted model which can be obtained from the following equation:

$$C = W(P^T W)^{-1} Q^T$$

where  $C$  and  $W$  are coefficient and weight matrices, respectively. The predicted dependent variables value can then be calculated by:

$$\hat{Y}_0 = C X_0$$

From PLS analysis, a variety of figures are generated; however, only the root mean PRESS plot, Y-variance accountability plot, variable influence on projection (VIP) plot, and diagnostic plots are presented here. The root mean PRESS plot shows the results of the CV test with the optimal number of factors having the lowest root mean PRESS value. The Y-variance accountability plots show how each factor accounts for the

variance in the dependent ( $Y$ ) variable. In Origin2023b the variance explained for  $Y$  variables is calculated using the following equation:

$$\frac{\sum_{j=1}^k Q_{lj}^2}{\sum_{i=1}^n Y_{0il}^2}$$

The VIP plots show the significance of each independent variable related to the dependent variable with a VIP value above 0.8 indicating statistical significance. Four diagnostic plots are generated by the PLS analysis which include: the actual versus predicted dependent variable value plots that show the quality of the model generated based on the independent variables inputted, the residual versus observed and predicted dependent variable plots that provide information regarding the distribution of the dependent variable dataset where a normal distribution exhibits random scattering of the data around the fitted line with a constant bandwidth, and the normal percentile plot which also provides information about data distribution with a normal distribution of data represented by the residual against percentiles forming a linear line.

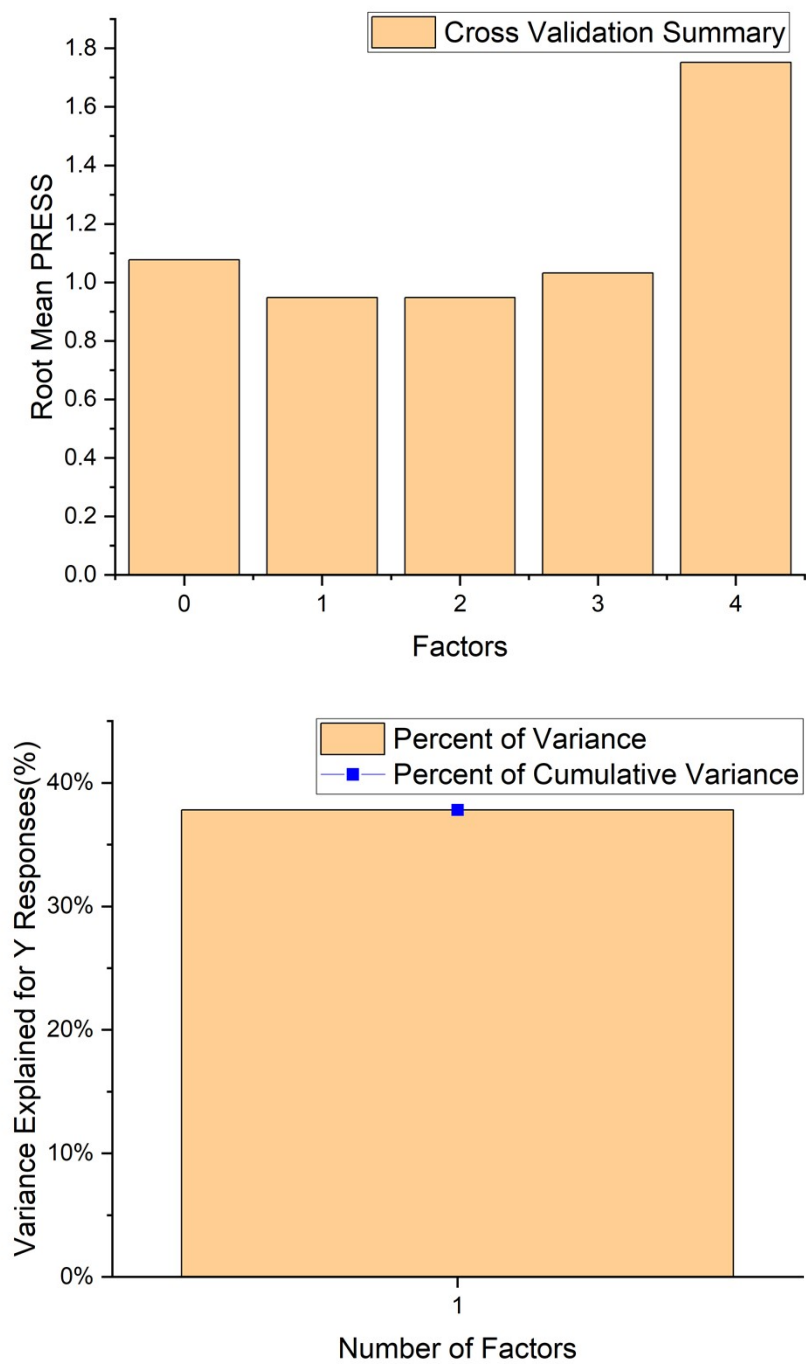

**Figure S56. (Top)** Root mean PRESS and **(Bottom)** Y-variance accountability plots for SAs, PAs, PDs, and ionic radii as independent variables with the  $\nu(\text{WO}_5)_2$  frequencies as the dependent variable. The  $\nu(\text{WO}_5)_2$  frequencies were obtained from the fitted FIR spectra of complexes **1-14**.

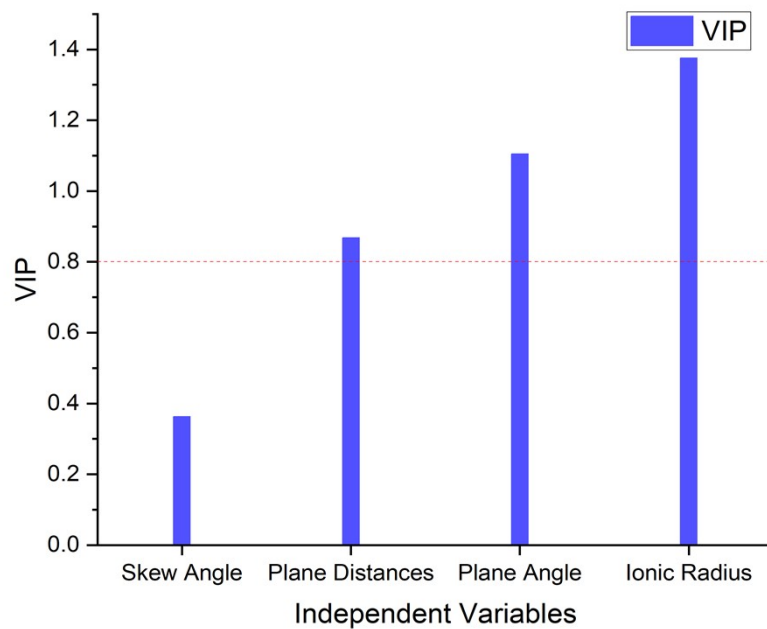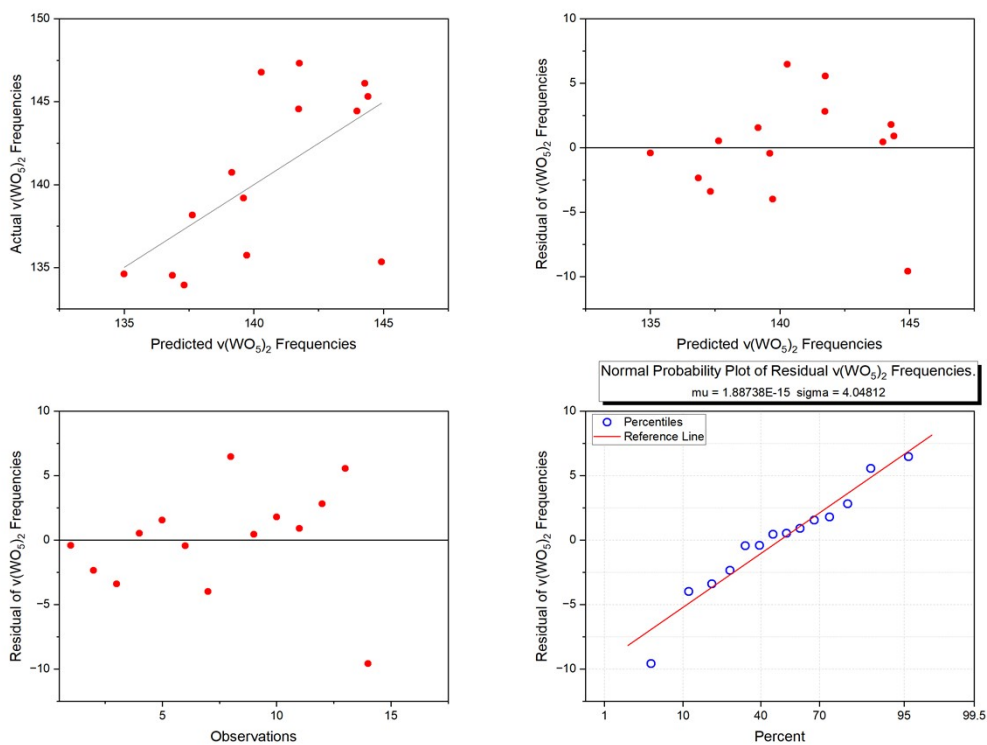

**Figure S57.** (Top) VIP plot and (Bottom) diagnostic plots for SAs, PAs, PDs, and ionic radii as independent variables with  $\nu(\text{WO}_5)_2$  frequencies as the dependent variable. The  $\nu(\text{WO}_5)_2$  frequencies were obtained from the fitted FIR spectra of complexes **1-14**.

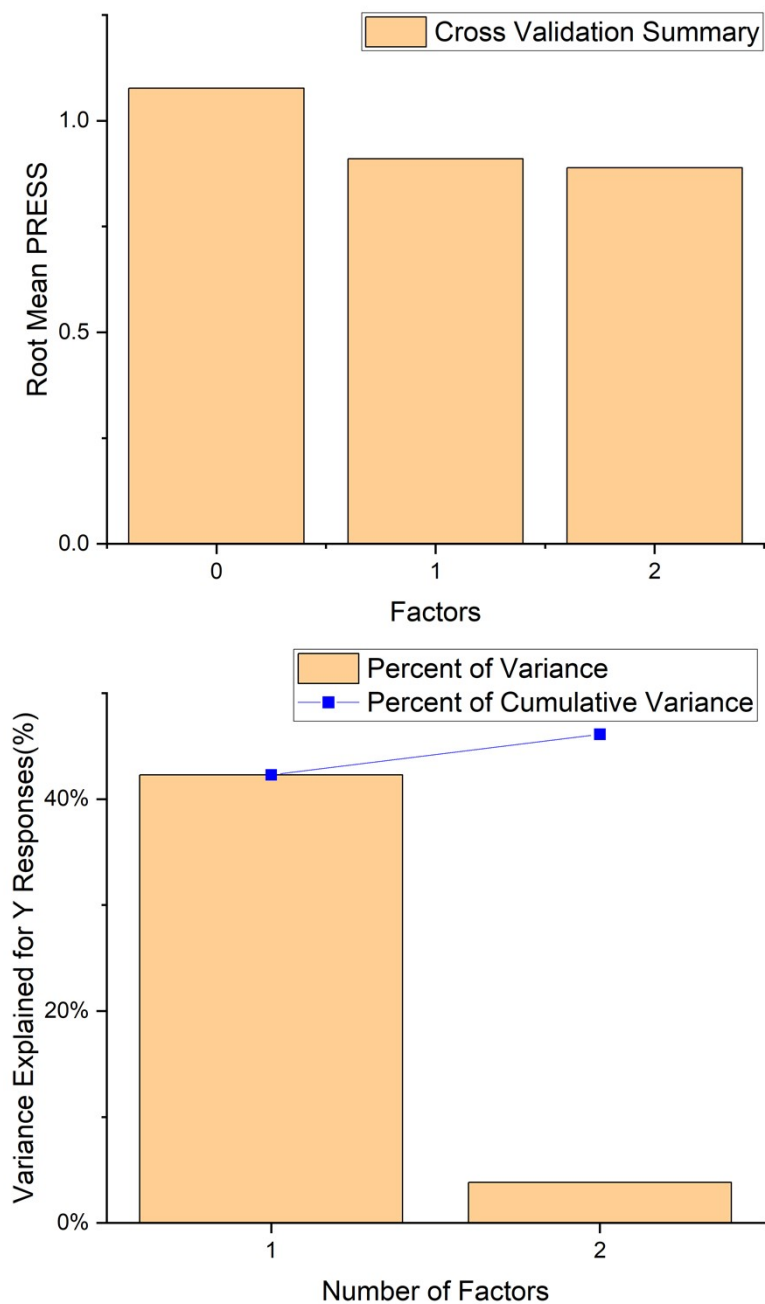

**Figure S58. (Top)** Root mean PRESS and **(Bottom)** Y-variance accountability plots for PAs and ionic radii as the independent variables and  $\nu(\text{WO}_5)_2$  frequencies as the dependent variable. The  $\nu(\text{WO}_5)_2$  frequencies were obtained from the fitted FIR spectra of complexes 1-14.



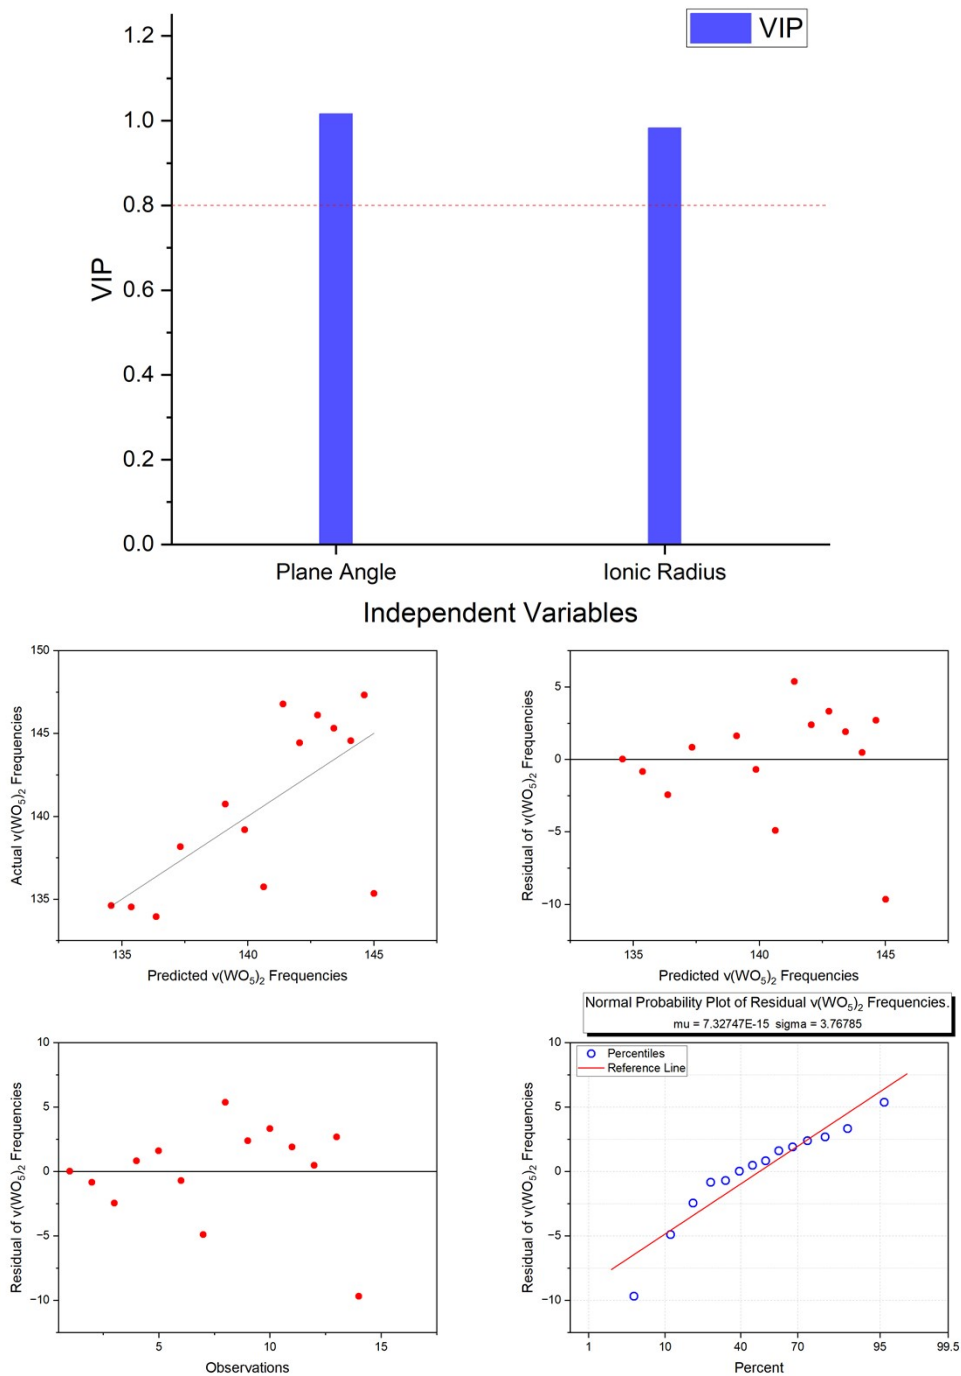

**Figure S59.** (Top) VIP plot and (Bottom) diagnostic plots for PAs and ionic radii as independent variables with  $\nu(\text{WO}_5)_2$  frequencies as the dependent variable. The  $\nu(\text{WO}_5)_2$  frequencies were obtained from the fitted FIR spectra of complexes **1-14**.

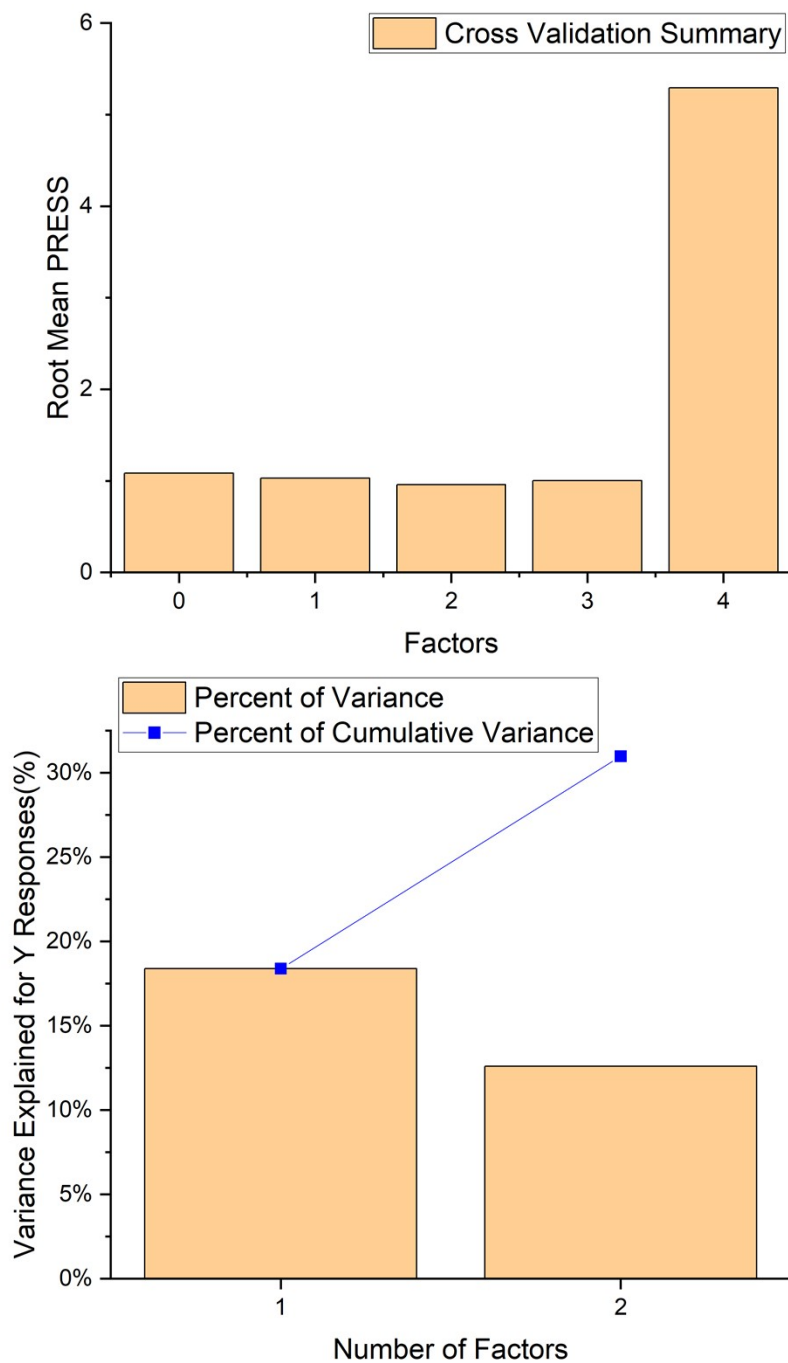

**Figure S60.** (Top) Root mean PRESS and (Bottom) Y-variance accountability plots for SAs, PAs, PDs, and ionic radii as independent variables with  $\rho(\text{LnO}_8)$  frequencies as the dependent variable. The  $\rho(\text{LnO}_8)$  frequencies were obtained from the fitted FIR spectra of complexes **1-14**.

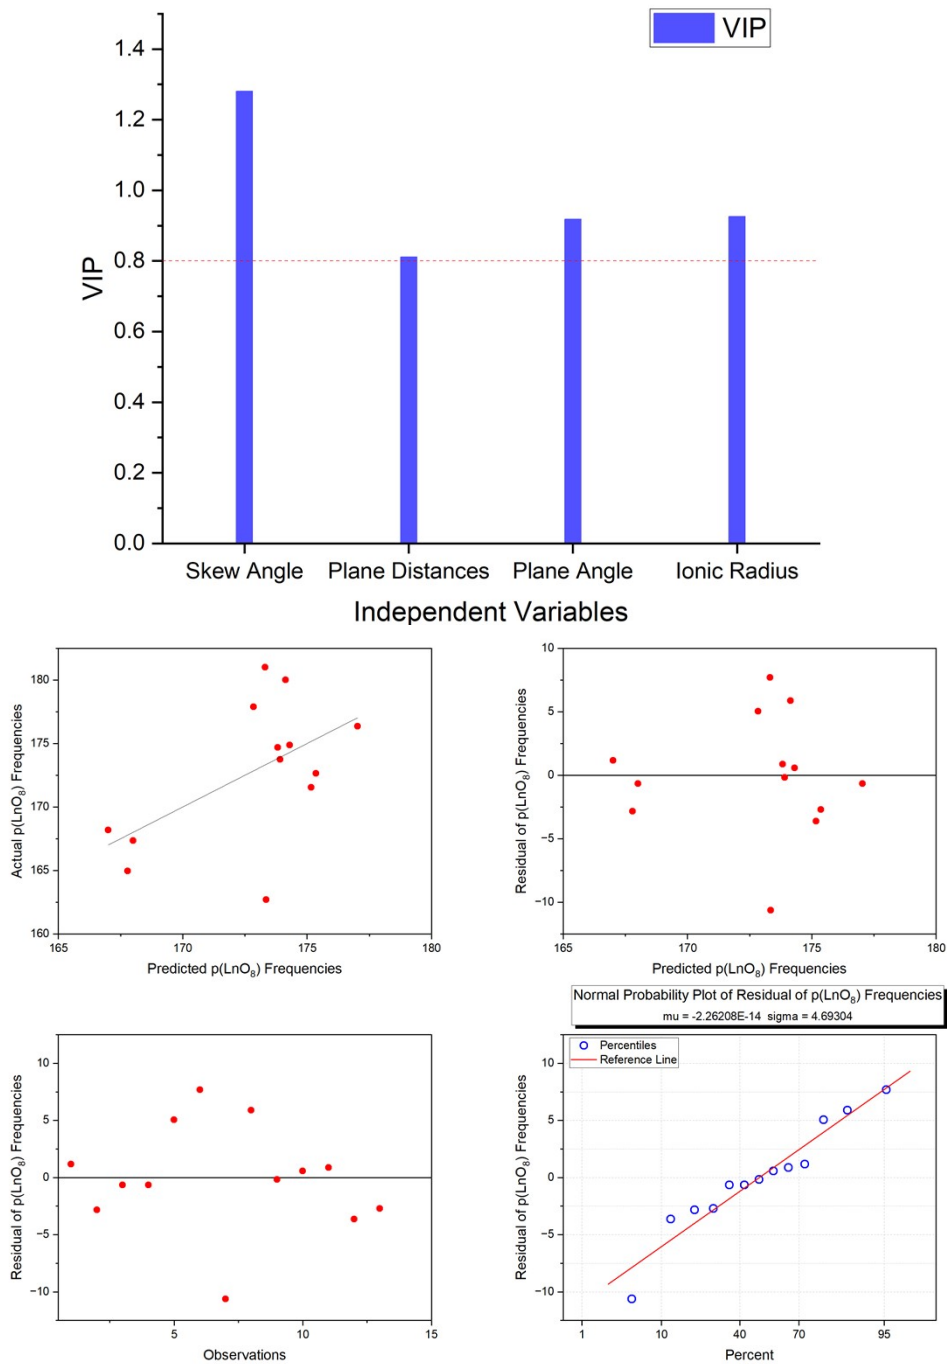

**Figure S61.** (Top) VIP plot and (Bottom) diagnostic plots for SAs, PAs, PDs, and ionic radii as independent variables and  $p(\text{LnO}_8)$  frequencies as the dependent variable. The  $p(\text{LnO}_8)$  frequencies were obtained from the fitted FIR spectra of complexes **1-14**.

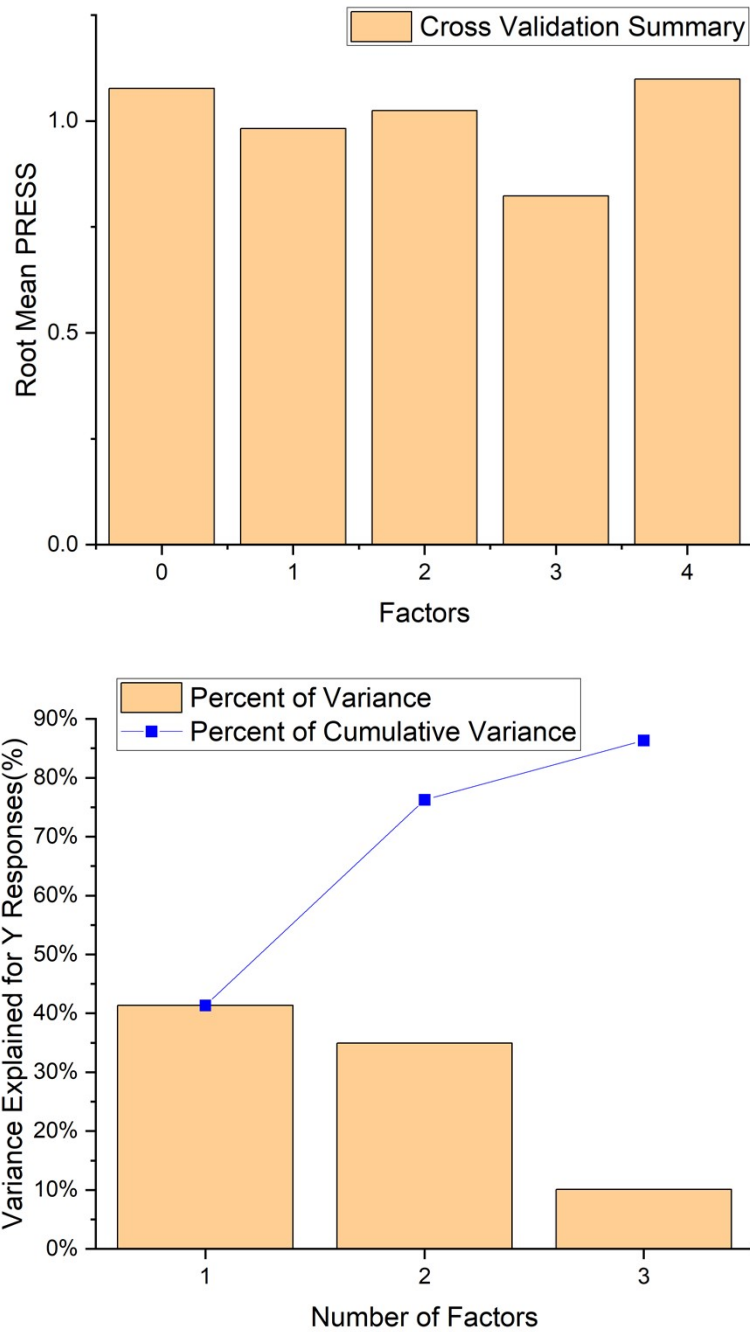

**Figure S62.** (Top) Root mean PRESS and (Bottom) Y-variance accountability plots for SAs, PAs, PDs, and ionic radii as independent variables with  $\nu/\rho(\text{LnO}_8)$  frequencies as the dependent variable. The  $\nu/\rho(\text{LnO}_8)$  frequencies were obtained from the fitted FIR spectra of complexes 1-14.

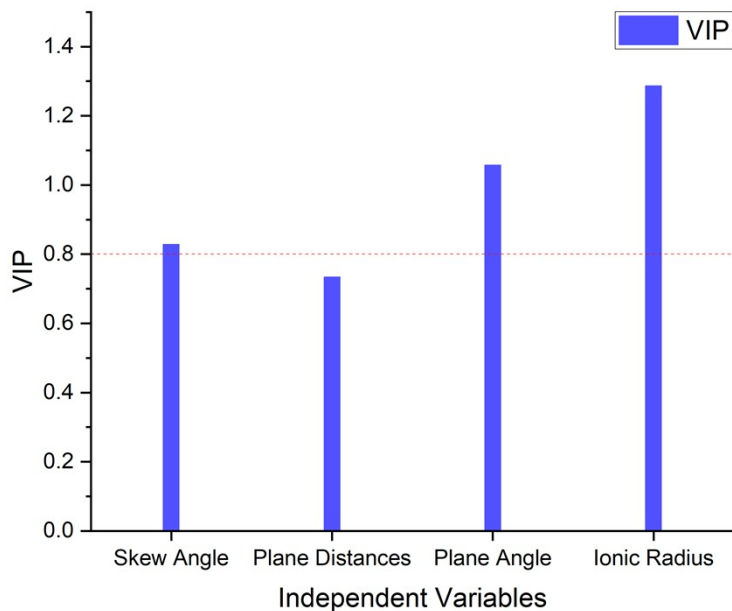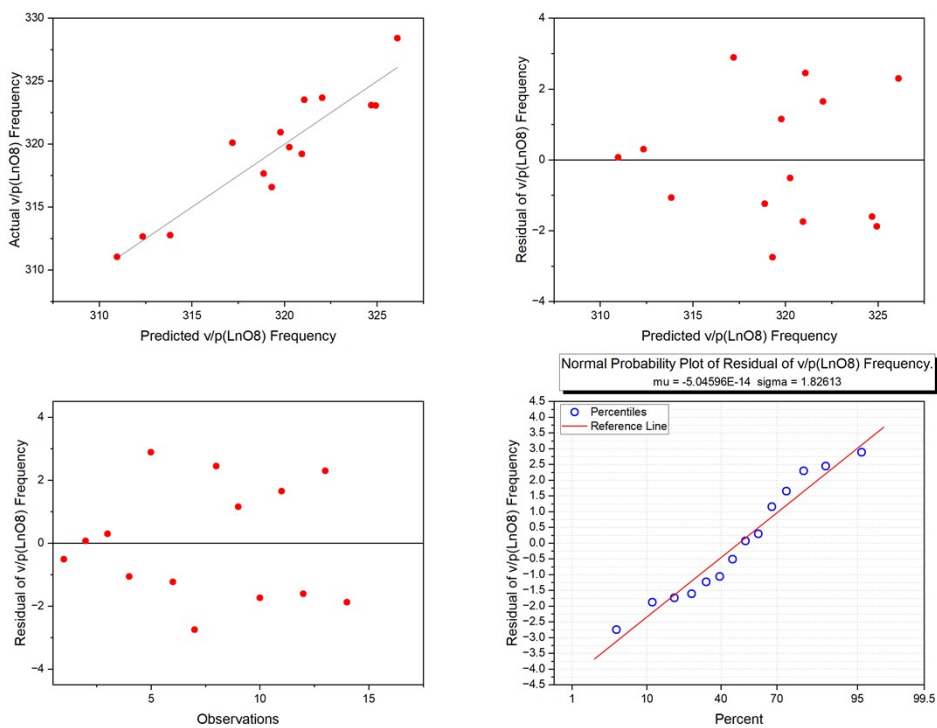

**Figure S63.** (Top) VIP plot and (Bottom) diagnostic plots for SAs, PAs, PDs, and ionic radii as independent variables and  $\nu/\rho(\text{LnO}_8)$  frequencies as the dependent variable. The  $\nu/\rho(\text{LnO}_8)$  frequencies were obtained from the fitted FIR spectra of complexes **1-14**.

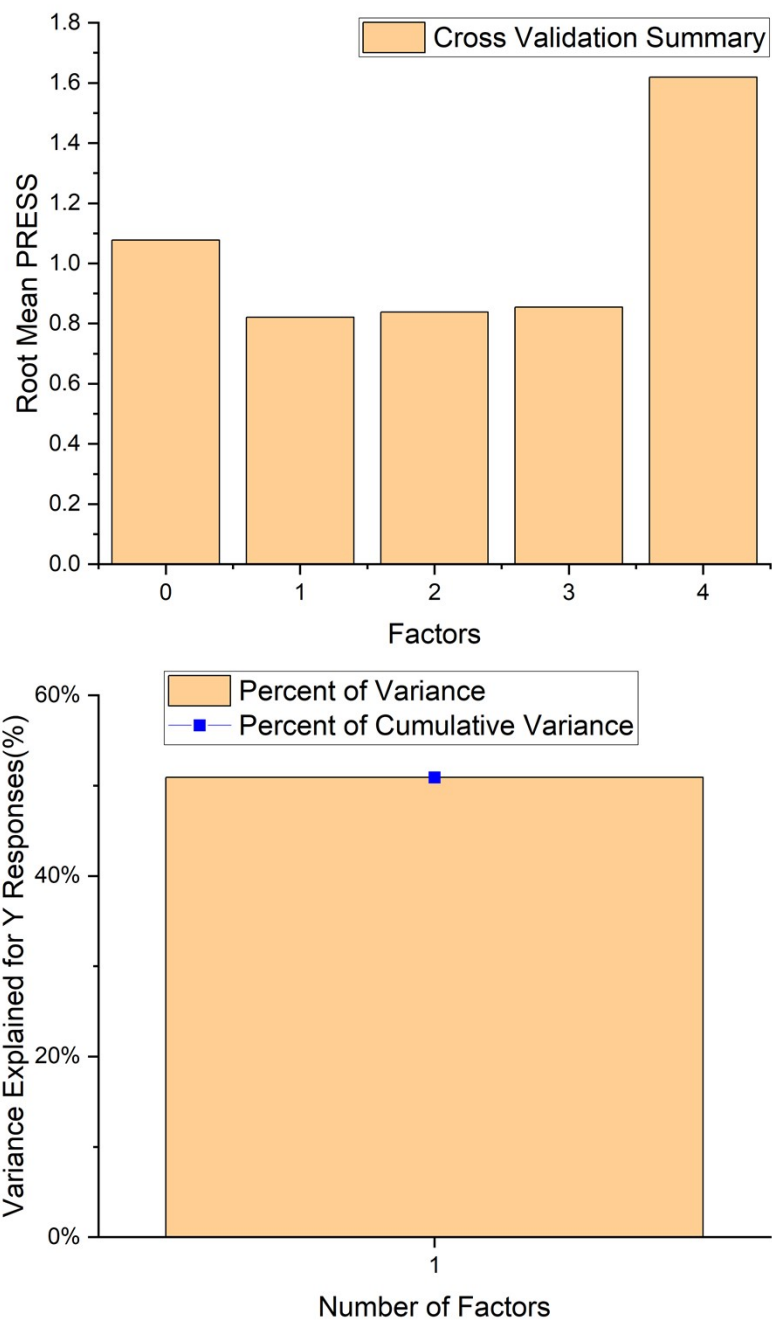

**Figure S64. (Top)** Root mean PRESS and **(Bottom)** Y-variance accountability plots for SAs, PAs, PDs, and ionic radii as independent variables with  $\nu(\text{Ln-O-W})$  frequencies as the dependent variable. The  $\nu(\text{Ln-O-W})$  frequencies were obtained from the fitted Raman spectra of complexes **1-14**.

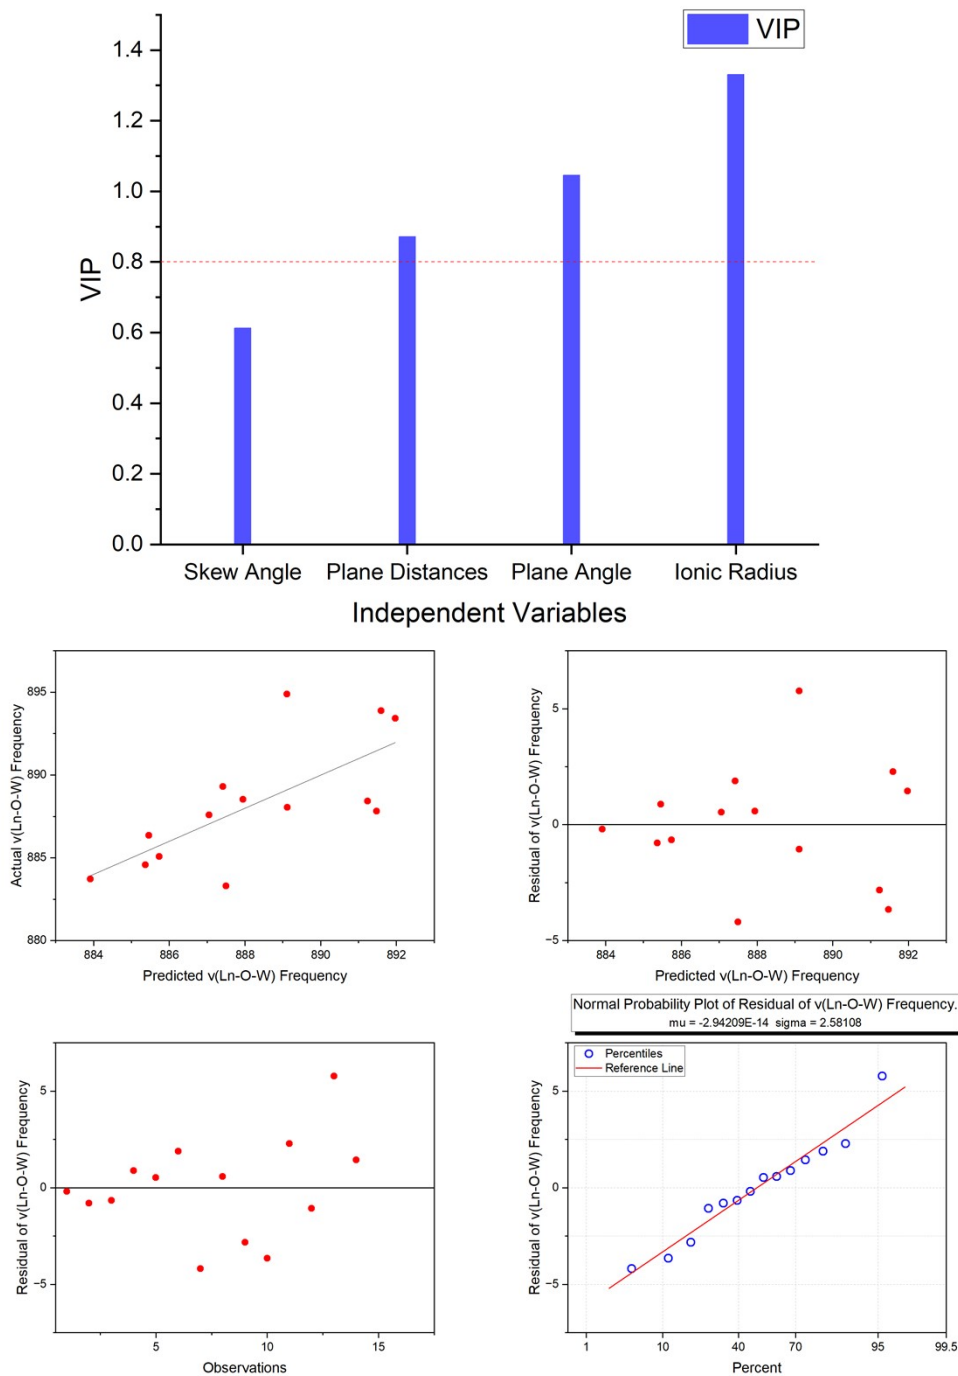

**Figure S65.** (Top) VIP plot and (Bottom) diagnostic plots for SAs, PAs, PDs, and ionic radii as independent variables and  $\nu(\text{Ln-O-W})$  frequencies as the dependent variable. The  $\nu(\text{Ln-O-W})$  frequencies were obtained from the fitted Raman spectra of complexes **1-14**.

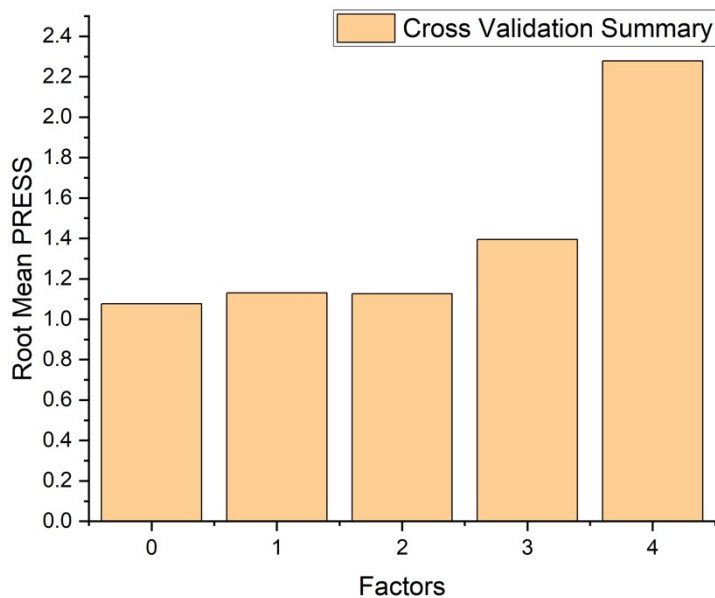

**Figure S66. (Top)** Root mean PRESS for SAs, PAs, PDs, and ionic radii as independent variables and the  $\delta(\text{W-O-W/ W=O/ Ln-O-W})$  Raman frequencies as the dependent variable. Full PLS analysis was not conducted due to the CV finding zero factors from the independent variables that had statistically significant effects on  $\delta(\text{W-O-W/ W=O/ Ln-O-W})$  Raman frequencies.



## References

1. L. Kazanskii, A. Golubev, I. Baburina, E. Torchenkova and V. Spitsyn, *Bull. Acad. Sci. USSR, Div. Chem. Sci.*, 1978, **27**, 1956-1960.
2. P. Geladi and B. R. Kowalski, *Anal. Chim. Acta*, 1986, **185**, 1-17.
3. OriginPro, Version 2023b, Origin Lab Corporation, Northampton, MA, USA.
4. A. E. Gelfand, D. K. Dey and H. Chang, *Model Determination Using Predictive Distributions with Implementation via Sampling-Based Methods*, Technical Report No. 462, U.S. Office of Naval Research, 1992.
